# Supplementary material for: Quantitative Proteomic Analysis of ER Stress Response Reveals both Common and Specific Features in Two Contrasting Ecotypes of Arabidopsis thaliana
Source: MDPI journal article supplement (doi:10.3390/ijms21249741), 2020-12-21
Supplement: s1 [file s1]

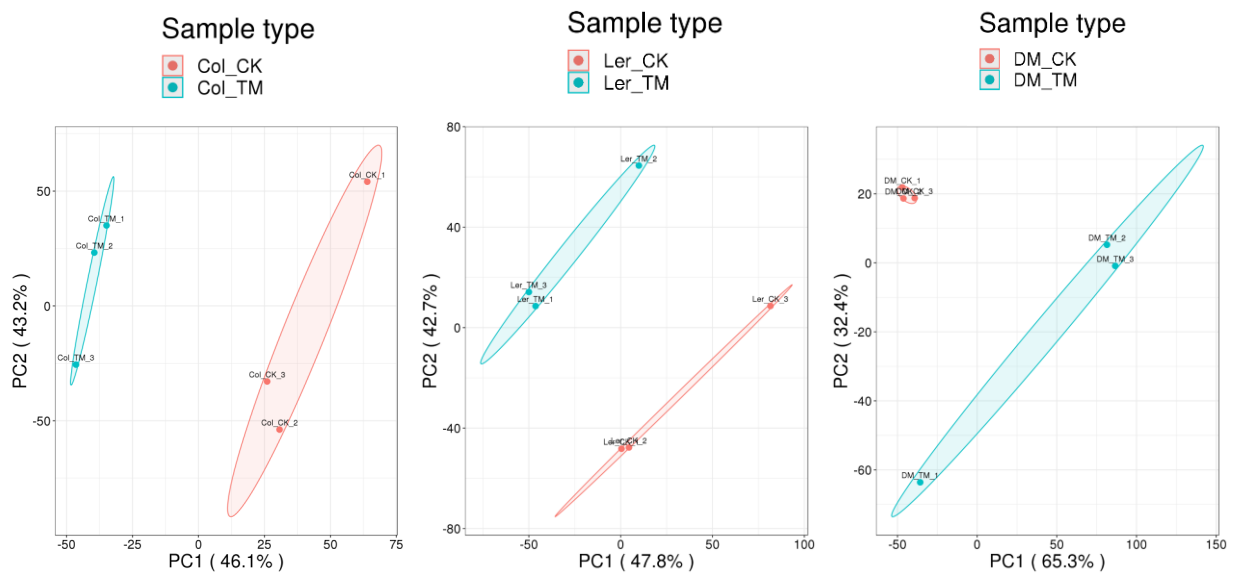

**Supplementary Figure 1 |** Principal components analysis (PCA) of samples from three replicates across three group of plants.

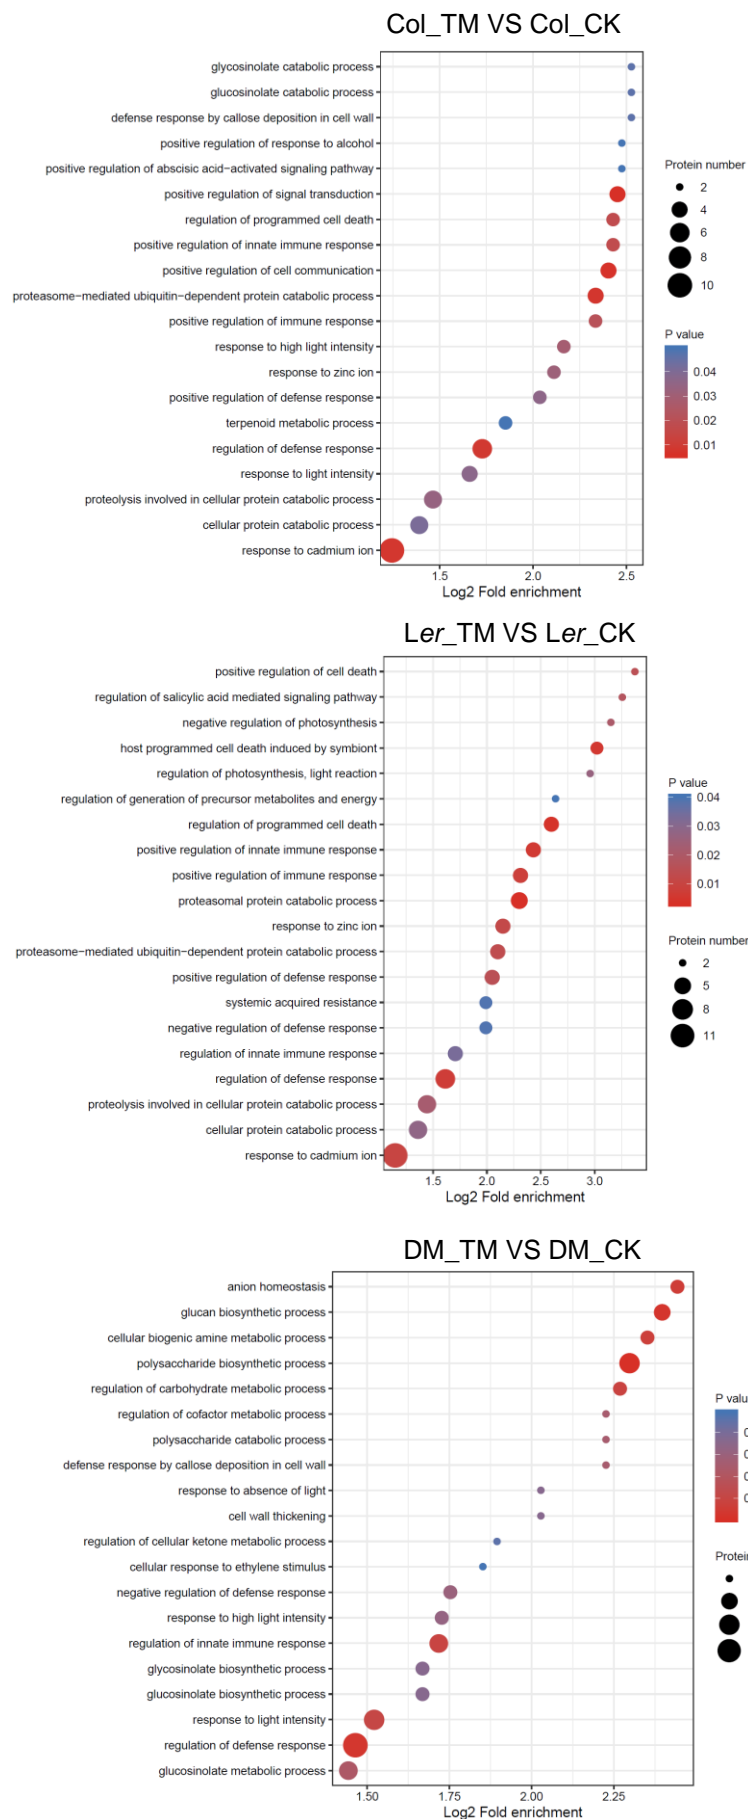

**Supplementary Figure 2 |** Functional enrichment (biological process) analysis of differentially expressed proteins between TM-treated and control (CK) plants.

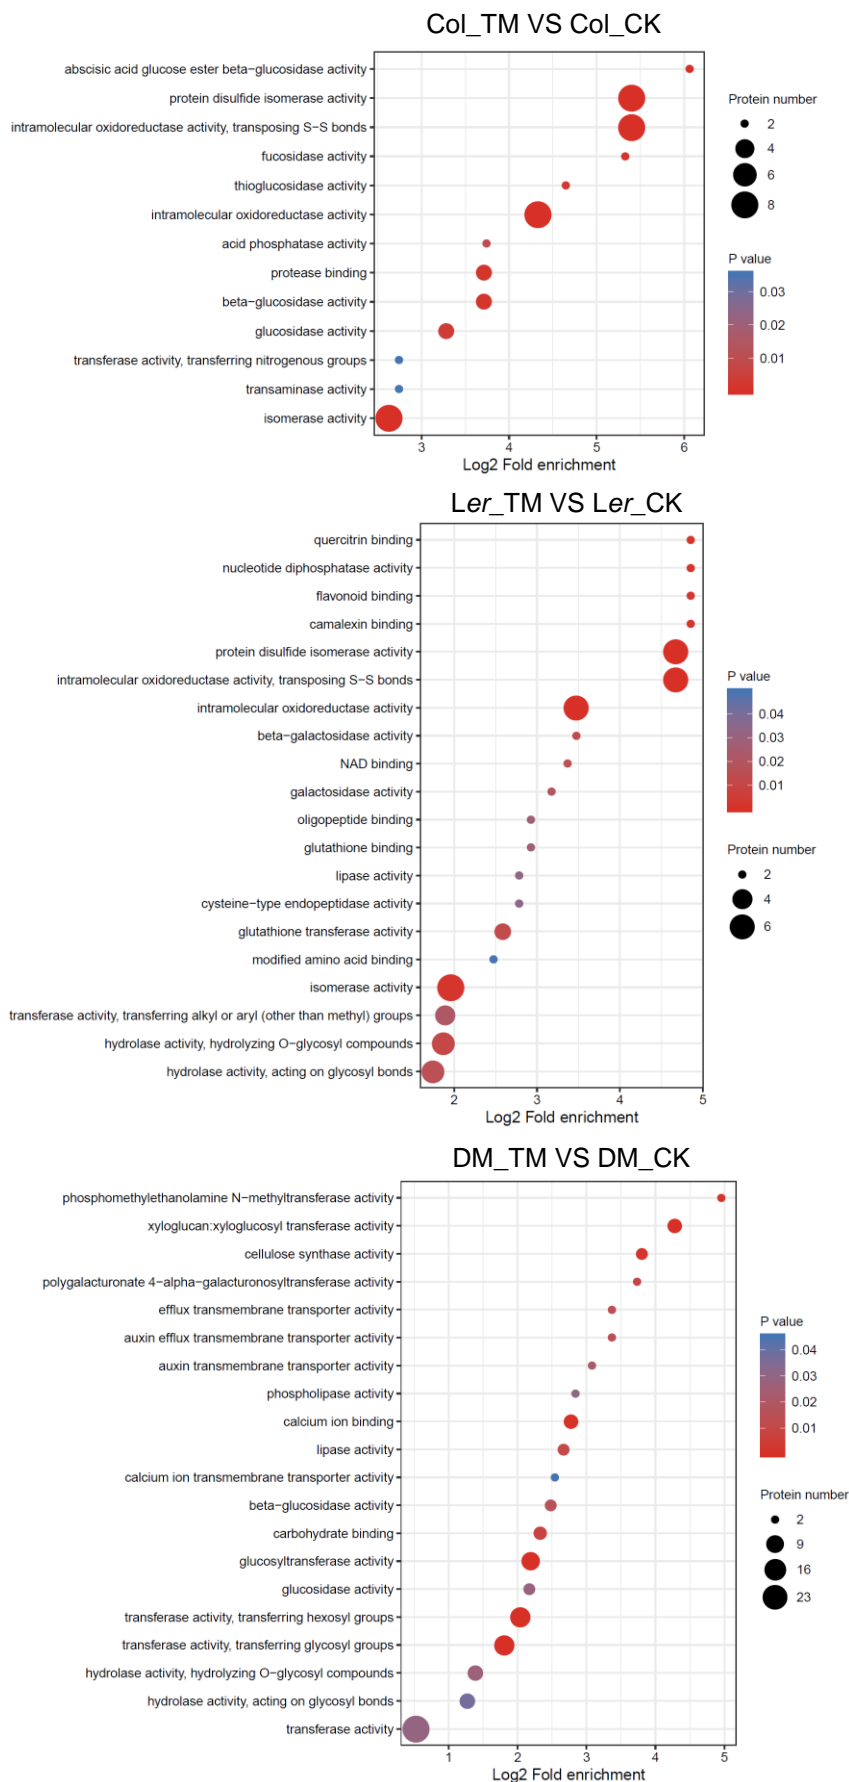

**Supplementary Figure 3** | Functional enrichment (molecular function) analysis of differentially expressed proteins between TM-treated and control (CK) plants.

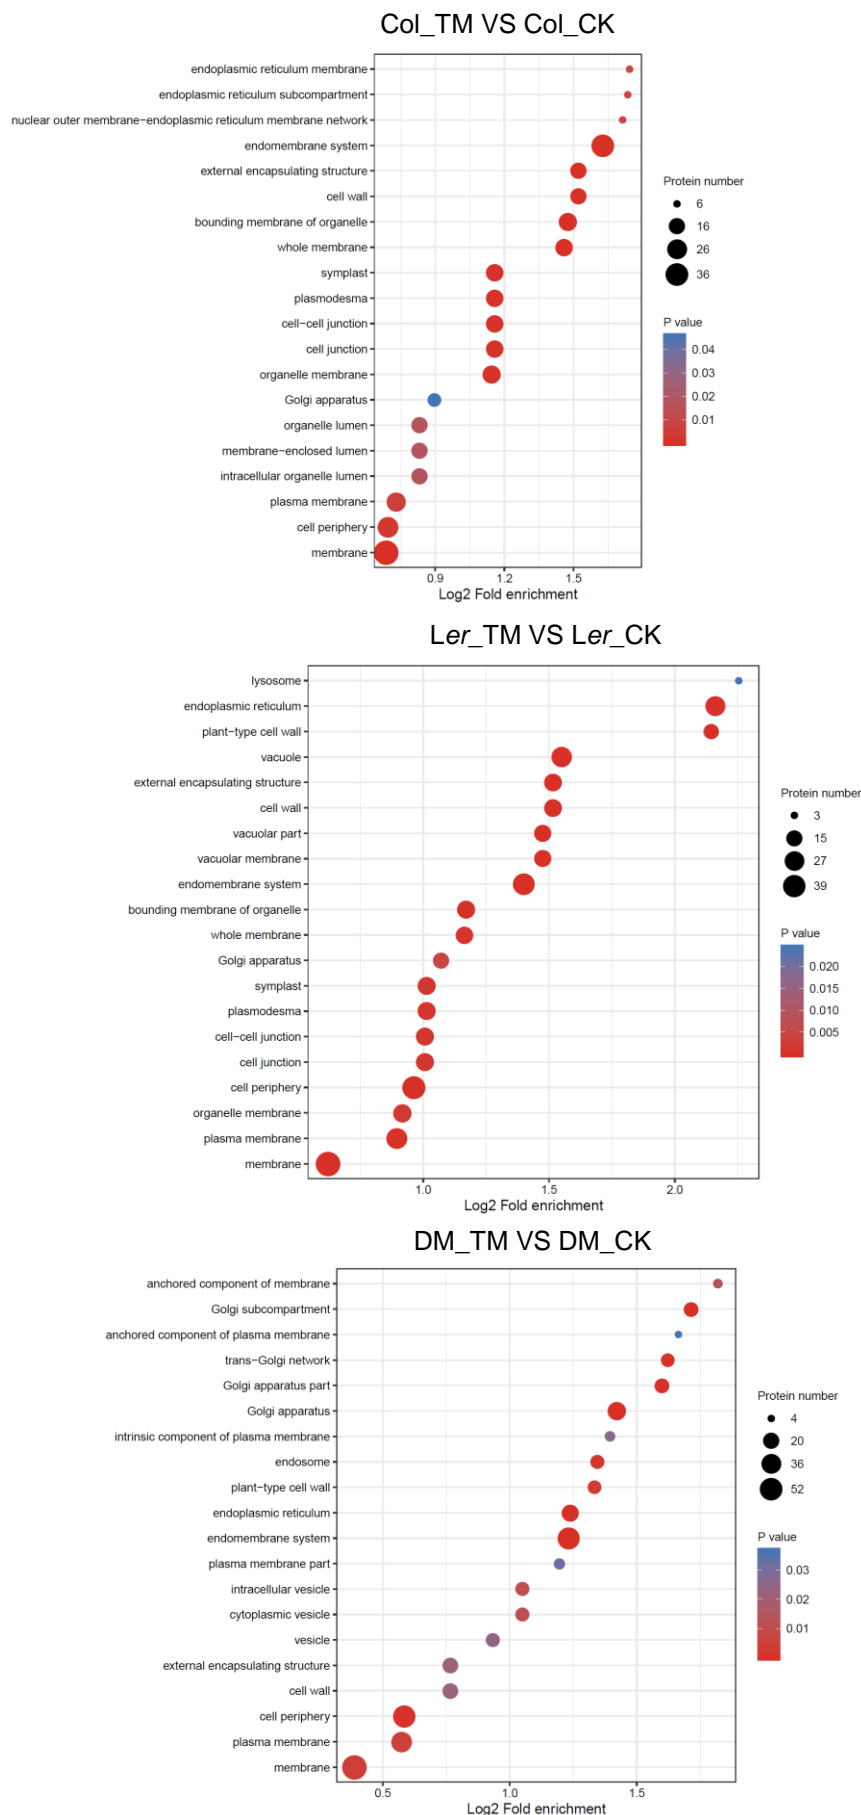

**Supplementary Figure 4 |** Functional enrichment (cellular component) analysis of differentially expressed proteins between TM-treated and control (CK) plants.
