# Supplementary material for: Quantitative Proteomic Analysis of ER Stress Response Reveals both Common and Specific Features in Two Contrasting Ecotypes of Arabidopsis thaliana
Source: Int J Mol Sci. 2020 Dec 21;21(24):9741. doi: 10.3390/ijms21249741 (PMC7766468; doi:10.3390/ijms21249741)
Supplement: Supplementary file 1 [file ijms-21-09741-s001.zip]

Archive with 4 entries (4 files):
- IJMS SUPPL FIGURES.pdf
- Table S1.xlsx
- Table S2.xlsx
- Table S3.xlsx
