# Supplementary material for: Quantitative Proteomic Analysis of ER Stress Response Reveals both Common and Specific Features in Two Contrasting Ecotypes of Arabidopsis thaliana
Source: Int J Mol Sci. 2020 Dec 21;21(24):9741. doi: 10.3390/ijms21249741 (PMC7766468; doi:10.3390/ijms21249741)
Supplement: Supplementary file 1 [file ijms-21-09741-s001.zip › Table S1.xlsx]

## Sheet: Col_TM VS Col_CK 
Table S1. Protein identification and abundance of differentially regulated proteins in Col, Ler and DM plants.
Protein accession	Locus	Protein description	Gene name	Col_TM/Col_CK Ratio	Col_TM/Col_CK P value	Regulated Type	MW [kDa]	Coverage [%]	Peptides	PSM	Unique Peptides	Col_CK_1	Col_CK_2	Col_CK_3	Col_TM_1	Col_TM_2	Col_TM_3	Subcellular localization	KEGG KO No.	KEGG Gene	KEGG pathway	Biological Process	Cellular Component	Molecular Function	Pfam ID	Domain description	KOG category	KOG NO.	KOG description
A0A1P8AYF2	AT2G24980	Proline-rich extensin-like family protein OS=Arabidopsis thaliana OX=3702 GN=EXT6 PE=4 SV=1	EXT6	1.441	0.0170941	Up	63.8	56	1	2	1	0.803	0.867	0.788	1.174	1.36	1.008	extracellular
A0A1P8B8R9	AT4G16660	Heat shock protein 70 (Hsp 70) family protein OS=Arabidopsis thaliana OX=3702 GN=At4g16660 PE=4 SV=1	At4g16660	3.145	7.24069e-07	Up	99.6	19	14	28	14	0.464	0.48	0.48	1.512	1.527	1.44	chloroplast	K09486	HYOU1; hypoxia up-regulated 1	map04141 Protein processing in endoplasmic reticulum		GO:0005622 intracellular; GO:0005623 cell; GO:0005737 cytoplasm; GO:0005773 vacuole; GO:0005774 vacuolar membrane; GO:0005783 endoplasmic reticulum; GO:0005794 Golgi apparatus; GO:0009507 chloroplast; GO:0009536 plastid; GO:0012505 endomembrane system; GO:0016020 membrane; GO:0031090 organelle membrane; GO:0043226 organelle; GO:0043227 membrane-bounded organelle; GO:0043229 intracellular organell…				O	KOG0104	Molecular chaperones GRP170/SIL1, HSP70 superfamily
A0A1P8BF32	AT5G42020	Heat shock protein 70 (Hsp 70) family protein OS=Arabidopsis thaliana OX=3702 GN=BIP2 PE=1 SV=1	BIP2	1.745	2.41523e-05	Up	74.3	47	28	102	3	0.747	0.722	0.701	1.257	1.302	1.228	cytoplasm	K09490	HSPA5, BIP; heat shock 70kDa protein 5	map03060 Protein export; map04141 Protein processing in endoplasmic reticulum	GO:0006508 proteolysis; GO:0006511 ubiquitin-dependent protein catabolic process; GO:0006807 nitrogen compound metabolic process; GO:0006950 response to stress; GO:0008152 metabolic process; GO:0009056 catabolic process; GO:0009057 macromolecule catabolic process; GO:0009719 response to endogenous stimulus; GO:0009725 response to hormone; GO:0009735 response to cytokinin; GO:0009987 cellular proc…	GO:0005618 cell wall; GO:0005622 intracellular; GO:0005623 cell; GO:0005634 nucleus; GO:0005654 nucleoplasm; GO:0005730 nucleolus; GO:0005737 cytoplasm; GO:0005773 vacuole; GO:0005774 vacuolar membrane; GO:0005783 endoplasmic reticulum; GO:0005788 endoplasmic reticulum lumen; GO:0005794 Golgi apparatus; GO:0005829 cytosol; GO:0005886 plasma membrane; GO:0005911 cell-cell junction; GO:0009506 plas…				O	KOG0100	Molecular chaperones GRP78/BiP/KAR2, HSP70 superfamily
F4ICD9	AT1G18830	Protein transport protein SEC31 homolog A OS=Arabidopsis thaliana OX=3702 GN=SEC31A PE=1 SV=1	SEC31A	1.661	0.000716242	Up	106.5	7	7	10	6	0.767	0.692	0.783	1.17	1.332	1.221	chloroplast	K14005	SEC31; protein transport protein SEC31	map04141 Protein processing in endoplasmic reticulum		GO:0005622 intracellular; GO:0005623 cell; GO:0005737 cytoplasm; GO:0005829 cytosol; GO:0005911 cell-cell junction; GO:0009506 plasmodesma; GO:0016020 membrane; GO:0030054 cell junction; GO:0044424 intracellular part; GO:0044444 cytoplasmic part; GO:0044464 cell part; GO:0055044 symplast;		PF12931	Sec23-binding domain of Sec16	U	KOG0307	Vesicle coat complex COPII, subunit SEC31
F4IJ44	AT2G41100	Calcium-binding EF hand family protein OS=Arabidopsis thaliana OX=3702 GN=TCH3 PE=4 SV=1	TCH3	1.683	0.000947232	Up	32.8	26	6	12	6	0.739	0.699	0.826	1.29	1.332	1.188	cytoplasm	K13448	CML; calcium-binding protein CML	map04626 Plant-pathogen interaction	GO:0006109 regulation of carbohydrate metabolic process; GO:0006950 response to stress; GO:0006979 response to oxidative stress; GO:0007154 cell communication; GO:0007165 signal transduction; GO:0009314 response to radiation; GO:0009416 response to light stimulus; GO:0009605 response to external stimulus; GO:0009606 tropism; GO:0009612 response to mechanical stimulus; GO:0009628 response to abiot…	GO:0005622 intracellular; GO:0005623 cell; GO:0005737 cytoplasm; GO:0005773 vacuole; GO:0005774 vacuolar membrane; GO:0005856 cytoskeleton; GO:0005874 microtubule; GO:0005911 cell-cell junction; GO:0009506 plasmodesma; GO:0015630 microtubule cytoskeleton; GO:0016020 membrane; GO:0030054 cell junction; GO:0031090 organelle membrane; GO:0043226 organelle; GO:0043227 membrane-bounded organelle; GO:0…	GO:0005488 binding; GO:0005509 calcium ion binding; GO:0043167 ion binding; GO:0043169 cation binding; GO:0046872 metal ion binding;	PF13833; PF13499	EF-hand domain pair; EF-hand domain pair	T	KOG0027	Calmodulin and related proteins (EF-Hand superfamily)
F4JRE7	AT4G12720	MutT/nudix family protein OS=Arabidopsis thaliana OX=3702 GN=NUDT7 PE=4 SV=1	NUDT7	1.314	0.000939992	Up	36.5	9	2	2	2	0.836	0.878	0.879	1.158	1.172	1.077	cytoplasm				GO:0006950 response to stress; GO:0006979 response to oxidative stress; GO:0009605 response to external stimulus; GO:0009607 response to biotic stimulus; GO:0009966 regulation of signal transduction; GO:0009967 positive regulation of signal transduction; GO:0010646 regulation of cell communication; GO:0010647 positive regulation of cell communication; GO:0023051 regulation of signaling; GO:002305…	GO:0005622 intracellular; GO:0005623 cell; GO:0005634 nucleus; GO:0005737 cytoplasm; GO:0005829 cytosol; GO:0005886 plasma membrane; GO:0016020 membrane; GO:0043226 organelle; GO:0043227 membrane-bounded organelle; GO:0043229 intracellular organelle; GO:0043231 intracellular membrane-bounded organelle; GO:0044424 intracellular part; GO:0044444 cytoplasmic part; GO:0044464 cell part; GO:0071944 ce…	GO:0000166 nucleotide binding; GO:0003824 catalytic activity; GO:0004551 nucleotide diphosphatase activity; GO:0005488 binding; GO:0016462 pyrophosphatase activity; GO:0016787 hydrolase activity; GO:0016817 hydrolase activity, acting on acid anhydrides; GO:0016818 hydrolase activity, acting on acid anhydrides, in phosphorus-containing anhydrides; GO:0035529 NADH pyrophosphatase activity; GO:00360…	PF00293	NUDIX domain	T	KOG0648	Predicted NUDIX hydrolase FGF-2 and related proteins
F4K6M8	AT5G07340	Calreticulin family protein OS=Arabidopsis thaliana OX=3702 GN=At5g07340 PE=3 SV=1	At5g07340	1.773	5.30214e-05	Up	61.4	22	12	22	7	0.755	0.7	0.71	1.309	1.303	1.226	plasma membrane	K08054	CANX; calnexin	map04141 Protein processing in endoplasmic reticulum; map04145 Phagosome		GO:0005618 cell wall; GO:0005622 intracellular; GO:0005623 cell; GO:0005737 cytoplasm; GO:0005739 mitochondrion; GO:0005773 vacuole; GO:0005774 vacuolar membrane; GO:0005783 endoplasmic reticulum; GO:0005886 plasma membrane; GO:0005911 cell-cell junction; GO:0009505 plant-type cell wall; GO:0009506 plasmodesma; GO:0009507 chloroplast; GO:0009536 plastid; GO:0012505 endomembrane system; GO:0016020…				O	KOG0675	Calnexin
O04151	AT1G56340	Calreticulin-1 OS=Arabidopsis thaliana OX=3702 GN=CRT1 PE=1 SV=1	CRT1	1.349	0.0209476	Up	48.5	32	9	11	6	0.893	0.841	0.848	1.211	1.279	0.992	endoplasmic reticulum	K08057	CALR; calreticulin	map04141 Protein processing in endoplasmic reticulum; map04145 Phagosome	GO:0006950 response to stress; GO:0006970 response to osmotic stress; GO:0006979 response to oxidative stress; GO:0009628 response to abiotic stimulus; GO:0009651 response to salt stress; GO:0010035 response to inorganic substance; GO:0010038 response to metal ion; GO:0042221 response to chemical; GO:0046686 response to cadmium ion; GO:0050896 response to stimulus;	GO:0005576 extracellular region; GO:0005622 intracellular; GO:0005623 cell; GO:0005737 cytoplasm; GO:0005739 mitochondrion; GO:0005773 vacuole; GO:0005774 vacuolar membrane; GO:0005783 endoplasmic reticulum; GO:0005788 endoplasmic reticulum lumen; GO:0005911 cell-cell junction; GO:0009506 plasmodesma; GO:0009507 chloroplast; GO:0009536 plastid; GO:0012505 endomembrane system; GO:0016020 membrane;…				O	KOG0674	Calreticulin
O22263	AT2G47470	Protein disulfide-isomerase like 2-1 OS=Arabidopsis thaliana OX=3702 GN=PDIL2-1 PE=2 SV=1	PDIL2-1	1.405	0.000163337	Up	39.5	40	12	31	11	0.82	0.868	0.8	1.152	1.172	1.172	extracellular	K09584	PDIA6, TXNDC7; protein disulfide-isomerase A6 [EC:5.3.4.1]	map04141 Protein processing in endoplasmic reticulum	GO:0000003 reproduction; GO:0003006 developmental process involved in reproduction; GO:0006457 protein folding; GO:0006950 response to stress; GO:0007275 multicellular organism development; GO:0009553 embryo sac development; GO:0009566 fertilization; GO:0009567 double fertilization forming a zygote and endosperm; GO:0009790 embryo development; GO:0009791 post-embryonic development; GO:0009793 emb…	GO:0005618 cell wall; GO:0005622 intracellular; GO:0005623 cell; GO:0005737 cytoplasm; GO:0005773 vacuole; GO:0005774 vacuolar membrane; GO:0005783 endoplasmic reticulum; GO:0009505 plant-type cell wall; GO:0012505 endomembrane system; GO:0016020 membrane; GO:0030312 external encapsulating structure; GO:0031090 organelle membrane; GO:0043226 organelle; GO:0043227 membrane-bounded organelle; GO:00…	GO:0003756 protein disulfide isomerase activity; GO:0003824 catalytic activity; GO:0016853 isomerase activity; GO:0016860 intramolecular oxidoreductase activity; GO:0016864 intramolecular oxidoreductase activity, transposing S-S bonds;	PF00085; PF07749	Thioredoxin; Endoplasmic reticulum protein ERp29, C-terminal domain	O	KOG0191	Thioredoxin/protein disulfide isomerase
O23298	AT4G14420	AT4g14420/dl3250c OS=Arabidopsis thaliana OX=3702 GN=dl3250c PE=2 SV=1	dl3250c	1.306	0.00970765	Up	17.4	5	1	2	1	0.805	0.846	0.951	1.172	1.161	1.066	plasma membrane
O48723	AT2G26560	Patatin-like protein 2 OS=Arabidopsis thaliana OX=3702 GN=PLP2 PE=1 SV=1	PLP2	1.307	0.0182458	Up	44.2	15	4	5	4	0.762	0.888	0.95	1.094	1.193	1.112	chloroplast				GO:0001666 response to hypoxia; GO:0002252 immune effector process; GO:0002376 immune system process; GO:0006082 organic acid metabolic process; GO:0006629 lipid metabolic process; GO:0006631 fatty acid metabolic process; GO:0006633 fatty acid biosynthetic process; GO:0006950 response to stress; GO:0006952 defense response; GO:0006955 immune response; GO:0008152 metabolic process; GO:0008219 cell…	GO:0005622 intracellular; GO:0005623 cell; GO:0005737 cytoplasm; GO:0016020 membrane; GO:0044424 intracellular part; GO:0044464 cell part;	GO:0003824 catalytic activity; GO:0004620 phospholipase activity; GO:0016298 lipase activity; GO:0016787 hydrolase activity; GO:0016788 hydrolase activity, acting on ester bonds; GO:0047372 acylglycerol lipase activity; GO:0052689 carboxylic ester hydrolase activity;			I	KOG0513	Ca2+-independent phospholipase A2
O48773	AT2G32920	Protein disulfide-isomerase 2-3 OS=Arabidopsis thaliana OX=3702 GN=PDIL2-3 PE=2 SV=1	PDIL2-3	1.597	5.16181e-06	Up	47.7	22	7	12	7	0.762	0.771	0.784	1.216	1.262	1.222	extracellular	K09584	PDIA6, TXNDC7; protein disulfide-isomerase A6 [EC:5.3.4.1]	map04141 Protein processing in endoplasmic reticulum	GO:0006457 protein folding; GO:0006950 response to stress; GO:0009987 cellular process; GO:0033554 cellular response to stress; GO:0034976 response to endoplasmic reticulum stress; GO:0050896 response to stimulus; GO:0051716 cellular response to stimulus;	GO:0005618 cell wall; GO:0005622 intracellular; GO:0005623 cell; GO:0005737 cytoplasm; GO:0005773 vacuole; GO:0005783 endoplasmic reticulum; GO:0005788 endoplasmic reticulum lumen; GO:0005794 Golgi apparatus; GO:0005886 plasma membrane; GO:0009505 plant-type cell wall; GO:0012505 endomembrane system; GO:0016020 membrane; GO:0030312 external encapsulating structure; GO:0031974 membrane-enclosed lu…	GO:0003756 protein disulfide isomerase activity; GO:0003824 catalytic activity; GO:0016853 isomerase activity; GO:0016860 intramolecular oxidoreductase activity; GO:0016864 intramolecular oxidoreductase activity, transposing S-S bonds;	PF00085	Thioredoxin	O	KOG0191	Thioredoxin/protein disulfide isomerase
O64503	AT2G02810	UDP-galactose/UDP-glucose transporter 1 OS=Arabidopsis thaliana OX=3702 GN=UTR1 PE=1 SV=1	UTR1	2.184	0.00031395	Up	36.9	3	1	1	1	0.577	0.674	0.634	1.313	1.292	1.511	plasma membrane	K15275	SLC35B1; solute carrier family 35 (UDP-galactose transporter), member B1		GO:0006810 transport; GO:0006811 ion transport; GO:0006820 anion transport; GO:0006950 response to stress; GO:0006986 response to unfolded protein; GO:0007154 cell communication; GO:0007165 signal transduction; GO:0007275 multicellular organism development; GO:0009553 embryo sac development; GO:0009555 pollen development; GO:0009987 cellular process; GO:0010033 response to organic substance; GO:0…	GO:0000139 Golgi membrane; GO:0005622 intracellular; GO:0005623 cell; GO:0005737 cytoplasm; GO:0005783 endoplasmic reticulum; GO:0005789 endoplasmic reticulum membrane; GO:0005794 Golgi apparatus; GO:0012505 endomembrane system; GO:0016020 membrane; GO:0016021 integral component of membrane; GO:0030173 integral component of Golgi membrane; GO:0030176 integral component of endoplasmic reticulum me…	GO:0005215 transporter activity; GO:0005338 nucleotide-sugar transmembrane transporter activity; GO:0005459 UDP-galactose transmembrane transporter activity; GO:0005460 UDP-glucose transmembrane transporter activity; GO:0008509 anion transmembrane transporter activity; GO:0008514 organic anion transmembrane transporter activity; GO:0015075 ion transmembrane transporter activity; GO:0015165 pyrimi…			G	KOG1581	UDP-galactose transporter related protein
O81062	AT2G03120	Signal peptide peptidase OS=Arabidopsis thaliana OX=3702 GN=SPP PE=2 SV=1	SPP	1.377	0.000523014	Up	38.3	6	2	3	2	0.792	0.851	0.881	1.161	1.152	1.162	plasma membrane	K09595	HM13; minor histocompatibility antigen H13 [EC:3.4.23.-]		GO:0000003 reproduction; GO:0006508 proteolysis; GO:0006807 nitrogen compound metabolic process; GO:0006810 transport; GO:0006886 intracellular protein transport; GO:0006950 response to stress; GO:0007275 multicellular organism development; GO:0008104 protein localization; GO:0008152 metabolic process; GO:0009056 catabolic process; GO:0009057 macromolecule catabolic process; GO:0009555 pollen dev…	GO:0000323 lytic vacuole; GO:0005622 intracellular; GO:0005623 cell; GO:0005737 cytoplasm; GO:0005764 lysosome; GO:0005765 lysosomal membrane; GO:0005773 vacuole; GO:0005774 vacuolar membrane; GO:0005783 endoplasmic reticulum; GO:0005789 endoplasmic reticulum membrane; GO:0005791 rough endoplasmic reticulum; GO:0005798 Golgi-associated vesicle; GO:0009986 cell surface; GO:0012505 endomembrane sys…	GO:0003824 catalytic activity; GO:0004175 endopeptidase activity; GO:0004190 aspartic-type endopeptidase activity; GO:0005488 binding; GO:0005515 protein binding; GO:0008233 peptidase activity; GO:0016787 hydrolase activity; GO:0019899 enzyme binding; GO:0031625 ubiquitin protein ligase binding; GO:0042500 aspartic endopeptidase activity, intramembrane cleaving; GO:0042802 identical protein bindi…			S	KOG2443	Uncharacterized conserved protein
O82382	AT2G29740	UDP-glycosyltransferase 71C2 OS=Arabidopsis thaliana OX=3702 GN=UGT71C2 PE=1 SV=1	UGT71C2	1.318	0.000306285	Up	53.2	11	4	5	4	0.832	0.885	0.871	1.138	1.108	1.166	chloroplast				GO:0001101 response to acid chemical; GO:0006066 alcohol metabolic process; GO:0006082 organic acid metabolic process; GO:0006629 lipid metabolic process; GO:0006714 sesquiterpenoid metabolic process; GO:0006720 isoprenoid metabolic process; GO:0006721 terpenoid metabolic process; GO:0006950 response to stress; GO:0006970 response to osmotic stress; GO:0008152 metabolic process; GO:0008300 isopre…	GO:0005622 intracellular; GO:0005623 cell; GO:0005737 cytoplasm; GO:0005829 cytosol; GO:0016020 membrane; GO:0043226 organelle; GO:0043227 membrane-bounded organelle; GO:0043229 intracellular organelle; GO:0043231 intracellular membrane-bounded organelle; GO:0044424 intracellular part; GO:0044444 cytoplasmic part; GO:0044464 cell part;	GO:0003824 catalytic activity; GO:0008194 UDP-glycosyltransferase activity; GO:0010294 abscisic acid glucosyltransferase activity; GO:0016740 transferase activity; GO:0016757 transferase activity, transferring glycosyl groups; GO:0016758 transferase activity, transferring hexosyl groups; GO:0035251 UDP-glucosyltransferase activity; GO:0046527 glucosyltransferase activity; GO:0080043 quercetin 3-O…			CG	KOG1192	UDP-glucuronosyl and UDP-glucosyl transferase
O82772	AT3G03640	Probable inactive beta-glucosidase 25 OS=Arabidopsis thaliana OX=3702 GN=BGLU25 PE=2 SV=1	BGLU25	2.035	3.95327e-06	Up	59.8	19	10	14	10	0.675	0.654	0.631	1.34	1.315	1.334	vacuolar membrane	K01188	E3.2.1.21; beta-glucosidase [EC:3.2.1.21]	map00460 Cyanoamino acid metabolism; map00500 Starch and sucrose metabolism; map00940 Phenylpropanoid biosynthesis; map01100 Metabolic pathways; map01110 Biosynthesis of secondary metabolites	GO:0008152 metabolic process; GO:0071704 organic substance metabolic process; GO:1901135 carbohydrate derivative metabolic process; GO:1901657 glycosyl compound metabolic process;	GO:0005622 intracellular; GO:0005623 cell; GO:0005737 cytoplasm; GO:0005783 endoplasmic reticulum; GO:0012505 endomembrane system; GO:0043226 organelle; GO:0043227 membrane-bounded organelle; GO:0043229 intracellular organelle; GO:0043231 intracellular membrane-bounded organelle; GO:0044424 intracellular part; GO:0044444 cytoplasmic part; GO:0044464 cell part;	GO:0003824 catalytic activity; GO:0004553 hydrolase activity, hydrolyzing O-glycosyl compounds; GO:0008422 beta-glucosidase activity; GO:0015926 glucosidase activity; GO:0016787 hydrolase activity; GO:0016798 hydrolase activity, acting on glycosyl bonds;	PF00232	Glycosyl hydrolase family 1	G	KOG0626	Beta-glucosidase, lactase phlorizinhydrolase, and related proteins
P15455	AT5G44120	12S seed storage protein CRA1 OS=Arabidopsis thaliana OX=3702 GN=CRA1 PE=1 SV=2	CRA1	1.787	0.0202974	Up	52.6	5	2	2	2	0.518	0.877	0.758	1.351	1.189	1.307	vacuolar membrane				GO:0000003 reproduction; GO:0001101 response to acid chemical; GO:0003006 developmental process involved in reproduction; GO:0007275 multicellular organism development; GO:0009719 response to endogenous stimulus; GO:0009725 response to hormone; GO:0009735 response to cytokinin; GO:0009737 response to abscisic acid; GO:0009791 post-embryonic development; GO:0009987 cellular process; GO:0010033 res…	GO:0005622 intracellular; GO:0005623 cell; GO:0005737 cytoplasm; GO:0005773 vacuole; GO:0031410 cytoplasmic vesicle; GO:0031982 vesicle; GO:0033095 aleurone grain; GO:0043226 organelle; GO:0043227 membrane-bounded organelle; GO:0043229 intracellular organelle; GO:0043231 intracellular membrane-bounded organelle; GO:0044424 intracellular part; GO:0044444 cytoplasmic part; GO:0044464 cell part; GO:…	GO:0045735 nutrient reservoir activity;	PF00190	Cupin
P29402	AT5G61790	Calnexin homolog 1 OS=Arabidopsis thaliana OX=3702 GN=CNX1 PE=1 SV=1	CNX1	1.873	2.24026e-05	Up	60.4	37	17	43	11	0.724	0.673	0.709	1.359	1.301	1.284	plasma membrane	K08054	CANX; calnexin	map04141 Protein processing in endoplasmic reticulum; map04145 Phagosome		GO:0005618 cell wall; GO:0005622 intracellular; GO:0005623 cell; GO:0005737 cytoplasm; GO:0005739 mitochondrion; GO:0005773 vacuole; GO:0005774 vacuolar membrane; GO:0005783 endoplasmic reticulum; GO:0005886 plasma membrane; GO:0005911 cell-cell junction; GO:0009505 plant-type cell wall; GO:0009506 plasmodesma; GO:0009507 chloroplast; GO:0009536 plastid; GO:0012505 endomembrane system; GO:0016020…				O	KOG0675	Calnexin
P42760	AT1G02930	Glutathione S-transferase F6 OS=Arabidopsis thaliana OX=3702 GN=GSTF6 PE=2 SV=2	GSTF6	1.328	0.0246253	Up	23.5	36	7	25	2	0.729	0.892	0.956	1.152	1.109	1.161	cytoplasm	K00799	GST, gst; glutathione S-transferase [EC:2.5.1.18]	map00480 Glutathione metabolism; map01100 Metabolic pathways	GO:0001101 response to acid chemical; GO:0002239 response to oomycetes; GO:0002376 immune system process; GO:0006518 peptide metabolic process; GO:0006575 cellular modified amino acid metabolic process; GO:0006749 glutathione metabolic process; GO:0006790 sulfur compound metabolic process; GO:0006807 nitrogen compound metabolic process; GO:0006950 response to stress; GO:0006952 defense response; …	GO:0005576 extracellular region; GO:0005618 cell wall; GO:0005622 intracellular; GO:0005623 cell; GO:0005634 nucleus; GO:0005737 cytoplasm; GO:0005739 mitochondrion; GO:0005773 vacuole; GO:0005774 vacuolar membrane; GO:0005829 cytosol; GO:0005886 plasma membrane; GO:0005911 cell-cell junction; GO:0009506 plasmodesma; GO:0009507 chloroplast; GO:0009526 plastid envelope; GO:0009532 plastid stroma; …	GO:0003824 catalytic activity; GO:0004364 glutathione transferase activity; GO:0005488 binding; GO:0005507 copper ion binding; GO:0005515 protein binding; GO:0008144 drug binding; GO:0016740 transferase activity; GO:0016765 transferase activity, transferring alkyl or aryl (other than methyl) groups; GO:0019904 protein domain specific binding; GO:0033218 amide binding; GO:0042277 peptide binding; …	PF02798; PF00043	Glutathione S-transferase, N-terminal domain; Glutathione S-transferase, C-terminal domain	O	KOG0867	Glutathione S-transferase
P59833	AT5G19250	Uncharacterized GPI-anchored protein At5g19250 OS=Arabidopsis thaliana OX=3702 GN=At5g19250 PE=2 SV=1	At5g19250	1.817	0.00277492	Up	21	15	1	1	1	0.639	0.661	0.83	1.264	1.393	1.214	plasma membrane					GO:0005623 cell; GO:0005886 plasma membrane; GO:0016020 membrane; GO:0031224 intrinsic component of membrane; GO:0031225 anchored component of membrane; GO:0031226 intrinsic component of plasma membrane; GO:0044425 membrane part; GO:0044459 plasma membrane part; GO:0044464 cell part; GO:0046658 anchored component of plasma membrane; GO:0071944 cell periphery;
Q38858	AT1G09210	Calreticulin-2 OS=Arabidopsis thaliana OX=3702 GN=CRT2 PE=1 SV=3	CRT2	1.367	0.00663779	Up	48.1	18	5	5	2	0.872	0.753	0.909	1.153	1.199	1.113	endoplasmic reticulum	K08057	CALR; calreticulin	map04141 Protein processing in endoplasmic reticulum; map04145 Phagosome	GO:0006950 response to stress; GO:0006970 response to osmotic stress; GO:0006979 response to oxidative stress; GO:0009628 response to abiotic stimulus; GO:0009651 response to salt stress; GO:0010035 response to inorganic substance; GO:0010038 response to metal ion; GO:0042221 response to chemical; GO:0046686 response to cadmium ion; GO:0050896 response to stimulus;	GO:0005576 extracellular region; GO:0005622 intracellular; GO:0005623 cell; GO:0005737 cytoplasm; GO:0005739 mitochondrion; GO:0005773 vacuole; GO:0005774 vacuolar membrane; GO:0005783 endoplasmic reticulum; GO:0005788 endoplasmic reticulum lumen; GO:0005911 cell-cell junction; GO:0009506 plasmodesma; GO:0009507 chloroplast; GO:0009536 plastid; GO:0012505 endomembrane system; GO:0016020 membrane;…				O	KOG0674	Calreticulin
Q39140	AT3G12250	Transcription factor TGA6 OS=Arabidopsis thaliana OX=3702 GN=TGA6 PE=1 SV=2	TGA6	1.65	0.00344302	Up	36.8	3	1	3	1	0.646	0.795	0.823	1.26	1.174	1.302	nucleus	K14431	TGA; transcription factor TGA	map04075 Plant hormone signal transduction	GO:0001101 response to acid chemical; GO:0002376 immune system process; GO:0006355 regulation of transcription, DNA-templated; GO:0006950 response to stress; GO:0006952 defense response; GO:0006955 immune response; GO:0007154 cell communication; GO:0007165 signal transduction; GO:0009605 response to external stimulus; GO:0009607 response to biotic stimulus; GO:0009617 response to bacterium; GO:00…	GO:0005622 intracellular; GO:0005623 cell; GO:0005634 nucleus; GO:0005737 cytoplasm; GO:0043226 organelle; GO:0043227 membrane-bounded organelle; GO:0043229 intracellular organelle; GO:0043231 intracellular membrane-bounded organelle; GO:0044424 intracellular part; GO:0044464 cell part;	GO:0003676 nucleic acid binding; GO:0003677 DNA binding; GO:0003700 transcription factor activity, sequence-specific DNA binding; GO:0005488 binding; GO:0005515 protein binding; GO:0042802 identical protein binding; GO:0043565 sequence-specific DNA binding; GO:0097159 organic cyclic compound binding; GO:1901363 heterocyclic compound binding;
Q41906	AT2G40880	Cysteine proteinase inhibitor 3 OS=Arabidopsis thaliana OX=3702 GN=CYS3 PE=2 SV=2	CYS3	2.663	0.00824616	Up	14.4	10	1	2	1	0.395	0.531	0.712	1.4	1.767	1.195	extracellular				GO:0001101 response to acid chemical; GO:0006950 response to stress; GO:0006970 response to osmotic stress; GO:0006972 hyperosmotic response; GO:0006979 response to oxidative stress; GO:0009266 response to temperature stimulus; GO:0009409 response to cold; GO:0009414 response to water deprivation; GO:0009415 response to water; GO:0009628 response to abiotic stimulus; GO:0009892 negative regulatio…		GO:0002020 protease binding; GO:0004857 enzyme inhibitor activity; GO:0004866 endopeptidase inhibitor activity; GO:0004869 cysteine-type endopeptidase inhibitor activity; GO:0005488 binding; GO:0005515 protein binding; GO:0019899 enzyme binding; GO:0030234 enzyme regulator activity; GO:0030414 peptidase inhibitor activity; GO:0061134 peptidase regulator activity; GO:0061135 endopeptidase regulato…
Q501E6	AT5G25250	Flotillin-like protein 1 OS=Arabidopsis thaliana OX=3702 GN=FLOT1 PE=2 SV=1	FLOT1	1.324	0.00759453	Up	52.3	8	3	3	3	0.786	0.83	0.934	1.096	1.183	1.098	mitochondria	K07192	FLOT; flotillin		GO:0001666 response to hypoxia; GO:0006810 transport; GO:0006897 endocytosis; GO:0006950 response to stress; GO:0009628 response to abiotic stimulus; GO:0009987 cellular process; GO:0010324 membrane invagination; GO:0016043 cellular component organization; GO:0016192 vesicle-mediated transport; GO:0033554 cellular response to stress; GO:0036293 response to decreased oxygen levels; GO:0036294 cell…	GO:0005622 intracellular; GO:0005623 cell; GO:0005737 cytoplasm; GO:0005768 endosome; GO:0005773 vacuole; GO:0005774 vacuolar membrane; GO:0005886 plasma membrane; GO:0005911 cell-cell junction; GO:0009506 plasmodesma; GO:0012505 endomembrane system; GO:0016020 membrane; GO:0030054 cell junction; GO:0031090 organelle membrane; GO:0031410 cytoplasmic vesicle; GO:0031982 vesicle; GO:0043226 organel…				UZ	KOG2668	Flotillins
Q84JN2	AT5G64510	Tunicamycin induced protein OS=Arabidopsis thaliana OX=3702 GN=TIN1 PE=2 SV=1	TIN1	2.217	0.00081474	Up	46.4	13	4	7	4	0.576	0.534	0.705	1.385	1.378	1.261	chloroplast
Q84K46	AT1G27330	At1g27330 OS=Arabidopsis thaliana OX=3702 GN=At1g27330 PE=2 SV=1	At1g27330	2.017	0.000159146	Up	7.5	13	1	5	1	0.619	0.671	0.699	1.336	1.254	1.421	cytoplasm									T	KOG3491	Predicted membrane protein
Q8GWH3	AT5G35080	Protein OS-9 homolog OS=Arabidopsis thaliana OX=3702 GN=OS9 PE=1 SV=1	OS9	1.443	0.0463329	Up	32.2	2	1	1	1	0.785	0.861	0.81	1.283	1.345	0.916	vacuolar membrane	K10088	OS9; protein OS-9	map04141 Protein processing in endoplasmic reticulum	GO:0006508 proteolysis; GO:0006511 ubiquitin-dependent protein catabolic process; GO:0006807 nitrogen compound metabolic process; GO:0006810 transport; GO:0006886 intracellular protein transport; GO:0006950 response to stress; GO:0006970 response to osmotic stress; GO:0008104 protein localization; GO:0008152 metabolic process; GO:0009056 catabolic process; GO:0009057 macromolecule catabolic proce…	GO:0005622 intracellular; GO:0005623 cell; GO:0005737 cytoplasm; GO:0005783 endoplasmic reticulum; GO:0005788 endoplasmic reticulum lumen; GO:0012505 endomembrane system; GO:0031974 membrane-enclosed lumen; GO:0043226 organelle; GO:0043227 membrane-bounded organelle; GO:0043229 intracellular organelle; GO:0043231 intracellular membrane-bounded organelle; GO:0043233 organelle lumen; GO:0044422 org…				S	KOG3394	Protein OS-9
Q8H1B3	AT1G09080	Heat shock 70 kDa protein BIP3 OS=Arabidopsis thaliana OX=3702 GN=BIP3 PE=1 SV=1	BIP3	4.869	8.57011e-07	Up	75.1	29	17	34	14	0.334	0.338	0.344	1.696	1.698	1.553	cytoplasm	K09490	HSPA5, BIP; heat shock 70kDa protein 5	map03060 Protein export; map04141 Protein processing in endoplasmic reticulum	GO:0000003 reproduction; GO:0000902 cell morphogenesis; GO:0000904 cell morphogenesis involved in differentiation; GO:0003006 developmental process involved in reproduction; GO:0009653 anatomical structure morphogenesis; GO:0009826 unidimensional cell growth; GO:0009856 pollination; GO:0009860 pollen tube growth; GO:0009932 cell tip growth; GO:0009987 cellular process; GO:0016043 cellular compone…	GO:0005622 intracellular; GO:0005623 cell; GO:0005634 nucleus; GO:0005654 nucleoplasm; GO:0005737 cytoplasm; GO:0005783 endoplasmic reticulum; GO:0005788 endoplasmic reticulum lumen; GO:0012505 endomembrane system; GO:0016592 mediator complex; GO:0031974 membrane-enclosed lumen; GO:0031981 nuclear lumen; GO:0032991 macromolecular complex; GO:0043226 organelle; GO:0043227 membrane-bounded organell…				O	KOG0100	Molecular chaperones GRP78/BiP/KAR2, HSP70 superfamily
Q8L9S0	AT1G29060	Bet1-like protein At1g29060 OS=Arabidopsis thaliana OX=3702 GN=At1g29060 PE=2 SV=1	At1g29060	1.949	0.000198381	Up	15.1	27	3	7	2	0.613	0.717	0.705	1.292	1.35	1.324	Golgi apparatus	K08505	SFT1; protein transport protein SFT1	map04130 SNARE interactions in vesicular transport	GO:0006873 cellular ion homeostasis; GO:0006875 cellular metal ion homeostasis; GO:0006883 cellular sodium ion homeostasis; GO:0009987 cellular process; GO:0019725 cellular homeostasis; GO:0030003 cellular cation homeostasis; GO:0030004 cellular monovalent inorganic cation homeostasis; GO:0042592 homeostatic process; GO:0043181 vacuolar sequestering; GO:0043182 vacuolar sequestering of sodium ion…	GO:0005622 intracellular; GO:0005623 cell; GO:0005737 cytoplasm; GO:0005794 Golgi apparatus; GO:0005886 plasma membrane; GO:0012505 endomembrane system; GO:0016020 membrane; GO:0043226 organelle; GO:0043227 membrane-bounded organelle; GO:0043229 intracellular organelle; GO:0043231 intracellular membrane-bounded organelle; GO:0044424 intracellular part; GO:0044444 cytoplasmic part; GO:0044464 cell…				K	KOG1267	Mitochondrial transcription termination factor, mTERF
Q8RXX9	AT3G05200	E3 ubiquitin-protein ligase ATL6 OS=Arabidopsis thaliana OX=3702 GN=ATL6 PE=1 SV=2	ATL6	1.373	0.00597496	Up	43.2	6	2	3	2	0.822	0.79	0.916	1.24	1.151	1.08	chloroplast	K10664	ATL6S; E3 ubiquitin-protein ligase ATL6/9/15/31/42/55 [EC:2.3.2.27]		GO:0001101 response to acid chemical; GO:0002376 immune system process; GO:0006464 cellular protein modification process; GO:0006508 proteolysis; GO:0006511 ubiquitin-dependent protein catabolic process; GO:0006807 nitrogen compound metabolic process; GO:0006950 response to stress; GO:0006952 defense response; GO:0006955 immune response; GO:0007154 cell communication; GO:0007584 response to nutri…	GO:0005623 cell; GO:0005886 plasma membrane; GO:0016020 membrane; GO:0044464 cell part; GO:0071944 cell periphery;	GO:0003824 catalytic activity; GO:0004842 ubiquitin-protein transferase activity; GO:0016740 transferase activity; GO:0019787 ubiquitin-like protein transferase activity; GO:0061630 ubiquitin protein ligase activity; GO:0061659 ubiquitin-like protein ligase activity;	PF13639	Ring finger domain	O	KOG0800	FOG: Predicted E3 ubiquitin ligase
Q8VX13	AT3G54960	Protein disulfide isomerase-like 1-3 OS=Arabidopsis thaliana OX=3702 GN=PDIL1-3 PE=2 SV=1	PDIL1-3	1.854	1.4541e-05	Up	64.2	11	6	12	6	0.706	0.696	0.715	1.295	1.366	1.263	chloroplast	K09580	PDIA1, P4HB; protein disulfide-isomerase A1 [EC:5.3.4.1]	map04141 Protein processing in endoplasmic reticulum	GO:0006457 protein folding; GO:0006950 response to stress; GO:0006979 response to oxidative stress; GO:0009987 cellular process; GO:0033554 cellular response to stress; GO:0034976 response to endoplasmic reticulum stress; GO:0050896 response to stimulus; GO:0051716 cellular response to stimulus;	GO:0005622 intracellular; GO:0005623 cell; GO:0005737 cytoplasm; GO:0005739 mitochondrion; GO:0005773 vacuole; GO:0005774 vacuolar membrane; GO:0005783 endoplasmic reticulum; GO:0009507 chloroplast; GO:0009536 plastid; GO:0012505 endomembrane system; GO:0016020 membrane; GO:0031090 organelle membrane; GO:0043226 organelle; GO:0043227 membrane-bounded organelle; GO:0043229 intracellular organelle;…	GO:0003756 protein disulfide isomerase activity; GO:0003824 catalytic activity; GO:0016853 isomerase activity; GO:0016860 intramolecular oxidoreductase activity; GO:0016864 intramolecular oxidoreductase activity, transposing S-S bonds;	PF00085; PF13848	Thioredoxin; Thioredoxin-like domain	O	KOG0190	Protein disulfide isomerase (prolyl 4-hydroxylase beta subunit)
Q93WB8	AT3G13410	2-C-methyl-D-erythritol 4-phosphate cytidylyltransferase OS=Arabidopsis thaliana OX=3702 GN=At3g13410 PE=2 SV=1	At3g13410	1.365	7.91842e-05	Up	35	25	5	6	5	0.84	0.844	0.859	1.117	1.179	1.176	extracellular
Q93ZE8	AT2G25110	Stromal cell-derived factor 2-like protein OS=Arabidopsis thaliana OX=3702 GN=SDF2 PE=1 SV=1	SDF2	1.532	6.69232e-05	Up	23.9	19	4	11	4	0.749	0.81	0.8	1.196	1.202	1.217	extracellular				GO:0002682 regulation of immune system process; GO:0002684 positive regulation of immune system process; GO:0006464 cellular protein modification process; GO:0006486 protein glycosylation; GO:0006807 nitrogen compound metabolic process; GO:0006950 response to stress; GO:0006952 defense response; GO:0008152 metabolic process; GO:0009058 biosynthetic process; GO:0009059 macromolecule biosynthetic p…	GO:0005622 intracellular; GO:0005623 cell; GO:0005737 cytoplasm; GO:0005783 endoplasmic reticulum; GO:0012505 endomembrane system; GO:0043226 organelle; GO:0043227 membrane-bounded organelle; GO:0043229 intracellular organelle; GO:0043231 intracellular membrane-bounded organelle; GO:0044424 intracellular part; GO:0044444 cytoplasmic part; GO:0044464 cell part;	GO:0000030 mannosyltransferase activity; GO:0003824 catalytic activity; GO:0016740 transferase activity; GO:0016757 transferase activity, transferring glycosyl groups; GO:0016758 transferase activity, transferring hexosyl groups;	PF02815	MIR domain	O	KOG3358	Uncharacterized secreted protein SDF2 (Stromal cell-derived factor 2), contains MIR domains
Q9ASY9	AT3G16990	Bifunctional TENA-E protein OS=Arabidopsis thaliana OX=3702 GN=TENA_E PE=1 SV=3	TENA_E	1.309	8.47e-05	Up	25.1	21	5	6	5	0.894	0.883	0.848	1.139	1.156	1.141	chloroplast	K20896	TENA_E; formylaminopyrimidine deformylase / aminopyrimidine aminohydrolase [EC:3.5.1.- 3.5.99.-]	map00730 Thiamine metabolism; map01100 Metabolic pathways		GO:0005622 intracellular; GO:0005623 cell; GO:0005737 cytoplasm; GO:0005829 cytosol; GO:0044424 intracellular part; GO:0044444 cytoplasmic part; GO:0044464 cell part;
Q9C7S7	AT1G72280	Endoplasmic reticulum oxidoreductin-1 OS=Arabidopsis thaliana OX=3702 GN=AERO1 PE=1 SV=1	AERO1	1.74	0.000381675	Up	53.8	8	3	3	3	0.668	0.757	0.765	1.247	1.23	1.334	nucleus	K10976	ERO1LB; ERO1-like protein beta [EC:1.8.4.-]	map04141 Protein processing in endoplasmic reticulum	GO:0006457 protein folding; GO:0006464 cellular protein modification process; GO:0006807 nitrogen compound metabolic process; GO:0008152 metabolic process; GO:0009987 cellular process; GO:0019538 protein metabolic process; GO:0034975 protein folding in endoplasmic reticulum; GO:0036211 protein modification process; GO:0043170 macromolecule metabolic process; GO:0043412 macromolecule modification;…	GO:0005622 intracellular; GO:0005623 cell; GO:0005737 cytoplasm; GO:0005783 endoplasmic reticulum; GO:0005789 endoplasmic reticulum membrane; GO:0012505 endomembrane system; GO:0016020 membrane; GO:0031984 organelle subcompartment; GO:0042175 nuclear outer membrane-endoplasmic reticulum membrane network; GO:0043226 organelle; GO:0043227 membrane-bounded organelle; GO:0043229 intracellular organel…	GO:0003756 protein disulfide isomerase activity; GO:0003824 catalytic activity; GO:0015035 protein disulfide oxidoreductase activity; GO:0015036 disulfide oxidoreductase activity; GO:0016491 oxidoreductase activity; GO:0016667 oxidoreductase activity, acting on a sulfur group of donors; GO:0016853 isomerase activity; GO:0016860 intramolecular oxidoreductase activity; GO:0016864 intramolecular oxi…			OU	KOG2608	Endoplasmic reticulum membrane-associated oxidoreductin involved in disulfide bond formation
Q9FM65	AT5G55730	Fasciclin-like arabinogalactan protein 1 OS=Arabidopsis thaliana OX=3702 GN=FLA1 PE=1 SV=1	FLA1	1.347	0.017023	Up	44.8	4	1	1	1	0.742	0.95	0.864	1.13	1.209	1.105	plasma membrane				GO:0007275 multicellular organism development; GO:0022622 root system development; GO:0032501 multicellular organismal process; GO:0032502 developmental process; GO:0048364 root development; GO:0048367 shoot system development; GO:0048731 system development; GO:0048856 anatomical structure development; GO:0099402 plant organ development;	GO:0005618 cell wall; GO:0005622 intracellular; GO:0005623 cell; GO:0005737 cytoplasm; GO:0005773 vacuole; GO:0005774 vacuolar membrane; GO:0005886 plasma membrane; GO:0016020 membrane; GO:0030312 external encapsulating structure; GO:0031090 organelle membrane; GO:0031224 intrinsic component of membrane; GO:0031225 anchored component of membrane; GO:0031226 intrinsic component of plasma membrane;…		PF02469	Fasciclin domain
Q9FME9	AT5G64400	CHCH domain protein OS=Arabidopsis thaliana OX=3702 GN=MSJ1.24 PE=2 SV=1	MSJ1.24	1.407	0.000582749	Up	14.4	25	3	5	3	0.822	0.868	0.803	1.208	1.188	1.111	chloroplast	K22758	CHCHD2; coiled-coil-helix-coiled-coil-helix domain-containing protein 2					PF06747	CHCH domain	S	KOG4090	Uncharacterized conserved protein
Q9FN75	AT5G17760	AAA-ATPase At5g17760 OS=Arabidopsis thaliana OX=3702 GN=At5g17760 PE=3 SV=1	At5g17760	2.141	0.000232492	Up	57.4	15	6	8	5	0.646	0.636	0.656	1.513	1.403	1.233	chloroplast				GO:0006810 transport; GO:0008104 protein localization; GO:0009987 cellular process; GO:0015031 protein transport; GO:0015833 peptide transport; GO:0016043 cellular component organization; GO:0022607 cellular component assembly; GO:0033036 macromolecule localization; GO:0034622 cellular macromolecular complex assembly; GO:0042886 amide transport; GO:0043933 macromolecular complex subunit organizat…	GO:0005622 intracellular; GO:0005623 cell; GO:0005737 cytoplasm; GO:0005739 mitochondrion; GO:0005886 plasma membrane; GO:0016020 membrane; GO:0043226 organelle; GO:0043227 membrane-bounded organelle; GO:0043229 intracellular organelle; GO:0043231 intracellular membrane-bounded organelle; GO:0044424 intracellular part; GO:0044444 cytoplasmic part; GO:0044464 cell part; GO:0071944 cell periphery;	GO:0005215 transporter activity; GO:0008320 protein transmembrane transporter activity; GO:0008565 protein transporter activity; GO:0022857 transmembrane transporter activity; GO:0022884 macromolecule transmembrane transporter activity; GO:0042887 amide transmembrane transporter activity; GO:1904680 peptide transmembrane transporter activity;	PF00004	ATPase family associated with various cellular activities (AAA)	O	KOG0743	AAA+-type ATPase
Q9FX85	AT1G49570	Peroxidase 10 OS=Arabidopsis thaliana OX=3702 GN=PER10 PE=1 SV=1	PER10	1.442	0.00355847	Up	38	7	2	2	2	0.768	0.827	0.862	1.262	1.209	1.072	chloroplast	K00430	E1.11.1.7; peroxidase [EC:1.11.1.7]	map00940 Phenylpropanoid biosynthesis; map01100 Metabolic pathways; map01110 Biosynthesis of secondary metabolites				PF00141	Peroxidase
Q9FXB0	AT1G56580	At1g56580/F25P12_18 OS=Arabidopsis thaliana OX=3702 GN=SMALLER WITH VARIABLE BRANCHES PE=2 SV=1	SMALLER	1.763	1.07253e-06	Up	18.4	43	5	10	5	0.713	0.731	0.724	1.271	1.256	1.296	cytoplasm
Q9LD45	AT5G47120	Bax inhibitor 1 OS=Arabidopsis thaliana OX=3702 GN=BI-1 PE=1 SV=1	BI-1	2.254	0.000118529	Up	27.5	3	1	1	1	0.561	0.622	0.661	1.323	1.45	1.384	plasma membrane	K21889	TMBIM6, BI1, TEGT; Bax inhibitor 1		GO:0000038 very long-chain fatty acid metabolic process; GO:0001101 response to acid chemical; GO:0006082 organic acid metabolic process; GO:0006629 lipid metabolic process; GO:0006631 fatty acid metabolic process; GO:0006950 response to stress; GO:0006983 ER overload response; GO:0006984 ER-nucleus signaling pathway; GO:0007154 cell communication; GO:0007165 signal transduction; GO:0008152 metab…	GO:0005622 intracellular; GO:0005623 cell; GO:0005634 nucleus; GO:0005635 nuclear envelope; GO:0005737 cytoplasm; GO:0005783 endoplasmic reticulum; GO:0012505 endomembrane system; GO:0031967 organelle envelope; GO:0031975 envelope; GO:0043226 organelle; GO:0043227 membrane-bounded organelle; GO:0043229 intracellular organelle; GO:0043231 intracellular membrane-bounded organelle; GO:0044422 organe…				V	KOG1629	Bax-mediated apoptosis inhibitor TEGT/BI-1
Q9LIH2	AT3G20920	Translocation protein-like protein OS=Arabidopsis thaliana OX=3702 GN=At3g20920 PE=2 SV=1	At3g20920	2.19	0.000349189	Up	41.9	2	1	1	1	0.637	0.622	0.622	1.557	1.327	1.235	nucleus	K12275	SEC62; translocation protein SEC62	map03060 Protein export; map04141 Protein processing in endoplasmic reticulum	GO:0006605 protein targeting; GO:0006612 protein targeting to membrane; GO:0006620 posttranslational protein targeting to membrane; GO:0006810 transport; GO:0006886 intracellular protein transport; GO:0008104 protein localization; GO:0015031 protein transport; GO:0015833 peptide transport; GO:0033036 macromolecule localization; GO:0033365 protein localization to organelle; GO:0034613 cellular pro…	GO:0005622 intracellular; GO:0005623 cell; GO:0005737 cytoplasm; GO:0005783 endoplasmic reticulum; GO:0005789 endoplasmic reticulum membrane; GO:0005791 rough endoplasmic reticulum; GO:0012505 endomembrane system; GO:0016020 membrane; GO:0030867 rough endoplasmic reticulum membrane; GO:0031090 organelle membrane; GO:0031205 endoplasmic reticulum Sec complex; GO:0031207 Sec62/Sec63 complex; GO:003…				U	KOG2927	Membrane component of ER protein translocation complex
Q9LIP9	AT3G24090	Glutamine-fructose-6-phosphate transaminase 2 OS=Arabidopsis thaliana OX=3702 GN=GFAT PE=4 SV=1	GFAT	1.452	0.000113532	Up	74.6	12	6	11	6	0.849	0.782	0.825	1.184	1.202	1.179	cytoplasm	K00820	glmS, GFPT; glutamine---fructose-6-phosphate transaminase (isomerizing) [EC:2.6.1.16]	map00250 Alanine, aspartate and glutamate metabolism; map00520 Amino sugar and nucleotide sugar metabolism; map01100 Metabolic pathways	GO:0006002 fructose 6-phosphate metabolic process; GO:0006040 amino sugar metabolic process; GO:0006047 UDP-N-acetylglucosamine metabolic process; GO:0006139 nucleobase-containing compound metabolic process; GO:0006464 cellular protein modification process; GO:0006486 protein glycosylation; GO:0006487 protein N-linked glycosylation; GO:0006725 cellular aromatic compound metabolic process; GO:0006…		GO:0003824 catalytic activity; GO:0004360 glutamine-fructose-6-phosphate transaminase (isomerizing) activity; GO:0008483 transaminase activity; GO:0016740 transferase activity; GO:0016769 transferase activity, transferring nitrogenous groups; GO:0070548 L-glutamine aminotransferase activity;	PF13522; PF01380	Glutamine amidotransferase domain; SIS domain	M	KOG1268	Glucosamine 6-phosphate synthetases, contain amidotransferase and phosphosugar isomerase domains
Q9LKG8	AT5G24590	NAC domain-containing protein 91 OS=Arabidopsis thaliana OX=3702 GN=NAC091 PE=1 SV=1	NAC091	1.36	0.00554246	Up	50.9	2	1	1	1	0.899	0.846	0.798	1.258	1.106	1.095	nucleus				GO:0002230 positive regulation of defense response to virus by host; GO:0002237 response to molecule of bacterial origin; GO:0002376 immune system process; GO:0002682 regulation of immune system process; GO:0002697 regulation of immune effector process; GO:0002831 regulation of response to biotic stimulus; GO:0006355 regulation of transcription, DNA-templated; GO:0006950 response to stress; GO:00…	GO:0005622 intracellular; GO:0005623 cell; GO:0005634 nucleus; GO:0005737 cytoplasm; GO:0005886 plasma membrane; GO:0016020 membrane; GO:0043226 organelle; GO:0043227 membrane-bounded organelle; GO:0043229 intracellular organelle; GO:0043231 intracellular membrane-bounded organelle; GO:0044424 intracellular part; GO:0044464 cell part; GO:0071944 cell periphery;	GO:0001067 regulatory region nucleic acid binding; GO:0003676 nucleic acid binding; GO:0003677 DNA binding; GO:0003700 transcription factor activity, sequence-specific DNA binding; GO:0003712 transcription cofactor activity; GO:0003713 transcription coactivator activity; GO:0005488 binding; GO:0005515 protein binding; GO:0043621 protein self-association; GO:0044212 transcription regulatory region…
Q9LKR3	AT5G28540	Heat shock 70 kDa protein BIP1 OS=Arabidopsis thaliana OX=3702 GN=BIP1 PE=1 SV=1	BIP1	1.784	2.19437e-05	Up	73.6	47	28	99	2	0.747	0.706	0.702	1.276	1.319	1.249	endoplasmic reticulum	K09490	HSPA5, BIP; heat shock 70kDa protein 5	map03060 Protein export; map04141 Protein processing in endoplasmic reticulum	GO:0006508 proteolysis; GO:0006511 ubiquitin-dependent protein catabolic process; GO:0006807 nitrogen compound metabolic process; GO:0006950 response to stress; GO:0008152 metabolic process; GO:0009056 catabolic process; GO:0009057 macromolecule catabolic process; GO:0009719 response to endogenous stimulus; GO:0009725 response to hormone; GO:0009735 response to cytokinin; GO:0009987 cellular proc…	GO:0005618 cell wall; GO:0005622 intracellular; GO:0005623 cell; GO:0005634 nucleus; GO:0005654 nucleoplasm; GO:0005730 nucleolus; GO:0005737 cytoplasm; GO:0005773 vacuole; GO:0005774 vacuolar membrane; GO:0005783 endoplasmic reticulum; GO:0005788 endoplasmic reticulum lumen; GO:0005794 Golgi apparatus; GO:0005829 cytosol; GO:0005886 plasma membrane; GO:0005911 cell-cell junction; GO:0009506 plas…				O	KOG0100	Molecular chaperones GRP78/BiP/KAR2, HSP70 superfamily
Q9LP11	AT1G43910	AAA-ATPase At1g43910 OS=Arabidopsis thaliana OX=3702 GN=At1g43910 PE=1 SV=1	At1g43910	1.335	0.000529092	Up	54.2	9	4	5	3	0.824	0.819	0.878	1.151	1.13	1.084	chloroplast	K08900	BCS1; mitochondrial chaperone BCS1		GO:0001101 response to acid chemical; GO:0006950 response to stress; GO:0007154 cell communication; GO:0009267 cellular response to starvation; GO:0009605 response to external stimulus; GO:0009719 response to endogenous stimulus; GO:0009725 response to hormone; GO:0009737 response to abscisic acid; GO:0009987 cellular process; GO:0009991 response to extracellular stimulus; GO:0010033 response to …	GO:0005622 intracellular; GO:0005623 cell; GO:0005737 cytoplasm; GO:0005783 endoplasmic reticulum; GO:0005794 Golgi apparatus; GO:0005911 cell-cell junction; GO:0009506 plasmodesma; GO:0012505 endomembrane system; GO:0030054 cell junction; GO:0043226 organelle; GO:0043227 membrane-bounded organelle; GO:0043229 intracellular organelle; GO:0043231 intracellular membrane-bounded organelle; GO:004442…		PF00004	ATPase family associated with various cellular activities (AAA)	O	KOG0743	AAA+-type ATPase
Q9LYW9	AT5G03160	DnaJ protein P58IPK homolog OS=Arabidopsis thaliana OX=3702 GN=P58IPK PE=1 SV=1	P58IPK	1.518	4.62652e-05	Up	53.7	18	8	17	8	0.808	0.77	0.79	1.187	1.238	1.169	endoplasmic reticulum	K09523	DNAJC3; DnaJ homolog subfamily C member 3	map04141 Protein processing in endoplasmic reticulum	GO:0035821 modification of morphology or physiology of other organism; GO:0043900 regulation of multi-organism process; GO:0043902 positive regulation of multi-organism process; GO:0043903 regulation of symbiosis, encompassing mutualism through parasitism; GO:0044403 symbiosis, encompassing mutualism through parasitism; GO:0044419 interspecies interaction between organisms; GO:0044788 modulation …	GO:0005622 intracellular; GO:0005623 cell; GO:0005737 cytoplasm; GO:0005783 endoplasmic reticulum; GO:0005788 endoplasmic reticulum lumen; GO:0005886 plasma membrane; GO:0012505 endomembrane system; GO:0016020 membrane; GO:0031974 membrane-enclosed lumen; GO:0043226 organelle; GO:0043227 membrane-bounded organelle; GO:0043229 intracellular organelle; GO:0043231 intracellular membrane-bounded orga…		PF00226	DnaJ domain	O	KOG0550	Molecular chaperone (DnaJ superfamily)
Q9LZF8	AT5G03320	Serine/threonine-protein kinase PCRK2 OS=Arabidopsis thaliana OX=3702 GN=PCRK2 PE=1 SV=1	PCRK2	1.325	0.00887373	Up	47	3	1	1	1	0.768	0.876	0.937	1.166	1.135	1.118	nucleus	K04733	IRAK4; interleukin-1 receptor-associated kinase 4 [EC:2.7.11.1]		GO:0002218 activation of innate immune response; GO:0002221 pattern recognition receptor signaling pathway; GO:0002253 activation of immune response; GO:0002376 immune system process; GO:0002682 regulation of immune system process; GO:0002684 positive regulation of immune system process; GO:0002757 immune response-activating signal transduction; GO:0002758 innate immune response-activating signal…	GO:0005623 cell; GO:0005886 plasma membrane; GO:0016020 membrane; GO:0044464 cell part; GO:0071944 cell periphery;	GO:0003824 catalytic activity; GO:0004672 protein kinase activity; GO:0004674 protein serine/threonine kinase activity; GO:0004675 transmembrane receptor protein serine/threonine kinase activity; GO:0004888 transmembrane signaling receptor activity; GO:0016301 kinase activity; GO:0016740 transferase activity; GO:0016772 transferase activity, transferring phosphorus-containing groups; GO:0016773 p…	PF07714	Protein tyrosine kinase	T	KOG1187	Serine/threonine protein kinase
Q9LZK5	AT3G62600	DnaJ protein ERDJ3B OS=Arabidopsis thaliana OX=3702 GN=ERDJ3B PE=1 SV=1	ERDJ3B	1.558	7.88393e-06	Up	39.2	10	6	14	6	0.764	0.795	0.783	1.22	1.195	1.235	cytoplasm	K09517	DNAJB11; DnaJ homolog subfamily B member 11	map04141 Protein processing in endoplasmic reticulum	GO:0002682 regulation of immune system process; GO:0002684 positive regulation of immune system process; GO:0009605 response to external stimulus; GO:0009607 response to biotic stimulus; GO:0031347 regulation of defense response; GO:0031349 positive regulation of defense response; GO:0035821 modification of morphology or physiology of other organism; GO:0043207 response to external biotic stimulu…	GO:0005622 intracellular; GO:0005623 cell; GO:0005737 cytoplasm; GO:0005783 endoplasmic reticulum; GO:0005788 endoplasmic reticulum lumen; GO:0005886 plasma membrane; GO:0012505 endomembrane system; GO:0016020 membrane; GO:0031974 membrane-enclosed lumen; GO:0032991 macromolecular complex; GO:0034663 endoplasmic reticulum chaperone complex; GO:0043226 organelle; GO:0043227 membrane-bounded organe…		PF00226; PF01556	DnaJ domain; DnaJ C terminal domain	O	KOG0713	Molecular chaperone (DnaJ superfamily)
Q9MAU6	AT1G04980	Protein disulfide-isomerase like 2-2 OS=Arabidopsis thaliana OX=3702 GN=PDIL2-2 PE=2 SV=2	PDIL2-2	1.5	5.78272e-05	Up	48.4	14	5	10	5	0.8	0.782	0.824	1.165	1.211	1.234	chloroplast	K09584	PDIA6, TXNDC7; protein disulfide-isomerase A6 [EC:5.3.4.1]	map04141 Protein processing in endoplasmic reticulum	GO:0006457 protein folding; GO:0006950 response to stress; GO:0009987 cellular process; GO:0033554 cellular response to stress; GO:0034976 response to endoplasmic reticulum stress; GO:0050896 response to stimulus; GO:0051716 cellular response to stimulus;	GO:0005618 cell wall; GO:0005622 intracellular; GO:0005623 cell; GO:0005737 cytoplasm; GO:0005773 vacuole; GO:0005783 endoplasmic reticulum; GO:0005788 endoplasmic reticulum lumen; GO:0005794 Golgi apparatus; GO:0005886 plasma membrane; GO:0009505 plant-type cell wall; GO:0012505 endomembrane system; GO:0016020 membrane; GO:0030312 external encapsulating structure; GO:0031974 membrane-enclosed lu…	GO:0003756 protein disulfide isomerase activity; GO:0003824 catalytic activity; GO:0016853 isomerase activity; GO:0016860 intramolecular oxidoreductase activity; GO:0016864 intramolecular oxidoreductase activity, transposing S-S bonds;	PF00085	Thioredoxin	O	KOG0191	Thioredoxin/protein disulfide isomerase
Q9SD45	AT3G51000	AT3g51000/F24M12_40 OS=Arabidopsis thaliana OX=3702 GN=F24M12.40 PE=2 SV=1	F24M12.40	1.371	0.0248707	Up	36.7	15	3	4	3	0.737	0.867	0.938	1.248	1.2	1.037	cytoplasm							PF00561	alpha/beta hydrolase fold	I	KOG4178	Soluble epoxide hydrolase
Q9SHY3	AT1G65720	At1g65720/F1E22_13 OS=Arabidopsis thaliana OX=3702 GN=At1g65720 PE=2 SV=1	At1g65720	1.345	0.00301859	Up	20.1	7	1	1	1	0.826	0.83	0.903	1.098	1.23	1.113	chloroplast
Q9SR96	AT3G08970	DnaJ protein ERDJ3A OS=Arabidopsis thaliana OX=3702 GN=ERDJ3A PE=1 SV=1	ERDJ3A	2.922	1.21128e-05	Up	62.5	16	7	13	7	0.526	0.48	0.535	1.524	1.544	1.435	nucleus				GO:0000003 reproduction; GO:0000902 cell morphogenesis; GO:0000904 cell morphogenesis involved in differentiation; GO:0003006 developmental process involved in reproduction; GO:0006950 response to stress; GO:0008152 metabolic process; GO:0009266 response to temperature stimulus; GO:0009408 response to heat; GO:0009628 response to abiotic stimulus; GO:0009653 anatomical structure morphogenesis; GO…	GO:0005622 intracellular; GO:0005623 cell; GO:0005737 cytoplasm; GO:0005773 vacuole; GO:0005783 endoplasmic reticulum; GO:0005788 endoplasmic reticulum lumen; GO:0005911 cell-cell junction; GO:0009506 plasmodesma; GO:0012505 endomembrane system; GO:0030054 cell junction; GO:0031974 membrane-enclosed lumen; GO:0043226 organelle; GO:0043227 membrane-bounded organelle; GO:0043229 intracellular organ…	GO:0003824 catalytic activity; GO:0016491 oxidoreductase activity;	PF00226	DnaJ domain	O	KOG0714	Molecular chaperone (DnaJ superfamily)
Q9SRG3	AT1G77510	Protein disulfide isomerase-like 1-2 OS=Arabidopsis thaliana OX=3702 GN=PDIL1-2 PE=2 SV=1	PDIL1-2	2.208	3.92527e-06	Up	56.3	58	24	68	19	0.596	0.642	0.617	1.361	1.383	1.351	endoplasmic reticulum	K09580	PDIA1, P4HB; protein disulfide-isomerase A1 [EC:5.3.4.1]	map04141 Protein processing in endoplasmic reticulum	GO:0000003 reproduction; GO:0003006 developmental process involved in reproduction; GO:0006457 protein folding; GO:0006950 response to stress; GO:0006970 response to osmotic stress; GO:0007275 multicellular organism development; GO:0009314 response to radiation; GO:0009416 response to light stimulus; GO:0009628 response to abiotic stimulus; GO:0009642 response to light intensity; GO:0009644 respo…	GO:0000322 storage vacuole; GO:0000323 lytic vacuole; GO:0000325 plant-type vacuole; GO:0000326 protein storage vacuole; GO:0000327 lytic vacuole within protein storage vacuole; GO:0005618 cell wall; GO:0005622 intracellular; GO:0005623 cell; GO:0005737 cytoplasm; GO:0005773 vacuole; GO:0005774 vacuolar membrane; GO:0005783 endoplasmic reticulum; GO:0005788 endoplasmic reticulum lumen; GO:0005794…	GO:0003756 protein disulfide isomerase activity; GO:0003824 catalytic activity; GO:0016853 isomerase activity; GO:0016860 intramolecular oxidoreductase activity; GO:0016864 intramolecular oxidoreductase activity, transposing S-S bonds;	PF00085; PF13848	Thioredoxin; Thioredoxin-like domain	O	KOG0190	Protein disulfide isomerase (prolyl 4-hydroxylase beta subunit)
Q9STX5	AT4G24190	Endoplasmin homolog OS=Arabidopsis thaliana OX=3702 GN=HSP90-7 PE=1 SV=1	HSP90-7	1.415	0.0202147	Up	94.1	19	13	28	12	0.915	0.763	0.815	1.315	1.196	1.016	endoplasmic reticulum	K09487	HSP90B, TRA1; heat shock protein 90kDa beta	map04141 Protein processing in endoplasmic reticulum; map04626 Plant-pathogen interaction	GO:0001101 response to acid chemical; GO:0002790 peptide secretion; GO:0006810 transport; GO:0006950 response to stress; GO:0006970 response to osmotic stress; GO:0008104 protein localization; GO:0009266 response to temperature stimulus; GO:0009306 protein secretion; GO:0009409 response to cold; GO:0009414 response to water deprivation; GO:0009415 response to water; GO:0009628 response to abiotic…	GO:0005576 extracellular region; GO:0005622 intracellular; GO:0005623 cell; GO:0005634 nucleus; GO:0005737 cytoplasm; GO:0005739 mitochondrion; GO:0005773 vacuole; GO:0005774 vacuolar membrane; GO:0005783 endoplasmic reticulum; GO:0005788 endoplasmic reticulum lumen; GO:0005886 plasma membrane; GO:0005911 cell-cell junction; GO:0009506 plasmodesma; GO:0009507 chloroplast; GO:0009536 plastid; GO:0…	GO:0003824 catalytic activity; GO:0016462 pyrophosphatase activity; GO:0016787 hydrolase activity; GO:0016817 hydrolase activity, acting on acid anhydrides; GO:0016818 hydrolase activity, acting on acid anhydrides, in phosphorus-containing anhydrides; GO:0016887 ATPase activity; GO:0017111 nucleoside-triphosphatase activity;	PF02518	Histidine kinase-, DNA gyrase B-, and HSP90-like ATPase	O	KOG0020	Endoplasmic reticulum glucose-regulated protein (GRP94/endoplasmin), HSP90 family
Q9SU93	AT4G29520	Nucleophosmin OS=Arabidopsis thaliana OX=3702 GN=At4g29520 PE=4 SV=1	At4g29520	1.881	1.35485e-06	Up	34.3	34	10	20	10	0.699	0.688	0.687	1.269	1.308	1.324	vacuolar membrane
Q9SV06	AT3G51980	ARM repeat superfamily protein OS=Arabidopsis thaliana OX=3702 GN=F4F15.90 PE=2 SV=1	F4F15.90	2.32	0.000116015	Up	42.5	20	5	7	5	0.598	0.645	0.55	1.342	1.478	1.34	plasma membrane	K09562	HSPBP1, FES1; hsp70-interacting protein	map04141 Protein processing in endoplasmic reticulum						O	KOG2160	Armadillo/beta-catenin-like repeat-containing protein
Q9SZR6	AT4G29960	Transmembrane protein OS=Arabidopsis thaliana OX=3702 GN=At4g29960 PE=2 SV=1	At4g29960	1.386	0.00110639	Up	31.9	7	1	1	1	0.793	0.895	0.827	1.153	1.134	1.198	plasma membrane
Q9XI01	AT1G21750	Protein disulfide isomerase-like 1-1 OS=Arabidopsis thaliana OX=3702 GN=PDIL1-1 PE=1 SV=1	PDIL1-1	1.61	9.12265e-07	Up	55.6	51	20	65	16	0.76	0.782	0.765	1.237	1.247	1.231	chloroplast	K09580	PDIA1, P4HB; protein disulfide-isomerase A1 [EC:5.3.4.1]	map04141 Protein processing in endoplasmic reticulum	GO:0000003 reproduction; GO:0003006 developmental process involved in reproduction; GO:0006457 protein folding; GO:0006950 response to stress; GO:0006970 response to osmotic stress; GO:0007275 multicellular organism development; GO:0009314 response to radiation; GO:0009416 response to light stimulus; GO:0009628 response to abiotic stimulus; GO:0009642 response to light intensity; GO:0009644 respo…	GO:0000322 storage vacuole; GO:0000323 lytic vacuole; GO:0000325 plant-type vacuole; GO:0000326 protein storage vacuole; GO:0000327 lytic vacuole within protein storage vacuole; GO:0005618 cell wall; GO:0005622 intracellular; GO:0005623 cell; GO:0005737 cytoplasm; GO:0005773 vacuole; GO:0005774 vacuolar membrane; GO:0005783 endoplasmic reticulum; GO:0005788 endoplasmic reticulum lumen; GO:0005794…	GO:0003756 protein disulfide isomerase activity; GO:0003824 catalytic activity; GO:0016853 isomerase activity; GO:0016860 intramolecular oxidoreductase activity; GO:0016864 intramolecular oxidoreductase activity, transposing S-S bonds;	PF00085; PF13848	Thioredoxin; Thioredoxin-like domain	O	KOG0190	Protein disulfide isomerase (prolyl 4-hydroxylase beta subunit)
A8MSF9	AT4G28250	Expansin B3 OS=Arabidopsis thaliana OX=3702 GN=EXPB3 PE=3 SV=1	EXPB3	0.758	0.000155694	Down	27.7	8	2	2	2	1.135	1.123	1.155	0.84	0.855	0.893	chloroplast	K20628	exlX; expansin		GO:0006949 syncytium formation; GO:0009653 anatomical structure morphogenesis; GO:0009987 cellular process; GO:0032502 developmental process; GO:0048646 anatomical structure formation involved in morphogenesis; GO:0048856 anatomical structure development;	GO:0005618 cell wall; GO:0005623 cell; GO:0005911 cell-cell junction; GO:0009506 plasmodesma; GO:0016020 membrane; GO:0030054 cell junction; GO:0030312 external encapsulating structure; GO:0044464 cell part; GO:0055044 symplast; GO:0071944 cell periphery;		PF03330; PF01357	Rare lipoprotein A (RlpA)-like double-psi beta-barrel; Pollen allergen
B3H5J6	AT5G24780	Vegetative storage protein 1 OS=Arabidopsis thaliana OX=3702 GN=VSP1 PE=4 SV=1	VSP1	0.645	0.000275378	Down	25.2	3	1	2	1	1.225	1.174	1.249	0.743	0.781	0.829	chloroplast	K20728	VSP2; vegetative storage protein 2	map04016 MAPK signaling pathway - plant	GO:0001101 response to acid chemical; GO:0002213 defense response to insect; GO:0006793 phosphorus metabolic process; GO:0006796 phosphate-containing compound metabolic process; GO:0006950 response to stress; GO:0006952 defense response; GO:0006979 response to oxidative stress; GO:0008152 metabolic process; GO:0009605 response to external stimulus; GO:0009607 response to biotic stimulus; GO:00096…	GO:0005622 intracellular; GO:0005623 cell; GO:0005737 cytoplasm; GO:0005773 vacuole; GO:0005829 cytosol; GO:0005840 ribosome; GO:0022626 cytosolic ribosome; GO:0032991 macromolecular complex; GO:0043226 organelle; GO:0043227 membrane-bounded organelle; GO:0043228 non-membrane-bounded organelle; GO:0043229 intracellular organelle; GO:0043231 intracellular membrane-bounded organelle; GO:0043232 int…	GO:0003824 catalytic activity; GO:0003993 acid phosphatase activity; GO:0005488 binding; GO:0005515 protein binding; GO:0008134 transcription factor binding; GO:0016787 hydrolase activity; GO:0016788 hydrolase activity, acting on ester bonds; GO:0016791 phosphatase activity; GO:0042578 phosphoric ester hydrolase activity;
O49603	AT5G64620	Cell wall / vacuolar inhibitor of fructosidase 2 OS=Arabidopsis thaliana OX=3702 GN=C/VIF2 PE=1 SV=1	C/VIF2	0.684	0.000667658	Down	19.6	11	2	3	2	1.098	1.231	1.235	0.8	0.813	0.824	extracellular				GO:0009628 response to abiotic stimulus; GO:0043086 negative regulation of catalytic activity; GO:0044092 negative regulation of molecular function; GO:0050790 regulation of catalytic activity; GO:0050896 response to stimulus; GO:0065007 biological regulation; GO:0065009 regulation of molecular function; GO:0080167 response to karrikin;		GO:0004857 enzyme inhibitor activity; GO:0030234 enzyme regulator activity; GO:0046910 pectinesterase inhibitor activity; GO:0098772 molecular function regulator;	PF04043	Plant invertase/pectin methylesterase inhibitor
O64481	AT2G19170	Subtilisin-like protease SBT2.5 OS=Arabidopsis thaliana OX=3702 GN=SBT2.5 PE=2 SV=1	SBT2.5	0.723	0.005338	Down	87.6	3	2	2	2	1.171	1.091	1.22	0.763	0.903	0.852	endoplasmic reticulum				GO:0006508 proteolysis; GO:0006807 nitrogen compound metabolic process; GO:0008152 metabolic process; GO:0019538 protein metabolic process; GO:0043170 macromolecule metabolic process; GO:0044238 primary metabolic process; GO:0071704 organic substance metabolic process; GO:1901564 organonitrogen compound metabolic process;		GO:0003824 catalytic activity; GO:0004175 endopeptidase activity; GO:0004252 serine-type endopeptidase activity; GO:0008233 peptidase activity; GO:0008236 serine-type peptidase activity; GO:0016787 hydrolase activity; GO:0017171 serine hydrolase activity; GO:0070011 peptidase activity, acting on L-amino acid peptides;	PF05922; PF00082	Peptidase inhibitor I9; Subtilase family
P0DI10	AT1G05240	Peroxidase 1 OS=Arabidopsis thaliana OX=3702 GN=PER1 PE=1 SV=1	PER1	0.704	0.013151	Down	35.6	22	5	9	5	1.053	1.207	1.231	0.717	0.896	0.846	extracellular	K00430	E1.11.1.7; peroxidase [EC:1.11.1.7]	map00940 Phenylpropanoid biosynthesis; map01100 Metabolic pathways; map01110 Biosynthesis of secondary metabolites	GO:0006725 cellular aromatic compound metabolic process; GO:0008152 metabolic process; GO:0009636 response to toxic substance; GO:0009664 plant-type cell wall organization; GO:0009698 phenylpropanoid metabolic process; GO:0009808 lignin metabolic process; GO:0009987 cellular process; GO:0016043 cellular component organization; GO:0019748 secondary metabolic process; GO:0042221 response to chemica…	GO:0005618 cell wall; GO:0005623 cell; GO:0005911 cell-cell junction; GO:0009505 plant-type cell wall; GO:0009506 plasmodesma; GO:0030054 cell junction; GO:0030312 external encapsulating structure; GO:0044464 cell part; GO:0055044 symplast; GO:0071944 cell periphery;	GO:0003824 catalytic activity; GO:0004601 peroxidase activity; GO:0016209 antioxidant activity; GO:0016491 oxidoreductase activity; GO:0016684 oxidoreductase activity, acting on peroxide as acceptor;	PF00141	Peroxidase
P13114	AT5G13930	Chalcone synthase OS=Arabidopsis thaliana OX=3702 GN=CHS PE=1 SV=1	CHS	0.768	0.022049	Down	43.1	15	4	6	4	1.026	1.076	1.274	0.821	0.864	0.907	cytoplasm	K00660	CHS; chalcone synthase [EC:2.3.1.74]	map00941 Flavonoid biosynthesis; map01100 Metabolic pathways; map01110 Biosynthesis of secondary metabolites; map04712 Circadian rhythm - plant	GO:0001101 response to acid chemical; GO:0006810 transport; GO:0006950 response to stress; GO:0006979 response to oxidative stress; GO:0008152 metabolic process; GO:0009058 biosynthetic process; GO:0009314 response to radiation; GO:0009411 response to UV; GO:0009416 response to light stimulus; GO:0009611 response to wounding; GO:0009628 response to abiotic stimulus; GO:0009629 response to gravity…	GO:0000325 plant-type vacuole; GO:0005622 intracellular; GO:0005623 cell; GO:0005634 nucleus; GO:0005737 cytoplasm; GO:0005773 vacuole; GO:0005774 vacuolar membrane; GO:0005783 endoplasmic reticulum; GO:0009705 plant-type vacuole membrane; GO:0012505 endomembrane system; GO:0016020 membrane; GO:0031090 organelle membrane; GO:0043226 organelle; GO:0043227 membrane-bounded organelle; GO:0043229 int…		PF00195; PF02797	Chalcone and stilbene synthases, N-terminal domain; Chalcone and stilbene synthases, C-terminal domain
P50700	AT4G11650	Osmotin-like protein OSM34 OS=Arabidopsis thaliana OX=3702 GN=OSM34 PE=2 SV=2	OSM34	0.76	0.00728232	Down	26.6	7	2	2	2	1.035	1.237	1.137	0.836	0.877	0.878	chloroplast				GO:0002376 immune system process; GO:0006950 response to stress; GO:0006952 defense response; GO:0006955 immune response; GO:0006970 response to osmotic stress; GO:0009605 response to external stimulus; GO:0009607 response to biotic stimulus; GO:0009617 response to bacterium; GO:0009620 response to fungus; GO:0009628 response to abiotic stimulus; GO:0009651 response to salt stress; GO:0009814 def…	GO:0005622 intracellular; GO:0005623 cell; GO:0005737 cytoplasm; GO:0044424 intracellular part; GO:0044464 cell part;		PF00314	Thaumatin family
Q08298	AT5G25610	BURP domain protein RD22 OS=Arabidopsis thaliana OX=3702 GN=RD22 PE=2 SV=1	RD22	0.731	0.0038945	Down	42.2	3	1	1	1	1.072	1.267	1.127	0.871	0.831	0.83	extracellular				GO:0006950 response to stress; GO:0006970 response to osmotic stress; GO:0009628 response to abiotic stimulus; GO:0009651 response to salt stress; GO:0050896 response to stimulus;	GO:0005622 intracellular; GO:0005623 cell; GO:0005737 cytoplasm; GO:0005768 endosome; GO:0005794 Golgi apparatus; GO:0005802 trans-Golgi network; GO:0012505 endomembrane system; GO:0031410 cytoplasmic vesicle; GO:0031982 vesicle; GO:0031984 organelle subcompartment; GO:0043226 organelle; GO:0043227 membrane-bounded organelle; GO:0043229 intracellular organelle; GO:0043231 intracellular membrane-b…
Q7X659	AT2G17790	Vacuolar protein sorting-associated protein 35A OS=Arabidopsis thaliana OX=3702 GN=VPS35A PE=1 SV=1	VPS35A	0.746	0.00979032	Down	89.4	5	3	3	2	1.27	1.137	1.029	0.839	0.846	0.879	cytoplasm	K18468	VPS35; vacuolar protein sorting-associated protein 35	map04144 Endocytosis	GO:0006810 transport; GO:0006886 intracellular protein transport; GO:0008104 protein localization; GO:0015031 protein transport; GO:0015833 peptide transport; GO:0016192 vesicle-mediated transport; GO:0016197 endosomal transport; GO:0016482 cytosolic transport; GO:0033036 macromolecule localization; GO:0034613 cellular protein localization; GO:0042147 retrograde transport, endosome to Golgi; GO:0…	GO:0005622 intracellular; GO:0005623 cell; GO:0005737 cytoplasm; GO:0005768 endosome; GO:0005770 late endosome; GO:0005771 multivesicular body; GO:0010008 endosome membrane; GO:0012505 endomembrane system; GO:0016020 membrane; GO:0030904 retromer complex; GO:0031090 organelle membrane; GO:0031410 cytoplasmic vesicle; GO:0031982 vesicle; GO:0032991 macromolecular complex; GO:0043226 organelle; GO:…	GO:0005215 transporter activity; GO:0008565 protein transporter activity;			U	KOG1107	Membrane coat complex Retromer, subunit VPS35
Q8LF80	AT1G76540	Cyclin-dependent kinase B2-1 OS=Arabidopsis thaliana OX=3702 GN=CDKB2-1 PE=1 SV=2	CDKB2-1	0.722	0.00106807	Down	35.6	5	1	3	1	1.106	1.178	1.201	0.879	0.842	0.794	cytoplasm	K07760	CDK; cyclin-dependent kinase [EC:2.7.11.22]		GO:0000082 G1/S transition of mitotic cell cycle; GO:0000086 G2/M transition of mitotic cell cycle; GO:0000278 mitotic cell cycle; GO:0006325 chromatin organization; GO:0006464 cellular protein modification process; GO:0006468 protein phosphorylation; GO:0006793 phosphorus metabolic process; GO:0006796 phosphate-containing compound metabolic process; GO:0006807 nitrogen compound metabolic process…	GO:0000307 cyclin-dependent protein kinase holoenzyme complex; GO:0005622 intracellular; GO:0005623 cell; GO:0005634 nucleus; GO:0005737 cytoplasm; GO:0032991 macromolecular complex; GO:0043226 organelle; GO:0043227 membrane-bounded organelle; GO:0043229 intracellular organelle; GO:0043231 intracellular membrane-bounded organelle; GO:0044424 intracellular part; GO:0044464 cell part; GO:0061695 tr…	GO:0003824 catalytic activity; GO:0004672 protein kinase activity; GO:0004674 protein serine/threonine kinase activity; GO:0004693 cyclin-dependent protein serine/threonine kinase activity; GO:0005488 binding; GO:0005515 protein binding; GO:0016301 kinase activity; GO:0016740 transferase activity; GO:0016772 transferase activity, transferring phosphorus-containing groups; GO:0016773 phosphotransf…	PF00069	Protein kinase domain	T	KOG0594	Protein kinase PCTAIRE and related kinases
Q8RWZ1	AT1G11130	Protein STRUBBELIG OS=Arabidopsis thaliana OX=3702 GN=SUB PE=1 SV=1	SUB	0.751	0.0233458	Down	84.4	2	1	1	1	1.187	1.051	1.189	0.979	0.777	0.816	chloroplast				GO:0000003 reproduction; GO:0000902 cell morphogenesis; GO:0003002 regionalization; GO:0003006 developmental process involved in reproduction; GO:0006464 cellular protein modification process; GO:0006468 protein phosphorylation; GO:0006793 phosphorus metabolic process; GO:0006796 phosphate-containing compound metabolic process; GO:0006807 nitrogen compound metabolic process; GO:0007154 cell commu…	GO:0005623 cell; GO:0005886 plasma membrane; GO:0005911 cell-cell junction; GO:0009506 plasmodesma; GO:0016020 membrane; GO:0030054 cell junction; GO:0044464 cell part; GO:0055044 symplast; GO:0071944 cell periphery;	GO:0003824 catalytic activity; GO:0004672 protein kinase activity; GO:0004674 protein serine/threonine kinase activity; GO:0004675 transmembrane receptor protein serine/threonine kinase activity; GO:0004888 transmembrane signaling receptor activity; GO:0016301 kinase activity; GO:0016740 transferase activity; GO:0016772 transferase activity, transferring phosphorus-containing groups; GO:0016773 p…	PF00069	Protein kinase domain	T	KOG1187	Serine/threonine protein kinase
Q94A02	AT4G24670	Tryptophan aminotransferase-related protein 2 OS=Arabidopsis thaliana OX=3702 GN=TAR2 PE=2 SV=1	TAR2	0.627	0.00343594	Down	50	10	3	3	3	1.118	1.383	1.186	0.81	0.791	0.712	vacuolar membrane	K16903	TAA1; L-tryptophan---pyruvate aminotransferase [EC:2.6.1.99]	map00380 Tryptophan metabolism; map01100 Metabolic pathways	GO:0000003 reproduction; GO:0003006 developmental process involved in reproduction; GO:0006950 response to stress; GO:0006952 defense response; GO:0007154 cell communication; GO:0007275 multicellular organism development; GO:0009605 response to external stimulus; GO:0009606 tropism; GO:0009607 response to biotic stimulus; GO:0009617 response to bacterium; GO:0009628 response to abiotic stimulus; …	GO:0005622 intracellular; GO:0005623 cell; GO:0005737 cytoplasm; GO:0005783 endoplasmic reticulum; GO:0005789 endoplasmic reticulum membrane; GO:0012505 endomembrane system; GO:0016020 membrane; GO:0031984 organelle subcompartment; GO:0042175 nuclear outer membrane-endoplasmic reticulum membrane network; GO:0043226 organelle; GO:0043227 membrane-bounded organelle; GO:0043229 intracellular organel…	GO:0003824 catalytic activity; GO:0008483 transaminase activity; GO:0016740 transferase activity; GO:0016769 transferase activity, transferring nitrogenous groups; GO:0050362 L-tryptophan:2-oxoglutarate aminotransferase activity; GO:0070529 L-tryptophan aminotransferase activity; GO:0080097 L-tryptophan:pyruvate aminotransferase activity;	PF04864	Allinase
Q94F40	AT1G28600	GDSL esterase/lipase At1g28600 OS=Arabidopsis thaliana OX=3702 GN=At1g28600 PE=2 SV=1	At1g28600	0.74	9.5832e-05	Down	43.6	5	2	3	2	1.159	1.173	1.116	0.841	0.871	0.84	cytoplasm					GO:0005618 cell wall; GO:0005622 intracellular; GO:0005623 cell; GO:0005737 cytoplasm; GO:0005773 vacuole; GO:0030312 external encapsulating structure; GO:0043226 organelle; GO:0043227 membrane-bounded organelle; GO:0043229 intracellular organelle; GO:0043231 intracellular membrane-bounded organelle; GO:0044424 intracellular part; GO:0044444 cytoplasmic part; GO:0044464 cell part; GO:0071944 cell…
Q9C525	AT1G66270	Beta-glucosidase 21 OS=Arabidopsis thaliana OX=3702 GN=BGLU21 PE=1 SV=1	BGLU21	0.757	0.0014974	Down	59.6	21	8	31	4	1.097	1.166	1.13	0.804	0.879	0.887	vacuolar membrane	K01188	E3.2.1.21; beta-glucosidase [EC:3.2.1.21]	map00460 Cyanoamino acid metabolism; map00500 Starch and sucrose metabolism; map00940 Phenylpropanoid biosynthesis; map01100 Metabolic pathways; map01110 Biosynthesis of secondary metabolites	GO:0001101 response to acid chemical; GO:0002376 immune system process; GO:0006066 alcohol metabolic process; GO:0006082 organic acid metabolic process; GO:0006629 lipid metabolic process; GO:0006714 sesquiterpenoid metabolic process; GO:0006720 isoprenoid metabolic process; GO:0006721 terpenoid metabolic process; GO:0006725 cellular aromatic compound metabolic process; GO:0006790 sulfur compound…	GO:0005622 intracellular; GO:0005623 cell; GO:0005634 nucleus; GO:0005737 cytoplasm; GO:0005773 vacuole; GO:0005777 peroxisome; GO:0005783 endoplasmic reticulum; GO:0005788 endoplasmic reticulum lumen; GO:0005911 cell-cell junction; GO:0009506 plasmodesma; GO:0009507 chloroplast; GO:0009526 plastid envelope; GO:0009536 plastid; GO:0009941 chloroplast envelope; GO:0010168 ER body; GO:0012505 endom…	GO:0002020 protease binding; GO:0003824 catalytic activity; GO:0004553 hydrolase activity, hydrolyzing O-glycosyl compounds; GO:0005488 binding; GO:0005507 copper ion binding; GO:0005515 protein binding; GO:0008422 beta-glucosidase activity; GO:0015926 glucosidase activity; GO:0015928 fucosidase activity; GO:0016787 hydrolase activity; GO:0016798 hydrolase activity, acting on glycosyl bonds; GO:0…	PF00232	Glycosyl hydrolase family 1	G	KOG0626	Beta-glucosidase, lactase phlorizinhydrolase, and related proteins
Q9C8Y9	AT1G66280	Beta-glucosidase 22 OS=Arabidopsis thaliana OX=3702 GN=BGLU22 PE=1 SV=1	BGLU22	0.731	3.52765e-06	Down	59.7	14	6	23	3	1.181	1.158	1.155	0.844	0.852	0.859	vacuolar membrane	K01188	E3.2.1.21; beta-glucosidase [EC:3.2.1.21]	map00460 Cyanoamino acid metabolism; map00500 Starch and sucrose metabolism; map00940 Phenylpropanoid biosynthesis; map01100 Metabolic pathways; map01110 Biosynthesis of secondary metabolites	GO:0001101 response to acid chemical; GO:0002376 immune system process; GO:0006066 alcohol metabolic process; GO:0006082 organic acid metabolic process; GO:0006629 lipid metabolic process; GO:0006714 sesquiterpenoid metabolic process; GO:0006720 isoprenoid metabolic process; GO:0006721 terpenoid metabolic process; GO:0006725 cellular aromatic compound metabolic process; GO:0006790 sulfur compound…	GO:0005622 intracellular; GO:0005623 cell; GO:0005634 nucleus; GO:0005737 cytoplasm; GO:0005773 vacuole; GO:0005777 peroxisome; GO:0005783 endoplasmic reticulum; GO:0005788 endoplasmic reticulum lumen; GO:0005911 cell-cell junction; GO:0009506 plasmodesma; GO:0009507 chloroplast; GO:0009526 plastid envelope; GO:0009536 plastid; GO:0009941 chloroplast envelope; GO:0010168 ER body; GO:0012505 endom…	GO:0002020 protease binding; GO:0003824 catalytic activity; GO:0004553 hydrolase activity, hydrolyzing O-glycosyl compounds; GO:0005488 binding; GO:0005507 copper ion binding; GO:0005515 protein binding; GO:0008422 beta-glucosidase activity; GO:0015926 glucosidase activity; GO:0015928 fucosidase activity; GO:0016787 hydrolase activity; GO:0016798 hydrolase activity, acting on glycosyl bonds; GO:0…	PF00232	Glycosyl hydrolase family 1	G	KOG0626	Beta-glucosidase, lactase phlorizinhydrolase, and related proteins
Q9LFR3	AT5G14920	Gibberellin-regulated protein 14 OS=Arabidopsis thaliana OX=3702 GN=GASA14 PE=1 SV=1	GASA14	0.762	0.0314806	Down	29.1	3	1	1	1	1.088	1.215	1.102	0.741	0.964	0.889	extracellular
Q9LJU2	AT3G20560	Protein disulfide-isomerase 5-3 OS=Arabidopsis thaliana OX=3702 GN=PDIL5-3 PE=2 SV=1	PDIL5-3	0.743	0.0263071	Down	54	3	1	1	1	1.205	1.187	1.051	0.84	0.746	0.971	plasma membrane						GO:0003756 protein disulfide isomerase activity; GO:0003824 catalytic activity; GO:0016853 isomerase activity; GO:0016860 intramolecular oxidoreductase activity; GO:0016864 intramolecular oxidoreductase activity, transposing S-S bonds;	PF13850; PF00085	Endoplasmic Reticulum-Golgi Intermediate Compartment (ERGIC); Thioredoxin	U	KOG2667	COPII vesicle protein
Q9LM16	AT1G22200	Endoplasmic reticulum vesicle transporter protein OS=Arabidopsis thaliana OX=3702 GN=At1g22200 PE=2 SV=1	At1g22200	0.759	0.00203792	Down	43.8	6	3	4	3	1.083	1.196	1.188	0.84	0.891	0.9	plasma membrane	K20367	ERGIC3, ERV46; endoplasmic reticulum-Golgi intermediate compartment protein 3					PF13850	Endoplasmic Reticulum-Golgi Intermediate Compartment (ERGIC)	U	KOG2667	COPII vesicle protein
Q9LU14	AT3G16370	GDSL esterase/lipase APG OS=Arabidopsis thaliana OX=3702 GN=APG PE=2 SV=1	APG	0.722	0.000192309	Down	38.2	24	7	10	7	1.128	1.196	1.169	0.83	0.822	0.871	extracellular					GO:0005576 extracellular region; GO:0048046 apoplast;				L	KOG0017	FOG: Transposon-encoded proteins with TYA, reverse transcriptase, integrase domains in various combinations
Q9LYE4	AT5G11460	FCS-Like Zinc finger 10 OS=Arabidopsis thaliana OX=3702 GN=FLZ10 PE=1 SV=1	FLZ10	0.749	0.0020003	Down	37.8	2	1	1	1	1.064	1.179	1.189	0.888	0.845	0.836	chloroplast							PF04570	Protein of unknown function (DUF581)
Q9M266	AT3G61990	S-adenosyl-L-methionine-dependent methyltransferases superfamily protein OS=Arabidopsis thaliana OX=3702 GN=F21F14.160 PE=2 SV=1	F21F14.160	0.41	0.000243209	Down	32.1	9	1	2	1	1.318	1.549	1.387	0.546	0.646	0.554	extracellular							PF01596	O-methyltransferase	Q	KOG1663	O-methyltransferase
Q9M8Y5	AT3G04290	GDSL esterase/lipase LTL1 OS=Arabidopsis thaliana OX=3702 GN=LTL1 PE=2 SV=1	LTL1	0.706	0.000843469	Down	40.1	5	2	3	2	1.093	1.235	1.19	0.832	0.844	0.806	extracellular				GO:0001101 response to acid chemical; GO:0006950 response to stress; GO:0006970 response to osmotic stress; GO:0006972 hyperosmotic response; GO:0007275 multicellular organism development; GO:0009628 response to abiotic stimulus; GO:0009651 response to salt stress; GO:0009719 response to endogenous stimulus; GO:0009725 response to hormone; GO:0009751 response to salicylic acid; GO:0010033 respons…
Q9SB81	AT4G21960	Peroxidase 42 OS=Arabidopsis thaliana OX=3702 GN=PER42 PE=1 SV=2	PER42	0.722	0.000146675	Down	37.3	35	8	18	8	1.149	1.191	1.158	0.811	0.87	0.845	extracellular	K00430	E1.11.1.7; peroxidase [EC:1.11.1.7]	map00940 Phenylpropanoid biosynthesis; map01100 Metabolic pathways; map01110 Biosynthesis of secondary metabolites	GO:0008152 metabolic process; GO:0009636 response to toxic substance; GO:0009664 plant-type cell wall organization; GO:0009987 cellular process; GO:0016043 cellular component organization; GO:0042221 response to chemical; GO:0045229 external encapsulating structure organization; GO:0050896 response to stimulus; GO:0051716 cellular response to stimulus; GO:0055114 oxidation-reduction process; GO:0…	GO:0005618 cell wall; GO:0005623 cell; GO:0005911 cell-cell junction; GO:0009505 plant-type cell wall; GO:0009506 plasmodesma; GO:0030054 cell junction; GO:0030312 external encapsulating structure; GO:0044464 cell part; GO:0055044 symplast; GO:0071944 cell periphery;	GO:0003824 catalytic activity; GO:0004601 peroxidase activity; GO:0016209 antioxidant activity; GO:0016491 oxidoreductase activity; GO:0016684 oxidoreductase activity, acting on peroxide as acceptor;	PF00141	Peroxidase
Q9SCX8	AT3G17790	Purple acid phosphatase 17 OS=Arabidopsis thaliana OX=3702 GN=PAP17 PE=2 SV=1	PAP17	0.76	0.00327847	Down	38.3	3	1	1	1	1.098	1.135	1.176	0.844	0.816	0.93	vacuolar membrane	K14379	ACP5; tartrate-resistant acid phosphatase type 5 [EC:3.1.3.2]	map00740 Riboflavin metabolism; map01100 Metabolic pathways	GO:0000302 response to reactive oxygen species; GO:0006793 phosphorus metabolic process; GO:0006796 phosphate-containing compound metabolic process; GO:0006873 cellular ion homeostasis; GO:0006950 response to stress; GO:0006979 response to oxidative stress; GO:0008152 metabolic process; GO:0009636 response to toxic substance; GO:0009987 cellular process; GO:0010035 response to inorganic substance…	GO:0005622 intracellular; GO:0005623 cell; GO:0005737 cytoplasm; GO:0005773 vacuole; GO:0009986 cell surface; GO:0043226 organelle; GO:0043227 membrane-bounded organelle; GO:0043229 intracellular organelle; GO:0043231 intracellular membrane-bounded organelle; GO:0044424 intracellular part; GO:0044444 cytoplasmic part; GO:0044464 cell part;	GO:0003824 catalytic activity; GO:0003993 acid phosphatase activity; GO:0016787 hydrolase activity; GO:0016788 hydrolase activity, acting on ester bonds; GO:0016791 phosphatase activity; GO:0042578 phosphoric ester hydrolase activity;	PF00149	Calcineurin-like phosphoesterase	O	KOG2679	Purple (tartrate-resistant) acid phosphatase
Q9SID2	AT2G31360	Delta-9 acyl-lipid desaturase 2 OS=Arabidopsis thaliana OX=3702 GN=ADS2 PE=2 SV=2	ADS2	0.654	0.00407109	Down	36.4	4	1	1	1	1.068	1.337	1.223	0.818	0.747	0.807	cytoplasm	K23119	ADS2; very-long-chain acyl-lipid omega-9 desaturase [EC:1.14.19.75]		GO:0000038 very long-chain fatty acid metabolic process; GO:0006082 organic acid metabolic process; GO:0006629 lipid metabolic process; GO:0006631 fatty acid metabolic process; GO:0006633 fatty acid biosynthetic process; GO:0006636 unsaturated fatty acid biosynthetic process; GO:0008152 metabolic process; GO:0008610 lipid biosynthetic process; GO:0009058 biosynthetic process; GO:0009987 cellular …	GO:0005622 intracellular; GO:0005623 cell; GO:0005737 cytoplasm; GO:0005783 endoplasmic reticulum; GO:0005789 endoplasmic reticulum membrane; GO:0012505 endomembrane system; GO:0016020 membrane; GO:0031984 organelle subcompartment; GO:0042175 nuclear outer membrane-endoplasmic reticulum membrane network; GO:0043226 organelle; GO:0043227 membrane-bounded organelle; GO:0043229 intracellular organel…	GO:0003824 catalytic activity; GO:0016491 oxidoreductase activity;	PF00487	Fatty acid desaturase	I	KOG1600	Fatty acid desaturase
Q9SJB4	AT2G04570	GDSL esterase/lipase At2g04570 OS=Arabidopsis thaliana OX=3702 GN=At2g04570 PE=2 SV=1	At2g04570	0.744	0.00211051	Down	38.5	4	1	1	1	1.166	1.185	1.088	0.799	0.875	0.886	extracellular
Q9STZ8	AT4G12880	At4g12880 OS=Arabidopsis thaliana OX=3702 GN=AtENODL19 PE=2 SV=1	AtENODL19	0.712	0.0141593	Down	16.1	13	2	4	2	1.032	1.324	1.118	0.801	0.794	0.88	extracellular					GO:0005622 intracellular; GO:0005623 cell; GO:0005737 cytoplasm; GO:0005773 vacuole; GO:0005886 plasma membrane; GO:0016020 membrane; GO:0031224 intrinsic component of membrane; GO:0031225 anchored component of membrane; GO:0031226 intrinsic component of plasma membrane; GO:0043226 organelle; GO:0043227 membrane-bounded organelle; GO:0043229 intracellular organelle; GO:0043231 intracellular membr…		PF02298	Plastocyanin-like domain
Q9SUP5	AT4G23820	Pectin lyase-like superfamily protein OS=Arabidopsis thaliana OX=3702 GN=F9D16.290 PE=2 SV=1	F9D16.290	0.764	0.00469444	Down	48.6	7	3	4	3	1.134	1.213	1.048	0.869	0.832	0.893	chloroplast							PF00295	Glycosyl hydrolases family 28
Q9ZUK6	AT2G15050	Non-specific lipid-transfer protein 7 OS=Arabidopsis thaliana OX=3702 GN=LTP7 PE=2 SV=1	LTP7	0.769	0.00885031	Down	13	8	1	2	1	1.087	1.206	1.099	0.852	0.812	0.944	extracellular				GO:0000003 reproduction; GO:0000902 cell morphogenesis; GO:0000904 cell morphogenesis involved in differentiation; GO:0003006 developmental process involved in reproduction; GO:0006810 transport; GO:0006869 lipid transport; GO:0007275 multicellular organism development; GO:0009653 anatomical structure morphogenesis; GO:0009791 post-embryonic development; GO:0009826 unidimensional cell growth; GO:…	GO:0005576 extracellular region; GO:0005618 cell wall; GO:0005622 intracellular; GO:0005623 cell; GO:0005737 cytoplasm; GO:0005886 plasma membrane; GO:0009505 plant-type cell wall; GO:0009507 chloroplast; GO:0009534 chloroplast thylakoid; GO:0009536 plastid; GO:0009579 thylakoid; GO:0016020 membrane; GO:0030312 external encapsulating structure; GO:0031976 plastid thylakoid; GO:0031984 organelle s…	GO:0005488 binding; GO:0005515 protein binding; GO:0005516 calmodulin binding;

## Sheet: Ler_TM VS Ler_CK 
Table S1. Protein identification and abundance of differentially regulated proteins in Col, Ler and DM plants.
Protein accession	Locus	Protein description	Gene name	Ler_TM/Ler_CK Ratio	Ler_TM/Ler_CK P value	Regulated Type	MW [kDa]	Coverage [%]	Peptides	PSM	Unique Peptides	Ler_CK_1	Ler_CK_2	Ler_CK_3	Ler_TM_1	Ler_TM_2	Ler_TM_3
A0A1P8AUC4	AT1G33960	P-loop containing nucleoside triphosphate hydrolases superfamily protein	AIG1	1.508	0.00557348	Up	42.9	2	1	2	1	0.789	0.728	0.875	1.332	1.117	1.158
A0A1P8B2T9	AT2G19460	DUF3511 domain protein (DUF3511)	At2g19460	1.591	0.00784604	Up	19.5	7	1	1	1	0.708	0.858	0.75	1.054	1.337	1.293
A0A1P8B4B8	AT4G08410	Proline-rich extensin-like family protein	At4g08410	1.749	0.0300061	Up	17.7	13	1	1	1	0.911	0.597	0.675	1.557	1.05	1.211
A0A1P8B8R9	AT4G16660	heat shock protein 70 (Hsp 70) family protein	At4g16660	2.18	3.81252e-06	Up	99.6	17	13	23	13	0.606	0.624	0.653	1.378	1.364	1.362
A0A1P8B9P8	AT5G13320	Auxin-responsive GH3 family protein	PBS3	2.431	0.000584993	Up	66.9	5	2	4	2	0.596	0.498	0.655	1.38	1.533	1.339
A0A1P8BF32	AT5G42020	Heat shock protein 70 (Hsp 70) family protein	BIP2	1.914	6.39467e-06	Up	74.3	38	23	96	2	0.701	0.692	0.676	1.336	1.274	1.351
F4ICD9	AT1G18830	Transducin/WD40 repeat-like superfamily protein	SEC31A	1.838	0.000159437	Up	106.5	6	4	6	4	0.662	0.69	0.754	1.254	1.346	1.27
F4IJ44	AT2G41100	Calcium-binding EF hand family protein	TCH3	1.844	0.000229628	Up	32.8	38	9	17	9	0.664	0.709	0.741	1.326	1.208	1.364
F4JRE7	AT4G12720	MutT/nudix family protein	NUDT7	1.57	0.000408534	Up	36.5	2	1	1	1	0.771	0.729	0.834	1.187	1.246	1.232
F4K6M8	AT5G07340	Calreticulin family protein	At5g07340	1.752	0.000138438	Up	61.4	20	12	21	7	0.709	0.696	0.779	1.321	1.245	1.261
F4KEW8	AT5G58320	Kinase interacting (KIP1-like) family protein	NET4A	1.594	0.000938603	Up	64.1	2	1	1	1	0.734	0.85	0.728	1.214	1.199	1.273
O22263	AT2G47470	thioredoxin family protein	PDIL2-1	1.367	6.99697e-05	Up	39.5	42	12	24	11	0.853	0.816	0.856	1.143	1.173	1.135
O22869	AT2G43550	scorpion toxin-like knottin superfamily protein	ATTI6	1.368	0.0434448	Up	10.2	21	1	2	1	0.796	0.781	0.956	1.01	1.347	1.109
O23298	AT4G14420	HR-like lesion-inducing protein-like protein	dl3250c	1.323	0.015237	Up	17.4	5	1	1	1	0.889	0.839	0.854	1.12	1.278	1.019
O48723	AT2G26560	phospholipase A 2A	PLP2	1.337	0.000720507	Up	44.2	12	3	5	3	0.882	0.843	0.842	1.108	1.118	1.206
O48773	AT2G32920	PDI-like 2-3	PDIL2-3	1.639	1.2069e-06	Up	47.7	10	4	8	4	0.748	0.76	0.772	1.234	1.248	1.256
O49840	AT2G02800	protein kinase 2B	PBL3	1.373	0.00221685	Up	46.3	4	2	2	1	0.804	0.809	0.915	1.131	1.198	1.143
O64871	AT2G44370	Cysteine/Histidine-rich C1 domain family protein	At2g44370	1.413	0.000503769	Up	28	10	2	5	2	0.798	0.798	0.862	1.119	1.205	1.149
O80489	AT1G09180	secretion-associated RAS super family 1	ATSAR1	5.212	0.000605227	Up	22	33	6	14	2	0.247	0.32		1.389	1.583	1.461
O81062	AT2G03120	signal peptide peptidase	SPP	1.366	0.00867441	Up	38.3	5	2	5	2	0.814	0.8	0.943	1.102	1.255	1.136
O81865	AT4G19840	phloem protein 2-A1	PP2A1	1.354	0.00159839	Up	28.1	5	1	1	1	0.795	0.888	0.866	1.102	1.183	1.167
O82772	AT3G03640	beta glucosidase 25	BGLU25	1.84	4.77901e-05	Up	59.8	15	7	13	7	0.682	0.677	0.727	1.264	1.338	1.237
P05466	AT2G45300	RNA 3'-terminal phosphate cyclase/enolpyruvate transferase%2C alpha/beta	At2g45300	1.335	0.0157695	Up	55.7	28	12	23	2	0.871	0.833		1.107	1.235	1.071
P0CE10	AT4G01020	helicase domain-containing protein / IBR domain-containing protein / zinc finger protein-like protein	At4g01020	1.311	0.0243025	Up	202	0	1	3	1	0.84	0.811	0.945	1.031	1.105	1.268
P29402	AT5G61790	calnexin 1	CNX1	1.788	2.79703e-05	Up	60.4	28	15	36	10	0.71	0.687	0.746	1.294	1.245	1.293
P42760	AT1G02930	glutathione S-transferase 6	GSTF6	1.477	0.0129216	Up	23.5	42	8	28	3	0.768	0.741	0.882	1.011	1.267	1.254
Q38858	AT1G09210	calreticulin 1b	CRT2	1.541	0.00198883	Up	48.1	13	6	11	3	0.706	0.828	0.835	1.261	1.234	1.156
Q41906	AT2G40880	cystatin A	CYS3	2.579	7.72943e-05	Up	14.4	17	2	3	2	0.576	0.592	0.508	1.37	1.53	1.423
Q4V3D6	AT5G25260	SPFH/Band 7/PHB domain-containing membrane-associated protein family	FLOT2	1.666	0.000434654	Up	51.4	16	7	11	1	0.707	0.766	0.801	1.338	1.246	1.205
Q6NLB0	AT5G02780	glutathione transferase lambda 1	GSTL1	1.369	9.82206e-05	Up	27.2	3	1	1	1	0.853	0.86	0.819	1.152	1.184	1.131
Q6NQK0	AT1G76970	Target of Myb protein 1	TOL4	1.368	0.0209387	Up	49.2	8	2	2	1	0.889	0.898	0.747	1.03	1.266	1.17
Q84JN2	AT5G64510	tunicamycin induced protein	TIN1	2.479	0.000101754	Up	46.4	5	2	4	2	0.56	0.547	0.617	1.404	1.547	1.323
Q8H1B3	AT1G09080	Heat shock protein 70 (Hsp 70) family protein	BIP3	3.843	0.000475874	Up	75.1	26	16	29	13	0.44	0.41	0.361	1.651	1.224	1.779
Q8L9S0	AT1G29060	Target SNARE coiled-coil domain protein	At1g29060	1.955	0.000182566	Up	15.1	43	4	6	3	0.66	0.641	0.729	1.36	1.368	1.24
Q8RXL7	AT2G44080	ARGOS-like protein	ARL	1.826	0.00160839	Up	15	14	2	2	2	0.615	0.707	0.801	1.353	1.273	1.251
Q8RXX9	AT3G05200	RING/U-box superfamily protein	ATL6	1.368	0.0131018	Up	43.2	4	1	1	1	0.757	0.917	0.86	1.069	1.259	1.138
Q8S8Q6	AT2G23810	tetraspanin8	TET8	1.368	0.0013208	Up	30.6	10	3	4	3	0.811	0.816	0.898	1.14	1.116	1.199
Q8VX13	AT3G54960	PDI-like 1-3	PDIL1-3	1.59	0.000393007	Up	64.2	17	9	18	9	0.754	0.727	0.819	1.178	1.205	1.275
Q8VZ96	AT4G21810	DERLIN-2.1	DER2.1	1.324	0.00458683	Up	28.2	5	1	2	1	0.82	0.816	0.946	1.153	1.119	1.146
Q8VZJ5	AT5G23575	Transmembrane CLPTM1 family protein	At5g23575	1.341	0.00107966	Up	68.6	9	4	4	4	0.855	0.836	0.893	1.107	1.22	1.139
Q93WB8	AT3G13410	2-C-methyl-D-erythritol 4-phosphate cytidylyltransferase	At3g13410	1.425	0.00362856	Up	35	18	3	4	3	0.849	0.739	0.886	1.165	1.14	1.221
Q93ZE8	AT2G25110	stromal cell-derived factor 2-like protein precursor	SDF2	1.765	0.00101782	Up	23.9	15	2	3	2	0.669	0.808	0.693	1.22	1.359	1.25
Q94BT2	AT3G07390	auxin-induced in root cultures-like protein	AIR12	1.578	0.000104113	Up	27.9	9	2	2	2	0.747	0.76	0.82	1.23	1.205	1.236
Q94K76	AT5G18470	Curculin-like (mannose-binding) lectin family protein	At5g18470	1.321	0.000193385	Up	45.8	3	1	1	1	0.894	0.838	0.854	1.157	1.136	1.122
Q9C9U8	AT1G73630	EF hand calcium-binding protein family	CML26	1.481	0.000921056	Up	18	7	1	1	1	0.788	0.783	0.847	1.112	1.26	1.209
Q9FKM3	AT5G57480	P-loop containing nucleoside triphosphate hydrolases superfamily protein	At5g57480	1.456	0.00076657	Up	59.1	1	1	1	1	0.864	0.776	0.803	1.232	1.195	1.129
Q9FN75	AT5G17760	P-loop containing nucleoside triphosphate hydrolases superfamily protein	At5g17760	2.217	0.000245376	Up	57.4	16	7	13	6	0.577	0.598	0.672	1.398	1.449	1.248
Q9FX85	AT1G49570	Peroxidase superfamily protein	PER10	1.364	0.00306981	Up	38	3	1	1	1	0.81	0.845	0.883	1.139	1.244	1.079
Q9FXB0	AT1G56580	plant/protein (Protein of unknown function%2C DUF538)	SMALLER	1.963	3.01128e-05	Up	18.4	39	4	11	4	0.659	0.662	0.701	1.317	1.384	1.269
Q9LD45	AT5G47120	BAX inhibitor 1	BI-1	1.754	0.000450448	Up	27.5	3	1	1	1	0.682	0.777	0.72	1.334	1.305	1.182
Q9LIP9	AT3G24090	putative glucosamine-fructose-6-phosphate aminotransferase	GFAT	1.644	0.00135386	Up	74.6	9	4	7	4	0.831	0.741	0.674	1.189	1.249	1.255
Q9LKR3	AT5G28540	heat shock protein 70 (Hsp 70) family protein	BIP1	2.193	6.5069e-06	Up	73.6	39	23	92	1	0.637	0.639	0.603	1.418	1.338	1.365
Q9LP11	AT1G43910	P-loop containing nucleoside triphosphate hydrolases superfamily protein	At1g43910	1.374	0.00527945	Up	54.2	17	8	9	7	0.785	0.874	0.866	1.053	1.217	1.2
Q9LT78	AT3G19390	Granulin repeat cysteine protease family protein	RD21C	3.169	5.60314e-05	Up	49.3	2	1	1	1	0.521	0.457	0.461	1.524	1.644	1.392
Q9LVD6	AT5G57220	cytochrome P450%2C family 81%2C subfamily F%2C polypeptide 2	CYP81F2	1.357	0.00239263	Up	55.7	4	2	2	2	0.846	0.823	0.877	1.099	1.246	1.109
Q9LYV6	AT5G13200	GRAM domain family protein	At5g13200	1.637	0.000348192	Up	30.1	12	3	6	3	0.732	0.761	0.779	1.226	1.331	1.162
Q9LYW9	AT5G03160	DnaJ P58IPK-like protein	P58IPK	1.506	0.000243676	Up	53.7	16	7	18	7	0.777	0.842	0.815	1.166	1.243	1.257
Q9LZF8	AT5G03320	Protein kinase superfamily protein	PCRK2	1.32	0.0181275	Up	47	3	1	1	1	0.909	0.817	0.86	1.141	1.262	1.011
Q9LZK5	AT3G62600	DNAJ heat shock family protein	ERDJ3B	1.486	0.000525365	Up	39.2	10	5	9	5	0.743	0.847	0.805	1.167	1.192	1.201
Q9M9E1	AT1G15520	pleiotropic drug resistance 12	ABCG40	1.711	0.0208214	Up	160.9	1	2	2	1	0.716	0.575	0.922	1.393	1.13	1.264
Q9M9S6	AT1G14360	UDP-galactose transporter 3	UTR3	1.75	0.000929895	Up	36.7	4	1	1	1	0.717	0.652	0.813	1.258	1.287	1.274
Q9MA63	AT3G05500	Rubber elongation factor protein (REF)	At3g05500	1.32	0.00122534	Up	27.2	21	4	5	4	0.826	0.876	0.883	1.16	1.174	1.078
Q9MAU6	AT1G04980	PDI-like 2-2	PDIL2-2	1.356	0.000705732	Up	48.4	14	4	10	4	0.813	0.884	0.876	1.121	1.19	1.179
Q9S7H8	AT1G74710	ADC synthase superfamily protein	ICS1	1.947	0.000940039	Up	68.9	6	2	3	2	0.635	0.64	0.761	1.382	1.385	1.197
Q9SB64	AT4G24690	ubiquitin-associated (UBA)/TS-N domain-containing protein / octicosapeptide/Phox/Bemp1 (PB1) domain-containing protein	NBR1	1.39	0.0039196	Up	76.1	11	5	6	5	0.796	0.82	0.854	1.257	1.119	1.058
Q9SJC4	AT2G04450	nudix hydrolase homolog 6	NUDT6	1.603	0.00270302	Up	31.9	7	2	2	2	0.663	0.818	0.824	1.248	1.207	1.239
Q9SR96	AT3G08970	DNAJ heat shock N-terminal domain-containing protein	ERDJ3A	2.782	1.10201e-05	Up	62.5	13	6	13	6	0.487	0.524	0.55	1.46	1.473	1.41
Q9SRG3	AT1G77510	PDI-like 1-2	PDIL1-2	2.023	1.36647e-05	Up	56.3	56	23	66	18	0.631	0.678	0.666	1.333	1.37	1.292
Q9SRY5	AT1G02920	glutathione S-transferase 7	GSTF7	1.43	0.00177849	Up	23.6	31	6	25	1	0.862	0.89	0.762	1.195	1.222	1.177
Q9STT1	AT3G47820	PLANT U-BOX 39	PUB39	1.317	0.00758803	Up	57.6	2	1	1	1	0.817	0.878	0.895	1.035	1.162	1.213
Q9STX5	AT4G24190	Chaperone protein htpG family protein	HSP90-7	1.406	0.00195129	Up	94.1	16	13	27	12	0.8	0.833	0.874	1.19	1.089	1.246
Q9SU72	AT3G48090	alpha/beta-Hydrolases superfamily protein	EDS1	1.441	0.00115419	Up	71.6	9	5	6	5	0.823	0.763	0.854	1.216	1.194	1.106
Q9SU93	AT4G29520	nucleophosmin	At4g29520	2.043	1.15451e-05	Up	34.3	28	8	12	8	0.639	0.639	0.68	1.375	1.327	1.298
Q9SUC6	AT4G20860	FAD-binding Berberine family protein	FAD-OXR	1.368	0.00112171	Up	60.4	9	4	8	4	0.853	0.792	0.888	1.176	1.116	1.173
Q9SV06	AT3G51980	ARM repeat superfamily protein	F4F15.90	2.536	3.16052e-05	Up	42.5	17	4	8	4	0.55	0.533	0.617	1.454	1.429	1.429
Q9SVC2	AT3G52400	syntaxin of plants 122	SYP122	1.399	2.62383e-05	Up	37.8	9	3	5	3	0.831	0.82	0.85	1.148	1.192	1.159
Q9XEE6	AT2G40140	zinc finger (CCCH-type) family protein	At2g40140	1.372	0.0174585	Up	66.1	3	1	1	1	0.845	0.841	0.844	1.199	1.285	0.986
Q9XGZ3	AT5G25940	early nodulin-like protein	At5g25940	1.33	0.00485195	Up	12.3	8	1	1	1	0.803	0.893	0.88	1.201	1.059	1.165
Q9XI01	AT1G21750	PDI-like 1-1	PDIL1-1	1.649	2.52897e-05	Up	55.6	43	17	58	13	0.746	0.738	0.766	1.219	1.286	1.206
Q9ZV52	AT2G18660	plant natriuretic peptide A	EGC2	1.782	0.000835078	Up	14.5	18	3	5	3	0.695	0.661	0.801	1.343	1.285	1.216
Q9ZVX3	AT2G16900	phospholipase-like protein (PEARLI 4) family protein	At2g16900	1.362	0.0360532	Up	42.5	9	3	3	3	0.822	0.713	1.005	1.164	1.196	1.1
Q9ZW21	AT2G29380	highly ABA-induced PP2C protein 3	At2g29380	2.32	6.36639e-07	Up	40.3	4	1	2	1	0.605	0.603	0.599	1.428	1.358	1.407
F4J0F0	AT3G28830	mucin-like protein%2C putative (DUF1216)	At3g28830	0.359	6.41045e-05	Down	55.5	1	1	1	1	1.483	1.462	1.469	0.474	0.531	0.581
O22960	AT2G34070	TRICHOME BIREFRINGENCE-LIKE 37	TBL37	0.721	0.0035814	Down	43.3	6	2	2	2	1.206	1.111	1.17	0.802	0.92	0.792
O80823	AT2G45970	cytochrome P450%2C family 86%2C subfamily A%2C polypeptide 8	CYP86A8	0.734	0.000149707	Down	60.9	7	4	7	4	1.16	1.102	1.184	0.838	0.838	0.852
O81417	AT4G02270	root hair specific 13	RHS13	0.688	0.00266822	Down	18.1	7	1	1	1	1.131	1.146	1.276	0.84	0.856	0.75
O82167	AT2G35260	CAAX protease self-immunity protein	At2g35260	0.741	0.00407753	Down	41.7	4	1	2	1	1.234	1.043	1.169	0.86	0.838	0.856
P0DI10	AT1G05240	Peroxidase superfamily protein	PER1	0.601	9.47414e-05	Down	35.6	17	4	9	4	1.264	1.208	1.275	0.732	0.793	0.728
P93013	AT2G33790	arabinogalactan protein 30	AGP30	0.761	0.000620403	Down	25.7	7	1	1	1	1.111	1.102	1.195	0.858	0.883	0.852
P93046	AT3G44990	xyloglucan endo-transglycosylase-related 8	XTH31	0.682	0.00776287	Down	33.5	11	2	4	2	1.187	1.08	1.307	0.749	0.899	0.79
Q38890	AT5G49720	glycosyl hydrolase 9A1	KOR	0.726	0.00197985	Down	69.1	7	4	5	4	1.153	1.106	1.257	0.818	0.887	0.848
Q43873	AT5G67400	root hair specific 19	PER73	0.657	0.000499236	Down	35.9	6	2	2	1	1.145	1.189	1.286	0.815	0.759	0.805
Q84MC1	AT4G31290	ChaC-like family protein	GGCT2;2	0.733	0.00503185	Down	25.6	8	2	3	2	1.069	1.262	1.183	0.815	0.891	0.871
Q8LCP6	AT1G75680	glycosyl hydrolase 9B7	At1g75680	0.765	0.000668498	Down	57.8	14	6	7	6	1.095	1.121	1.188	0.866	0.89	0.848
Q8LPL3	AT5G21100	Plant L-ascorbate oxidase	At5g21100	0.742	0.00511305	Down	64.2	3	1	3	1	1.063	1.196	1.185	0.85	0.909	0.797
Q94CB1	AT3G10720	Plant invertase/pectin methylesterase inhibitor superfamily	PME25	0.75	0.00291616	Down	67.9	3	2	3	1	1.09	1.168	1.17	0.798	0.909	0.864
Q9C8S1	AT1G29980	choice-of-anchor C domain protein%2C putative (Protein of unknown function%2C DUF642)	At1g29980	0.718	0.0350798	Down	44.3	6	2	3	1	1.168	1.252	1.071	0.918	0.909	0.681
Q9FME5	AT5G60950	COBRA-like protein 5 precursor	COBL5	0.707	0.0224312	Down	22.5	4	1	1	1	1.076	1.123	1.316	0.764	0.956	0.766
Q9LNP3	AT1G17620	Late embryogenesis abundant (LEA) hydroxyproline-rich glycoprotein family	At1g17620	0.763	0.00242064	Down	28.3	9	2	2	2	1.082	1.173	1.168	0.82	0.902	0.89
Q9LTC9	AT3G23190	HR-like lesion-inducing protein-like protein	At3g23190	0.762	0.0105286	Down	24.5	3	1	1	1	1.098	1.132	1.175	0.838	0.963	0.795
Q9LU14	AT3G16370	GDSL-like Lipase/Acylhydrolase superfamily protein	APG	0.687	0.00117703	Down	38.2	15	5	5	5	1.122	1.15	1.237	0.802	0.853	0.756
Q9LX31	AT3G59400	protein GENOMES UNCOUPLED 4	GUN4	0.762	0.000496681	Down	29.6	14	3	9	3	1.121	1.109	1.153	0.846	0.9	0.833
Q9LZ72	AT5G04530	3-ketoacyl-CoA synthase 19	KCS19	0.754	0.00235227	Down	52.6	9	4	8	4	1.13	1.089	1.209	0.855	0.906	0.825
Q9M038	AT5G01340	Mitochondrial substrate carrier family protein	SFC1	0.751	0.0295458	Down	34	6	1	1	1	1.083	1.274	1.069	0.904	0.92	0.749
Q9M0I2	AT4G28250	expansin B3	EXPB3	0.732	0.00796102	Down	28.4	8	2	2	2	1.104	1.092	1.267	0.778	0.891	0.867
Q9M8Y5	AT3G04290	Li-tolerant lipase 1	LTL1	0.674	0.00619443	Down	40.1	13	3	4	3	1.153	1.204	1.226	0.768	0.924	0.724
Q9MAJ7	AT1G45130	beta-galactosidase 5	BGAL5	0.759	0.0148956	Down	81.4	2	1	1	1	1.068	1.126	1.217	0.93	0.888	0.772
Q9SLA7	AT2G25560	DNAJ heat shock N-terminal domain-containing protein	At2g25560	0.766	0.0241086	Down	73.1	2	1	1	1	1.112	1.176	1.109	0.991	0.843	0.768
Q9STL4	AT3G48340	Cysteine proteinases superfamily protein	CEP2	0.648	0.00415046	Down	40.3	11	3	4	3	1.193	1.127	1.321	0.699	0.836	0.824
Q9STZ8	AT4G12880	early nodulin-like protein 19	AtENODL19	0.73	0.00304025	Down	16.1	13	2	3	2	1.122	1.097	1.249	0.798	0.859	0.875
Q9SVZ8	AT4G25870	Core-2/I-branching beta-1%2C6-N-acetylglucosaminyltransferase family protein	At4g25870	0.753	0.00117489	Down	45	4	2	2	2	1.137	1.102	1.185	0.824	0.904	0.849
Q9SXS2	AT1G23090	sulfate transporter 91	SULTR3;3	0.262	6.70875e-06	Down	69	4	2	2	2	1.572	1.483	1.7	0.421	0.424	0.4
Q9ZSU4	AT4G25820	xyloglucan endotransglucosylase/hydrolase 14	XTH14	0.694	0.00346158	Down	32.7	16	4	7	4	1.114	1.142	1.245	0.762	0.89	0.778

## Sheet: DM_TM VS DM_CK 
Table S1. Protein identification and abundance of differentially regulated proteins in Col, Ler and DM plants.
Protein accession	Locus	Protein description	Gene name	DM_TM/DM_CK Ratio	DM_TM/DM_CK P value	Regulated Type	MW [kDa]	Coverage [%]	Peptides	PSM	Unique Peptides	DM_CK_1	DM_CK_2	DM_CK_3	DM_TM_1	DM_TM_2	DM_TM_3	Subcellular localization	KEGG KO No.	KEGG Gene	KEGG pathway	Biological Process	Cellular Component	Molecular Function	Pfam ID	Domain description	KOG category	KOG NO.	KOG description
A0A178UGU8	AT5G11920	6-&1-fructan exohydrolase OS=Arabidopsis thaliana OX=3702 GN=cwINV6 PE=3 SV=1	cwINV6	1.319	0.00966345	Up	58	8	4	4	4	0.882	0.902	0.805	1.038	1.153	1.223	chloroplast	K01193	INV, sacA; beta-fructofuranosidase [EC:3.2.1.26]	map00052 Galactose metabolism; map00500 Starch and sucrose metabolism; map01100 Metabolic pathways				PF00251; PF08244	Glycosyl hydrolases family 32 N-terminal domain; Glycosyl hydrolases family 32 C terminal	G	KOG0228	Beta-fructofuranosidase (invertase)
A0A178W3M8	AT1G30270	Non-specific serine/threonine protein kinase OS=Arabidopsis thaliana OX=3702 GN=CIPK23 PE=3 SV=1	CIPK23	1.538	0.000115711	Up	42.8	4	1	2	1	0.794	0.779	0.791	1.146	1.257	1.232	chloroplast				GO:0001101 response to acid chemical; GO:0006464 cellular protein modification process; GO:0006468 protein phosphorylation; GO:0006793 phosphorus metabolic process; GO:0006796 phosphate-containing compound metabolic process; GO:0006807 nitrogen compound metabolic process; GO:0006810 transport; GO:0006811 ion transport; GO:0006812 cation transport; GO:0006813 potassium ion transport; GO:0006950 re…	GO:0005622 intracellular; GO:0005623 cell; GO:0005634 nucleus; GO:0005737 cytoplasm; GO:0005829 cytosol; GO:0005886 plasma membrane; GO:0009536 plastid; GO:0016020 membrane; GO:0043226 organelle; GO:0043227 membrane-bounded organelle; GO:0043229 intracellular organelle; GO:0043231 intracellular membrane-bounded organelle; GO:0044424 intracellular part; GO:0044444 cytoplasmic part; GO:0044464 cell…	GO:0003824 catalytic activity; GO:0004672 protein kinase activity; GO:0004674 protein serine/threonine kinase activity; GO:0016301 kinase activity; GO:0016740 transferase activity; GO:0016772 transferase activity, transferring phosphorus-containing groups; GO:0016773 phosphotransferase activity, alcohol group as acceptor;	PF00069; PF03822	Protein kinase domain; NAF domain	T	KOG0583	Serine/threonine protein kinase
A0A1P8AQT8	AT1G65310	Xyloglucan endotransglucosylase/hydrolase OS=Arabidopsis thaliana OX=3702 GN=XTH17 PE=3 SV=1	XTH17	1.335	0.000371802	Up	34.6	9	2	2	1	0.853	0.866	0.851	1.201	1.106	1.123	nucleus	K08235	E2.4.1.207; xyloglucan:xyloglucosyl transferase [EC:2.4.1.207]		GO:0005975 carbohydrate metabolic process; GO:0005976 polysaccharide metabolic process; GO:0006073 cellular glucan metabolic process; GO:0006950 response to stress; GO:0008152 metabolic process; GO:0008283 cell proliferation; GO:0009266 response to temperature stimulus; GO:0009408 response to heat; GO:0009409 response to cold; GO:0009605 response to external stimulus; GO:0009612 response to mecha…	GO:0005618 cell wall; GO:0005622 intracellular; GO:0005623 cell; GO:0005737 cytoplasm; GO:0005794 Golgi apparatus; GO:0005886 plasma membrane; GO:0009505 plant-type cell wall; GO:0012505 endomembrane system; GO:0016020 membrane; GO:0030312 external encapsulating structure; GO:0043226 organelle; GO:0043227 membrane-bounded organelle; GO:0043229 intracellular organelle; GO:0043231 intracellular mem…	GO:0003824 catalytic activity; GO:0016740 transferase activity; GO:0016757 transferase activity, transferring glycosyl groups; GO:0016758 transferase activity, transferring hexosyl groups; GO:0016762 xyloglucan:xyloglucosyl transferase activity; GO:0046527 glucosyltransferase activity;	PF00722	Glycosyl hydrolases family 16
A0A1P8ASS1	AT1G03040	Basic helix-loop-helix (BHLH) DNA-binding superfamily protein OS=Arabidopsis thaliana OX=3702 GN=At1g03040 PE=4 SV=1	At1g03040	1.309	0.0385864	Up	36.3	5	1	1	1	0.746	0.981	0.872	1.039	1.181	1.181	nucleus				GO:0000003 reproduction; GO:0006139 nucleobase-containing compound metabolic process; GO:0006351 transcription, DNA-templated; GO:0006355 regulation of transcription, DNA-templated; GO:0006357 regulation of transcription from RNA polymerase II promoter; GO:0006366 transcription from RNA polymerase II promoter; GO:0006725 cellular aromatic compound metabolic process; GO:0006807 nitrogen compound m…	GO:0005622 intracellular; GO:0005623 cell; GO:0005634 nucleus; GO:0043226 organelle; GO:0043227 membrane-bounded organelle; GO:0043229 intracellular organelle; GO:0043231 intracellular membrane-bounded organelle; GO:0044424 intracellular part; GO:0044464 cell part;	GO:0000976 transcription regulatory region sequence-specific DNA binding; GO:0000981 RNA polymerase II transcription factor activity, sequence-specific DNA binding; GO:0001046 core promoter sequence-specific DNA binding; GO:0001047 core promoter binding; GO:0001067 regulatory region nucleic acid binding; GO:0001228 transcriptional activator activity, RNA polymerase II transcription regulatory reg…	PF00010	Helix-loop-helix DNA-binding domain
A0A1P8AUC4	AT1G33960	p-loop containing nucleoside triphosphate hydrolases superfamily protein OS=Arabidopsis thaliana OX=3702 GN=AIG1 PE=4 SV=1	AIG1	2.191	0.00015147	Up	42.9	6	2	2	2	0.678	0.572	0.63	1.311	1.44	1.369	chloroplast				GO:0009605 response to external stimulus; GO:0009607 response to biotic stimulus; GO:0009617 response to bacterium; GO:0043207 response to external biotic stimulus; GO:0050896 response to stimulus; GO:0051704 multi-organism process; GO:0051707 response to other organism;	GO:0005622 intracellular; GO:0005623 cell; GO:0005737 cytoplasm; GO:0005773 vacuole; GO:0005774 vacuolar membrane; GO:0016020 membrane; GO:0031090 organelle membrane; GO:0043226 organelle; GO:0043227 membrane-bounded organelle; GO:0043229 intracellular organelle; GO:0043231 intracellular membrane-bounded organelle; GO:0044422 organelle part; GO:0044424 intracellular part; GO:0044437 vacuolar part…	GO:0005488 binding; GO:0030246 carbohydrate binding;	PF04548	AIG1 family
A0A1P8AYF2	AT2G24980	Proline-rich extensin-like family protein OS=Arabidopsis thaliana OX=3702 GN=EXT6 PE=4 SV=1	EXT6	4.455	8.22737e-05	Up	63.8	56	1	3	1	0.349	0.357	0.394	1.379	1.815	1.706	extracellular
A0A1P8B8R9	AT4G16660	Heat shock protein 70 (Hsp 70) family protein OS=Arabidopsis thaliana OX=3702 GN=At4g16660 PE=4 SV=1	At4g16660	1.668	0.0194997	Up	99.6	11	9	12	9	0.729	0.715	0.806	1.582	1.102	1.068	chloroplast	K09486	HYOU1; hypoxia up-regulated 1	map04141 Protein processing in endoplasmic reticulum		GO:0005622 intracellular; GO:0005623 cell; GO:0005737 cytoplasm; GO:0005773 vacuole; GO:0005774 vacuolar membrane; GO:0005783 endoplasmic reticulum; GO:0005794 Golgi apparatus; GO:0009507 chloroplast; GO:0009536 plastid; GO:0012505 endomembrane system; GO:0016020 membrane; GO:0031090 organelle membrane; GO:0043226 organelle; GO:0043227 membrane-bounded organelle; GO:0043229 intracellular organell…				O	KOG0104	Molecular chaperones GRP170/SIL1, HSP70 superfamily
A0A1P8B9P8	AT5G13320	Auxin-responsive GH3 family protein OS=Arabidopsis thaliana OX=3702 GN=PBS3 PE=4 SV=1	PBS3	1.841	0.000313595	Up	66.9	3	1	1	1	0.718	0.667	0.727	1.288	1.199	1.401	cytoplasm	K14487	GH3; auxin responsive GH3 gene family	map04075 Plant hormone signal transduction	GO:0001101 response to acid chemical; GO:0001666 response to hypoxia; GO:0002376 immune system process; GO:0002682 regulation of immune system process; GO:0002684 positive regulation of immune system process; GO:0002831 regulation of response to biotic stimulus; GO:0006082 organic acid metabolic process; GO:0006725 cellular aromatic compound metabolic process; GO:0006950 response to stress; GO:00…		GO:0003824 catalytic activity; GO:0016874 ligase activity; GO:0016879 ligase activity, forming carbon-nitrogen bonds; GO:0016881 acid-amino acid ligase activity; GO:0052625 4-aminobenzoate amino acid synthetase activity; GO:0052626 benzoate amino acid synthetase activity; GO:0052627 vanillate amino acid synthetase activity; GO:0052628 4-hydroxybenzoate amino acid synthetase activity;
A4FVS9	AT1G76360	At1g76360 OS=Arabidopsis thaliana OX=3702 GN=At1g76360 PE=2 SV=1	At1g76360	1.417	0.00542944	Up	54.1	5	2	4	1	0.904	0.792	0.787	1.132	1.279	1.107	chloroplast	K04733	IRAK4; interleukin-1 receptor-associated kinase 4 [EC:2.7.11.1]					PF07714	Protein tyrosine kinase	T	KOG1187	Serine/threonine protein kinase
B9DGF6	AT3G15770	AT3G15770 protein OS=Arabidopsis thaliana OX=3702 GN=At3g15770 PE=2 SV=1	At3g15770	1.474	0.000328086	Up	18	11	1	1	1	0.762	0.826	0.837	1.168	1.232	1.175	chloroplast
F4HWQ8	AT1G47960	Cell wall / vacuolar inhibitor of fructosidase 1 OS=Arabidopsis thaliana OX=3702 GN=C/VIF1 PE=1 SV=1	C/VIF1	1.306	0.0119766	Up	22.3	8	1	3	1	0.825	0.908	0.869	1.028	1.131	1.239	extracellular				GO:0000003 reproduction; GO:0000902 cell morphogenesis; GO:0000904 cell morphogenesis involved in differentiation; GO:0003006 developmental process involved in reproduction; GO:0009653 anatomical structure morphogenesis; GO:0009826 unidimensional cell growth; GO:0009856 pollination; GO:0009860 pollen tube growth; GO:0009932 cell tip growth; GO:0009987 cellular process; GO:0016043 cellular compone…	GO:0005618 cell wall; GO:0005623 cell; GO:0012505 endomembrane system; GO:0030312 external encapsulating structure; GO:0030427 site of polarized growth; GO:0035838 growing cell tip; GO:0042995 cell projection; GO:0044463 cell projection part; GO:0044464 cell part; GO:0051286 cell tip; GO:0071944 cell periphery; GO:0090404 pollen tube tip; GO:0090406 pollen tube;	GO:0004857 enzyme inhibitor activity; GO:0030234 enzyme regulator activity; GO:0046910 pectinesterase inhibitor activity; GO:0098772 molecular function regulator;	PF04043	Plant invertase/pectin methylesterase inhibitor
F4IJ44	AT2G41100	Calcium-binding EF hand family protein OS=Arabidopsis thaliana OX=3702 GN=TCH3 PE=4 SV=1	TCH3	2.119	0.000153763	Up	32.8	27	6	13	6	0.673	0.617	0.6	1.438	1.318	1.248	cytoplasm	K13448	CML; calcium-binding protein CML	map04626 Plant-pathogen interaction	GO:0006109 regulation of carbohydrate metabolic process; GO:0006950 response to stress; GO:0006979 response to oxidative stress; GO:0007154 cell communication; GO:0007165 signal transduction; GO:0009314 response to radiation; GO:0009416 response to light stimulus; GO:0009605 response to external stimulus; GO:0009606 tropism; GO:0009612 response to mechanical stimulus; GO:0009628 response to abiot…	GO:0005622 intracellular; GO:0005623 cell; GO:0005737 cytoplasm; GO:0005773 vacuole; GO:0005774 vacuolar membrane; GO:0005856 cytoskeleton; GO:0005874 microtubule; GO:0005911 cell-cell junction; GO:0009506 plasmodesma; GO:0015630 microtubule cytoskeleton; GO:0016020 membrane; GO:0030054 cell junction; GO:0031090 organelle membrane; GO:0043226 organelle; GO:0043227 membrane-bounded organelle; GO:0…	GO:0005488 binding; GO:0005509 calcium ion binding; GO:0043167 ion binding; GO:0043169 cation binding; GO:0046872 metal ion binding;	PF13833; PF13499	EF-hand domain pair; EF-hand domain pair	T	KOG0027	Calmodulin and related proteins (EF-Hand superfamily)
F4JL78	AT4G28300	Formin-like protein (DUF1421) OS=Arabidopsis thaliana OX=3702 GN=At4g28300 PE=1 SV=1	At4g28300	1.301	0.033857	Up	48	8	2	4	2	0.895	0.783	0.93	0.991	1.2	1.201	nucleus							PF07223	Protein of unknown function (DUF1421)
F4JQ50	AT4G24160	Alpha/beta-Hydrolases superfamily protein OS=Arabidopsis thaliana OX=3702 GN=At4g24160 PE=4 SV=1	At4g24160	1.357	0.0308462	Up	38	7	1	1	1	0.986	0.76	0.8	1.11	1.27	1.075	nucleus	K13699	ABHD5, CGI-58; abhydrolase domain-containing protein 5 [EC:2.3.1.51]		GO:0042592 homeostatic process; GO:0048878 chemical homeostasis; GO:0050801 ion homeostasis; GO:0055081 anion homeostasis; GO:0055088 lipid homeostasis; GO:0055089 fatty acid homeostasis; GO:0055090 acylglycerol homeostasis; GO:0055091 phospholipid homeostasis; GO:0065007 biological regulation; GO:0065008 regulation of biological quality; GO:0070328 triglyceride homeostasis;		GO:0003824 catalytic activity; GO:0004620 phospholipase activity; GO:0004623 phospholipase A2 activity; GO:0016298 lipase activity; GO:0016740 transferase activity; GO:0016746 transferase activity, transferring acyl groups; GO:0016747 transferase activity, transferring acyl groups other than amino-acyl groups; GO:0016787 hydrolase activity; GO:0016788 hydrolase activity, acting on ester bonds; GO…	PF00561	alpha/beta hydrolase fold	S	KOG4409	Predicted hydrolase/acyltransferase (alpha/beta hydrolase superfamily)
F4JRE7	AT4G12720	MutT/nudix family protein OS=Arabidopsis thaliana OX=3702 GN=NUDT7 PE=4 SV=1	NUDT7	1.386	0.00224804	Up	36.5	7	2	5	2	0.854	0.781	0.88	1.098	1.168	1.219	cytoplasm				GO:0006950 response to stress; GO:0006979 response to oxidative stress; GO:0009605 response to external stimulus; GO:0009607 response to biotic stimulus; GO:0009966 regulation of signal transduction; GO:0009967 positive regulation of signal transduction; GO:0010646 regulation of cell communication; GO:0010647 positive regulation of cell communication; GO:0023051 regulation of signaling; GO:002305…	GO:0005622 intracellular; GO:0005623 cell; GO:0005634 nucleus; GO:0005737 cytoplasm; GO:0005829 cytosol; GO:0005886 plasma membrane; GO:0016020 membrane; GO:0043226 organelle; GO:0043227 membrane-bounded organelle; GO:0043229 intracellular organelle; GO:0043231 intracellular membrane-bounded organelle; GO:0044424 intracellular part; GO:0044444 cytoplasmic part; GO:0044464 cell part; GO:0071944 ce…	GO:0000166 nucleotide binding; GO:0003824 catalytic activity; GO:0004551 nucleotide diphosphatase activity; GO:0005488 binding; GO:0016462 pyrophosphatase activity; GO:0016787 hydrolase activity; GO:0016817 hydrolase activity, acting on acid anhydrides; GO:0016818 hydrolase activity, acting on acid anhydrides, in phosphorus-containing anhydrides; GO:0035529 NADH pyrophosphatase activity; GO:00360…	PF00293	NUDIX domain	T	KOG0648	Predicted NUDIX hydrolase FGF-2 and related proteins
O03983	AT1G01470	Probable desiccation-related protein LEA14 OS=Arabidopsis thaliana OX=3702 GN=LEA14 PE=1 SV=1	LEA14	1.304	0.0433574	Up	16.5	23	4	5	4	0.937	0.841	0.874	0.98	1.175	1.302	cytoplasm				GO:0006950 response to stress; GO:0006952 defense response; GO:0009314 response to radiation; GO:0009416 response to light stimulus; GO:0009605 response to external stimulus; GO:0009607 response to biotic stimulus; GO:0009611 response to wounding; GO:0009620 response to fungus; GO:0009628 response to abiotic stimulus; GO:0009642 response to light intensity; GO:0009644 response to high light inten…	GO:0005576 extracellular region; GO:0005622 intracellular; GO:0005623 cell; GO:0005737 cytoplasm; GO:0005829 cytosol; GO:0005886 plasma membrane; GO:0016020 membrane; GO:0044424 intracellular part; GO:0044444 cytoplasmic part; GO:0044464 cell part; GO:0048046 apoplast; GO:0071944 cell periphery;		PF03168	Late embryogenesis abundant protein
O23429	AT4G15780	Vesicle-associated membrane protein 724 OS=Arabidopsis thaliana OX=3702 GN=VAMP724 PE=2 SV=2	VAMP724	1.307	0.0048468	Up	25.2	9	2	2	2	0.826	0.927	0.848	1.066	1.19	1.144	nucleus	K08511	ATVAMP72; vesicle-associated membrane protein 72		GO:0006810 transport; GO:0006887 exocytosis; GO:0006906 vesicle fusion; GO:0006996 organelle organization; GO:0009987 cellular process; GO:0016043 cellular component organization; GO:0016050 vesicle organization; GO:0016192 vesicle-mediated transport; GO:0032940 secretion by cell; GO:0046903 secretion; GO:0048284 organelle fusion; GO:0051179 localization; GO:0051234 establishment of localization;…	GO:0005622 intracellular; GO:0005623 cell; GO:0005737 cytoplasm; GO:0016020 membrane; GO:0031201 SNARE complex; GO:0032991 macromolecular complex; GO:0044424 intracellular part; GO:0044425 membrane part; GO:0044444 cytoplasmic part; GO:0044464 cell part; GO:0098796 membrane protein complex;	GO:0000149 SNARE binding; GO:0005484 SNAP receptor activity; GO:0005488 binding; GO:0005515 protein binding;	PF13774	Regulated-SNARE-like domain	U	KOG0859	Synaptobrevin/VAMP-like protein
O23553	AT4G17090	Beta-amylase 3, chloroplastic OS=Arabidopsis thaliana OX=3702 GN=BAM3 PE=1 SV=3	BAM3	1.561	0.000374629	Up	61.3	37	17	36	17	0.765	0.778	0.799	1.128	1.257	1.27	nucleus	K01177	E3.2.1.2; beta-amylase [EC:3.2.1.2]	map00500 Starch and sucrose metabolism; map01100 Metabolic pathways	GO:0000023 maltose metabolic process; GO:0000024 maltose biosynthetic process; GO:0000272 polysaccharide catabolic process; GO:0001101 response to acid chemical; GO:0005975 carbohydrate metabolic process; GO:0005976 polysaccharide metabolic process; GO:0005982 starch metabolic process; GO:0005983 starch catabolic process; GO:0005984 disaccharide metabolic process; GO:0006073 cellular glucan metab…	GO:0005622 intracellular; GO:0005623 cell; GO:0005634 nucleus; GO:0005737 cytoplasm; GO:0005829 cytosol; GO:0009507 chloroplast; GO:0009532 plastid stroma; GO:0009536 plastid; GO:0009570 chloroplast stroma; GO:0043226 organelle; GO:0043227 membrane-bounded organelle; GO:0043229 intracellular organelle; GO:0043231 intracellular membrane-bounded organelle; GO:0044422 organelle part; GO:0044424 intr…	GO:0003824 catalytic activity; GO:0004553 hydrolase activity, hydrolyzing O-glycosyl compounds; GO:0016160 amylase activity; GO:0016161 beta-amylase activity; GO:0016787 hydrolase activity; GO:0016798 hydrolase activity, acting on glycosyl bonds;	PF01373	Glycosyl hydrolase family 14
O48723	AT2G26560	Patatin-like protein 2 OS=Arabidopsis thaliana OX=3702 GN=PLP2 PE=1 SV=1	PLP2	1.664	0.00694591	Up	44.2	5	1	1	1	0.699	0.76	0.793	1.228	1.457	1.063	chloroplast				GO:0001666 response to hypoxia; GO:0002252 immune effector process; GO:0002376 immune system process; GO:0006082 organic acid metabolic process; GO:0006629 lipid metabolic process; GO:0006631 fatty acid metabolic process; GO:0006633 fatty acid biosynthetic process; GO:0006950 response to stress; GO:0006952 defense response; GO:0006955 immune response; GO:0008152 metabolic process; GO:0008219 cell…	GO:0005622 intracellular; GO:0005623 cell; GO:0005737 cytoplasm; GO:0016020 membrane; GO:0044424 intracellular part; GO:0044464 cell part;	GO:0003824 catalytic activity; GO:0004620 phospholipase activity; GO:0016298 lipase activity; GO:0016787 hydrolase activity; GO:0016788 hydrolase activity, acting on ester bonds; GO:0047372 acylglycerol lipase activity; GO:0052689 carboxylic ester hydrolase activity;			I	KOG0513	Ca2+-independent phospholipase A2
O49304	AT1G23130	At1g23130/T26J12_10 OS=Arabidopsis thaliana OX=3702 GN=At1g23130 PE=2 SV=1	At1g23130	1.338	0.000124139	Up	17.8	14	3	7	3	0.859	0.856	0.851	1.1	1.167	1.166	cytoplasm					GO:0005622 intracellular; GO:0005623 cell; GO:0005737 cytoplasm; GO:0009507 chloroplast; GO:0009536 plastid; GO:0043226 organelle; GO:0043227 membrane-bounded organelle; GO:0043229 intracellular organelle; GO:0043231 intracellular membrane-bounded organelle; GO:0044424 intracellular part; GO:0044444 cytoplasmic part; GO:0044464 cell part;		PF00407	Pathogenesis-related protein Bet v I family
O82201	AT2G19790	AP-4 complex subunit sigma OS=Arabidopsis thaliana OX=3702 GN=At2g19790 PE=1 SV=1	At2g19790	1.506	0.00143559	Up	16.9	8	1	1	1	0.788	0.772	0.834	1.293	1.101	1.212	mitochondria	K12403	AP4S1; AP-4 complex subunit sigma-1			GO:0005622 intracellular; GO:0005623 cell; GO:0005737 cytoplasm; GO:0005794 Golgi apparatus; GO:0005802 trans-Golgi network; GO:0012505 endomembrane system; GO:0016020 membrane; GO:0030117 membrane coat; GO:0030119 AP-type membrane coat adaptor complex; GO:0030124 AP-4 adaptor complex; GO:0031984 organelle subcompartment; GO:0032991 macromolecular complex; GO:0043226 organelle; GO:0043227 membran…		PF01217	Clathrin adaptor complex small chain	U	KOG0934	Clathrin adaptor complex, small subunit
O82382	AT2G29740	UDP-glycosyltransferase 71C2 OS=Arabidopsis thaliana OX=3702 GN=UGT71C2 PE=1 SV=1	UGT71C2	1.316	0.00265382	Up	53.2	10	4	4	4	0.871	0.854	0.892	1.065	1.217	1.161	chloroplast				GO:0001101 response to acid chemical; GO:0006066 alcohol metabolic process; GO:0006082 organic acid metabolic process; GO:0006629 lipid metabolic process; GO:0006714 sesquiterpenoid metabolic process; GO:0006720 isoprenoid metabolic process; GO:0006721 terpenoid metabolic process; GO:0006950 response to stress; GO:0006970 response to osmotic stress; GO:0008152 metabolic process; GO:0008300 isopre…	GO:0005622 intracellular; GO:0005623 cell; GO:0005737 cytoplasm; GO:0005829 cytosol; GO:0016020 membrane; GO:0043226 organelle; GO:0043227 membrane-bounded organelle; GO:0043229 intracellular organelle; GO:0043231 intracellular membrane-bounded organelle; GO:0044424 intracellular part; GO:0044444 cytoplasmic part; GO:0044464 cell part;	GO:0003824 catalytic activity; GO:0008194 UDP-glycosyltransferase activity; GO:0010294 abscisic acid glucosyltransferase activity; GO:0016740 transferase activity; GO:0016757 transferase activity, transferring glycosyl groups; GO:0016758 transferase activity, transferring hexosyl groups; GO:0035251 UDP-glucosyltransferase activity; GO:0046527 glucosyltransferase activity; GO:0080043 quercetin 3-O…			CG	KOG1192	UDP-glucuronosyl and UDP-glucosyl transferase
O82772	AT3G03640	Probable inactive beta-glucosidase 25 OS=Arabidopsis thaliana OX=3702 GN=BGLU25 PE=2 SV=1	BGLU25	2.265	3.42763e-05	Up	59.8	23	13	24	13	0.604	0.636	0.608	1.295	1.444	1.447	vacuolar membrane	K01188	E3.2.1.21; beta-glucosidase [EC:3.2.1.21]	map00460 Cyanoamino acid metabolism; map00500 Starch and sucrose metabolism; map00940 Phenylpropanoid biosynthesis; map01100 Metabolic pathways; map01110 Biosynthesis of secondary metabolites	GO:0008152 metabolic process; GO:0071704 organic substance metabolic process; GO:1901135 carbohydrate derivative metabolic process; GO:1901657 glycosyl compound metabolic process;	GO:0005622 intracellular; GO:0005623 cell; GO:0005737 cytoplasm; GO:0005783 endoplasmic reticulum; GO:0012505 endomembrane system; GO:0043226 organelle; GO:0043227 membrane-bounded organelle; GO:0043229 intracellular organelle; GO:0043231 intracellular membrane-bounded organelle; GO:0044424 intracellular part; GO:0044444 cytoplasmic part; GO:0044464 cell part;	GO:0003824 catalytic activity; GO:0004553 hydrolase activity, hydrolyzing O-glycosyl compounds; GO:0008422 beta-glucosidase activity; GO:0015926 glucosidase activity; GO:0016787 hydrolase activity; GO:0016798 hydrolase activity, acting on glycosyl bonds;	PF00232	Glycosyl hydrolase family 1	G	KOG0626	Beta-glucosidase, lactase phlorizinhydrolase, and related proteins
P24806	AT4G30270	Xyloglucan endotransglucosylase/hydrolase protein 24 OS=Arabidopsis thaliana OX=3702 GN=XTH24 PE=1 SV=2	XTH24	1.514	0.00172112	Up	30.7	35	8	15	7	0.793	0.735	0.834	1.099	1.211	1.265	extracellular	K08235	E2.4.1.207; xyloglucan:xyloglucosyl transferase [EC:2.4.1.207]		GO:0005975 carbohydrate metabolic process; GO:0005976 polysaccharide metabolic process; GO:0006073 cellular glucan metabolic process; GO:0006950 response to stress; GO:0008152 metabolic process; GO:0008283 cell proliferation; GO:0009266 response to temperature stimulus; GO:0009408 response to heat; GO:0009409 response to cold; GO:0009605 response to external stimulus; GO:0009612 response to mecha…	GO:0005618 cell wall; GO:0005622 intracellular; GO:0005623 cell; GO:0005737 cytoplasm; GO:0005794 Golgi apparatus; GO:0005886 plasma membrane; GO:0009505 plant-type cell wall; GO:0012505 endomembrane system; GO:0016020 membrane; GO:0030312 external encapsulating structure; GO:0043226 organelle; GO:0043227 membrane-bounded organelle; GO:0043229 intracellular organelle; GO:0043231 intracellular mem…	GO:0003824 catalytic activity; GO:0016740 transferase activity; GO:0016757 transferase activity, transferring glycosyl groups; GO:0016758 transferase activity, transferring hexosyl groups; GO:0016762 xyloglucan:xyloglucosyl transferase activity; GO:0046527 glucosyltransferase activity;	PF00722	Glycosyl hydrolases family 16
P25070	AT5G37770	Calcium-binding protein CML24 OS=Arabidopsis thaliana OX=3702 GN=CML24 PE=2 SV=2	CML24	1.424	0.0451937	Up	17.5	4	1	1	1	0.879	0.831	0.766	1.011	1.066	1.448	cytoplasm	K13448	CML; calcium-binding protein CML	map04626 Plant-pathogen interaction	GO:0000003 reproduction; GO:0000302 response to reactive oxygen species; GO:0001101 response to acid chemical; GO:0001505 regulation of neurotransmitter levels; GO:0002376 immune system process; GO:0003006 developmental process involved in reproduction; GO:0006950 response to stress; GO:0006952 defense response; GO:0006955 immune response; GO:0006979 response to oxidative stress; GO:0007275 multi…	GO:0005623 cell; GO:0005886 plasma membrane; GO:0016020 membrane; GO:0044464 cell part; GO:0071944 cell periphery;	GO:0005488 binding; GO:0005509 calcium ion binding; GO:0043167 ion binding; GO:0043169 cation binding; GO:0046872 metal ion binding;	PF13499	EF-hand domain pair	T	KOG0027	Calmodulin and related proteins (EF-Hand superfamily)
P30187	AT2G41090	Calmodulin-like protein 10 OS=Arabidopsis thaliana OX=3702 GN=CML10 PE=2 SV=1	CML10	1.714	0.000438849	Up	21.7	15	3	5	3	0.763	0.662	0.772	1.27	1.226	1.269	cytoplasm	K02183	CALM; calmodulin	map04016 MAPK signaling pathway - plant; map04070 Phosphatidylinositol signaling system; map04626 Plant-pathogen interaction	GO:0006109 regulation of carbohydrate metabolic process; GO:0006950 response to stress; GO:0006979 response to oxidative stress; GO:0007154 cell communication; GO:0007165 signal transduction; GO:0009314 response to radiation; GO:0009416 response to light stimulus; GO:0009605 response to external stimulus; GO:0009606 tropism; GO:0009612 response to mechanical stimulus; GO:0009628 response to abiot…	GO:0005622 intracellular; GO:0005623 cell; GO:0005737 cytoplasm; GO:0005773 vacuole; GO:0005774 vacuolar membrane; GO:0005856 cytoskeleton; GO:0005874 microtubule; GO:0005911 cell-cell junction; GO:0009506 plasmodesma; GO:0015630 microtubule cytoskeleton; GO:0016020 membrane; GO:0030054 cell junction; GO:0031090 organelle membrane; GO:0043226 organelle; GO:0043227 membrane-bounded organelle; GO:0…	GO:0005488 binding; GO:0005509 calcium ion binding; GO:0043167 ion binding; GO:0043169 cation binding; GO:0046872 metal ion binding;	PF13499	EF-hand domain pair	T	KOG0027	Calmodulin and related proteins (EF-Hand superfamily)
P31169	AT5G15970	Stress-induced protein KIN2 OS=Arabidopsis thaliana OX=3702 GN=KIN2 PE=2 SV=1	KIN2	1.358	0.0439836	Up	6.5	23	1	1	1	0.821	0.873	0.85	0.938	1.207	1.311	mitochondria
Q0V842	AT5G61390	Protein NEN2 OS=Arabidopsis thaliana OX=3702 GN=NEN2 PE=2 SV=1	NEN2	1.396	0.00488511	Up	54.3	4	2	2	2	0.859	0.768	0.878	1.242	1.18	1.075	nucleus				GO:0006139 nucleobase-containing compound metabolic process; GO:0006725 cellular aromatic compound metabolic process; GO:0006807 nitrogen compound metabolic process; GO:0006950 response to stress; GO:0006974 cellular response to DNA damage stimulus; GO:0008152 metabolic process; GO:0009987 cellular process; GO:0033554 cellular response to stress; GO:0034641 cellular nitrogen compound metabolic pr…	GO:0005618 cell wall; GO:0005622 intracellular; GO:0005623 cell; GO:0005737 cytoplasm; GO:0005829 cytosol; GO:0005886 plasma membrane; GO:0009380 excinuclease repair complex; GO:0016020 membrane; GO:0030312 external encapsulating structure; GO:0032991 macromolecular complex; GO:0044424 intracellular part; GO:0044444 cytoplasmic part; GO:0044464 cell part; GO:0071944 cell periphery; GO:1902494 cat…	GO:0003824 catalytic activity; GO:0004518 nuclease activity; GO:0004527 exonuclease activity; GO:0008408 3'-5' exonuclease activity; GO:0016787 hydrolase activity; GO:0016788 hydrolase activity, acting on ester bonds;
Q38857	AT5G57560	Xyloglucan endotransglucosylase/hydrolase protein 22 OS=Arabidopsis thaliana OX=3702 GN=XTH22 PE=1 SV=1	XTH22	1.944	0.00207072	Up	32.1	18	4	5	3	0.721	0.683	0.626	1.108	1.393	1.446	extracellular	K14504	TCH4; xyloglucan:xyloglucosyl transferase TCH4 [EC:2.4.1.207]	map04075 Plant hormone signal transduction	GO:0005975 carbohydrate metabolic process; GO:0005976 polysaccharide metabolic process; GO:0006073 cellular glucan metabolic process; GO:0006950 response to stress; GO:0008152 metabolic process; GO:0008283 cell proliferation; GO:0009266 response to temperature stimulus; GO:0009408 response to heat; GO:0009409 response to cold; GO:0009605 response to external stimulus; GO:0009612 response to mecha…	GO:0005618 cell wall; GO:0005622 intracellular; GO:0005623 cell; GO:0005737 cytoplasm; GO:0005794 Golgi apparatus; GO:0005886 plasma membrane; GO:0009505 plant-type cell wall; GO:0012505 endomembrane system; GO:0016020 membrane; GO:0030312 external encapsulating structure; GO:0043226 organelle; GO:0043227 membrane-bounded organelle; GO:0043229 intracellular organelle; GO:0043231 intracellular mem…	GO:0003824 catalytic activity; GO:0016740 transferase activity; GO:0016757 transferase activity, transferring glycosyl groups; GO:0016758 transferase activity, transferring hexosyl groups; GO:0016762 xyloglucan:xyloglucosyl transferase activity; GO:0046527 glucosyltransferase activity;	PF00722	Glycosyl hydrolases family 16
Q38910	AT4G25810	Probable xyloglucan endotransglucosylase/hydrolase protein 23 OS=Arabidopsis thaliana OX=3702 GN=XTH23 PE=2 SV=1	XTH23	1.997	0.00244569	Up	32	7	2	2	2	0.689	0.652	0.661	1.086	1.414	1.498	extracellular	K08235	E2.4.1.207; xyloglucan:xyloglucosyl transferase [EC:2.4.1.207]		GO:0005975 carbohydrate metabolic process; GO:0005976 polysaccharide metabolic process; GO:0006073 cellular glucan metabolic process; GO:0006950 response to stress; GO:0008152 metabolic process; GO:0008283 cell proliferation; GO:0009266 response to temperature stimulus; GO:0009408 response to heat; GO:0009409 response to cold; GO:0009605 response to external stimulus; GO:0009612 response to mecha…	GO:0005618 cell wall; GO:0005622 intracellular; GO:0005623 cell; GO:0005737 cytoplasm; GO:0005794 Golgi apparatus; GO:0005886 plasma membrane; GO:0009505 plant-type cell wall; GO:0012505 endomembrane system; GO:0016020 membrane; GO:0030312 external encapsulating structure; GO:0043226 organelle; GO:0043227 membrane-bounded organelle; GO:0043229 intracellular organelle; GO:0043231 intracellular mem…	GO:0003824 catalytic activity; GO:0016740 transferase activity; GO:0016757 transferase activity, transferring glycosyl groups; GO:0016758 transferase activity, transferring hexosyl groups; GO:0016762 xyloglucan:xyloglucosyl transferase activity; GO:0046527 glucosyltransferase activity;	PF00722	Glycosyl hydrolases family 16
Q39219	AT3G22370	Ubiquinol oxidase 1a, mitochondrial OS=Arabidopsis thaliana OX=3702 GN=AOX1A PE=1 SV=2	AOX1A	1.341	0.000863264	Up	40	13	5	5	5	0.893	0.84	0.854	1.095	1.194	1.181	mitochondria	K17893	AOX1, AOX2; ubiquinol oxidase [EC:1.10.3.11]		GO:0006091 generation of precursor metabolites and energy; GO:0006950 response to stress; GO:0007154 cell communication; GO:0007165 signal transduction; GO:0008152 metabolic process; GO:0009060 aerobic respiration; GO:0009266 response to temperature stimulus; GO:0009409 response to cold; GO:0009628 response to abiotic stimulus; GO:0009987 cellular process; GO:0010230 alternative respiration; GO:0…	GO:0005622 intracellular; GO:0005623 cell; GO:0005737 cytoplasm; GO:0005739 mitochondrion; GO:0043226 organelle; GO:0043227 membrane-bounded organelle; GO:0043229 intracellular organelle; GO:0043231 intracellular membrane-bounded organelle; GO:0044424 intracellular part; GO:0044444 cytoplasmic part; GO:0044464 cell part;	GO:0003824 catalytic activity; GO:0009916 alternative oxidase activity; GO:0016491 oxidoreductase activity; GO:0016679 oxidoreductase activity, acting on diphenols and related substances as donors; GO:0016682 oxidoreductase activity, acting on diphenols and related substances as donors, oxygen as acceptor;
Q41906	AT2G40880	Cysteine proteinase inhibitor 3 OS=Arabidopsis thaliana OX=3702 GN=CYS3 PE=2 SV=2	CYS3	2.979	0.000130543	Up	14.4	17	2	6	2	0.49	0.502	0.516	1.287	1.618	1.587	extracellular				GO:0001101 response to acid chemical; GO:0006950 response to stress; GO:0006970 response to osmotic stress; GO:0006972 hyperosmotic response; GO:0006979 response to oxidative stress; GO:0009266 response to temperature stimulus; GO:0009409 response to cold; GO:0009414 response to water deprivation; GO:0009415 response to water; GO:0009628 response to abiotic stimulus; GO:0009892 negative regulatio…		GO:0002020 protease binding; GO:0004857 enzyme inhibitor activity; GO:0004866 endopeptidase inhibitor activity; GO:0004869 cysteine-type endopeptidase inhibitor activity; GO:0005488 binding; GO:0005515 protein binding; GO:0019899 enzyme binding; GO:0030234 enzyme regulator activity; GO:0030414 peptidase inhibitor activity; GO:0061134 peptidase regulator activity; GO:0061135 endopeptidase regulato…
Q42512	AT2G42540	Protein COLD-REGULATED 15A, chloroplastic OS=Arabidopsis thaliana OX=3702 GN=COR15A PE=1 SV=1	COR15A	1.436	0.00225941	Up	14.6	19	3	4	3	0.779	0.848	0.809	1.062	1.21	1.225	chloroplast	K08917	LHCB6; light-harvesting complex II chlorophyll a/b binding protein 6	map00196 Photosynthesis - antenna proteins; map01100 Metabolic pathways
Q501E6	AT5G25250	Flotillin-like protein 1 OS=Arabidopsis thaliana OX=3702 GN=FLOT1 PE=2 SV=1	FLOT1	1.652	0.000817754	Up	52.3	23	10	15	10	0.784	0.685	0.76	1.146	1.232	1.304	mitochondria	K07192	FLOT; flotillin		GO:0001666 response to hypoxia; GO:0006810 transport; GO:0006897 endocytosis; GO:0006950 response to stress; GO:0009628 response to abiotic stimulus; GO:0009987 cellular process; GO:0010324 membrane invagination; GO:0016043 cellular component organization; GO:0016192 vesicle-mediated transport; GO:0033554 cellular response to stress; GO:0036293 response to decreased oxygen levels; GO:0036294 cell…	GO:0005622 intracellular; GO:0005623 cell; GO:0005737 cytoplasm; GO:0005768 endosome; GO:0005773 vacuole; GO:0005774 vacuolar membrane; GO:0005886 plasma membrane; GO:0005911 cell-cell junction; GO:0009506 plasmodesma; GO:0012505 endomembrane system; GO:0016020 membrane; GO:0030054 cell junction; GO:0031090 organelle membrane; GO:0031410 cytoplasmic vesicle; GO:0031982 vesicle; GO:0043226 organel…				UZ	KOG2668	Flotillins
Q6DYE4	AT1G26090	Uncharacterized protein At1g26090, chloroplastic OS=Arabidopsis thaliana OX=3702 GN=At1g26090 PE=1 SV=1	At1g26090	1.338	0.0196022	Up	49.9	3	1	2	1	0.748	0.961	0.857	1.084	1.147	1.203	chloroplast					GO:0005622 intracellular; GO:0005623 cell; GO:0005737 cytoplasm; GO:0009507 chloroplast; GO:0009532 plastid stroma; GO:0009536 plastid; GO:0009570 chloroplast stroma; GO:0010287 plastoglobule; GO:0043226 organelle; GO:0043227 membrane-bounded organelle; GO:0043229 intracellular organelle; GO:0043231 intracellular membrane-bounded organelle; GO:0044422 organelle part; GO:0044424 intracellular part…		PF02374	Anion-transporting ATPase
Q6NNI8	AT1G12440	Zinc finger A20 and AN1 domain-containing stress-associated protein 1 OS=Arabidopsis thaliana OX=3702 GN=SAP1 PE=1 SV=1	SAP1	1.422	0.0323501	Up	17.8	5	1	1	1	0.82	0.897	0.76	0.964	1.237	1.322	chloroplast				GO:0002376 immune system process; GO:0006464 cellular protein modification process; GO:0006508 proteolysis; GO:0006511 ubiquitin-dependent protein catabolic process; GO:0006807 nitrogen compound metabolic process; GO:0006950 response to stress; GO:0006952 defense response; GO:0006955 immune response; GO:0008152 metabolic process; GO:0009056 catabolic process; GO:0009057 macromolecule catabolic pr…	GO:0005911 cell-cell junction; GO:0009506 plasmodesma; GO:0030054 cell junction; GO:0055044 symplast;	GO:0003824 catalytic activity; GO:0004842 ubiquitin-protein transferase activity; GO:0016740 transferase activity; GO:0019787 ubiquitin-like protein transferase activity; GO:0061630 ubiquitin protein ligase activity; GO:0061659 ubiquitin-like protein ligase activity;			S	KOG3173	Predicted Zn-finger protein
Q6NPF9	AT1G76760	Thioredoxin Y1, chloroplastic OS=Arabidopsis thaliana OX=3702 GN=At1g76760 PE=2 SV=1	At1g76760	1.317	0.0232467	Up	19.2	6	1	1	1	0.798	0.896	0.895	1.001	1.155	1.254	chloroplast				GO:0006950 response to stress; GO:0006979 response to oxidative stress; GO:0008152 metabolic process; GO:0009314 response to radiation; GO:0009416 response to light stimulus; GO:0009628 response to abiotic stimulus; GO:0009636 response to toxic substance; GO:0009987 cellular process; GO:0019725 cellular homeostasis; GO:0033554 cellular response to stress; GO:0034599 cellular response to oxidative…	GO:0005622 intracellular; GO:0005623 cell; GO:0005737 cytoplasm; GO:0009507 chloroplast; GO:0009532 plastid stroma; GO:0009536 plastid; GO:0009570 chloroplast stroma; GO:0043226 organelle; GO:0043227 membrane-bounded organelle; GO:0043229 intracellular organelle; GO:0043231 intracellular membrane-bounded organelle; GO:0044422 organelle part; GO:0044424 intracellular part; GO:0044434 chloroplast p…	GO:0003824 catalytic activity; GO:0004791 thioredoxin-disulfide reductase activity; GO:0008047 enzyme activator activity; GO:0015035 protein disulfide oxidoreductase activity; GO:0015036 disulfide oxidoreductase activity; GO:0016209 antioxidant activity; GO:0016491 oxidoreductase activity; GO:0016651 oxidoreductase activity, acting on NAD(P)H; GO:0016667 oxidoreductase activity, acting on a sulfu…	PF00085	Thioredoxin	O	KOG0910	Thioredoxin-like protein
Q6NPT8	AT2G02230	F-box protein PP2-B1 OS=Arabidopsis thaliana OX=3702 GN=PP2B1 PE=1 SV=1	PP2B1	2.47	3.68383e-05	Up	37.1	9	3	3	3	0.615	0.528	0.586	1.431	1.409	1.43	nucleus				GO:0000003 reproduction; GO:0003006 developmental process involved in reproduction; GO:0007275 multicellular organism development; GO:0009790 embryo development; GO:0009791 post-embryonic development; GO:0009793 embryo development ending in seed dormancy; GO:0010154 fruit development; GO:0022414 reproductive process; GO:0032501 multicellular organismal process; GO:0032502 developmental process; G…	GO:0005622 intracellular; GO:0005623 cell; GO:0005634 nucleus; GO:0043226 organelle; GO:0043227 membrane-bounded organelle; GO:0043229 intracellular organelle; GO:0043231 intracellular membrane-bounded organelle; GO:0044424 intracellular part; GO:0044464 cell part;	GO:0005488 binding; GO:0030246 carbohydrate binding;	PF00646	F-box domain
Q84K71	AT2G38330	Protein DETOXIFICATION 44, chloroplastic OS=Arabidopsis thaliana OX=3702 GN=DTX44 PE=2 SV=1	DTX44	1.305	0.0261689	Up	54.9	3	1	2	1	0.816	0.892	0.895	1.022	1.085	1.29	plasma membrane				GO:0006810 transport; GO:0006811 ion transport; GO:0006820 anion transport; GO:0006842 tricarboxylic acid transport; GO:0006855 drug transmembrane transport; GO:0010035 response to inorganic substance; GO:0010038 response to metal ion; GO:0010044 response to aluminum ion; GO:0015711 organic anion transport; GO:0015746 citrate transport; GO:0015849 organic acid transport; GO:0015893 drug transport…		GO:0005215 transporter activity; GO:0005342 organic acid transmembrane transporter activity; GO:0008509 anion transmembrane transporter activity; GO:0008514 organic anion transmembrane transporter activity; GO:0015075 ion transmembrane transporter activity; GO:0015137 citrate transmembrane transporter activity; GO:0015142 tricarboxylic acid transmembrane transporter activity; GO:0015238 drug tran…			V	KOG1347	Uncharacterized membrane protein, predicted efflux pump
Q8GWG0	AT5G60620	Glycerol-3-phosphate acyltransferase 9 OS=Arabidopsis thaliana OX=3702 GN=GPAT9 PE=1 SV=1	GPAT9	1.35	0.0243713	Up	43	10	2	2	2	0.785	0.961	0.808	1.088	1.075	1.284	cytoplasm	K13506	GPAT3_4, AGPAT9, AGPAT6; glycerol-3-phosphate O-acyltransferase 3/4 [EC:2.3.1.15]	map00561 Glycerolipid metabolism; map00564 Glycerophospholipid metabolism; map01100 Metabolic pathways; map01110 Biosynthesis of secondary metabolites	GO:0000003 reproduction; GO:0003006 developmental process involved in reproduction; GO:0006072 glycerol-3-phosphate metabolic process; GO:0006082 organic acid metabolic process; GO:0006629 lipid metabolic process; GO:0006631 fatty acid metabolic process; GO:0006633 fatty acid biosynthetic process; GO:0006638 neutral lipid metabolic process; GO:0006639 acylglycerol metabolic process; GO:0006641 tr…	GO:0005622 intracellular; GO:0005623 cell; GO:0005737 cytoplasm; GO:0005783 endoplasmic reticulum; GO:0005789 endoplasmic reticulum membrane; GO:0005886 plasma membrane; GO:0012505 endomembrane system; GO:0016020 membrane; GO:0031984 organelle subcompartment; GO:0042175 nuclear outer membrane-endoplasmic reticulum membrane network; GO:0043226 organelle; GO:0043227 membrane-bounded organelle; GO:0…	GO:0003824 catalytic activity; GO:0004366 glycerol-3-phosphate O-acyltransferase activity; GO:0005488 binding; GO:0005515 protein binding; GO:0008374 O-acyltransferase activity; GO:0016740 transferase activity; GO:0016746 transferase activity, transferring acyl groups; GO:0016747 transferase activity, transferring acyl groups other than amino-acyl groups; GO:0043621 protein self-association;			I	KOG2898	Predicted phosphate acyltransferase, contains PlsC domain
Q8GY17	AT4G38410	At4g38410 OS=Arabidopsis thaliana OX=3702 GN=At4g38410 PE=2 SV=1	At4g38410	1.377	0.00415716	Up	18.2	6	1	1	1	0.803	0.913	0.809	1.094	1.148	1.234	nucleus
Q8GYJ7	AT1G24340	FAD/NAD(P)-binding oxidoreductase family protein OS=Arabidopsis thaliana OX=3702 GN=EMB2421 PE=2 SV=1	EMB2421	1.405	0.0269786	Up	78.3	3	2	2	2	0.808	0.949	0.738	1.017	1.226	1.262	chloroplast									CH	KOG3855	Monooxygenase involved in coenzyme Q (ubiquinone) biosynthesis
Q8GYM1	AT1G78340	Glutathione S-transferase U22 OS=Arabidopsis thaliana OX=3702 GN=GSTU22 PE=1 SV=1	GSTU22	1.51	0.00496117	Up	25.3	21	4	6	4	0.699	0.874	0.817	1.128	1.262	1.218	cytoplasm	K00799	GST, gst; glutathione S-transferase [EC:2.5.1.18]	map00480 Glutathione metabolism; map01100 Metabolic pathways	GO:0001101 response to acid chemical; GO:0006518 peptide metabolic process; GO:0006575 cellular modified amino acid metabolic process; GO:0006725 cellular aromatic compound metabolic process; GO:0006749 glutathione metabolic process; GO:0006790 sulfur compound metabolic process; GO:0006807 nitrogen compound metabolic process; GO:0006950 response to stress; GO:0006979 response to oxidative stress;…	GO:0005576 extracellular region; GO:0005622 intracellular; GO:0005623 cell; GO:0005634 nucleus; GO:0005737 cytoplasm; GO:0005773 vacuole; GO:0005774 vacuolar membrane; GO:0005829 cytosol; GO:0005886 plasma membrane; GO:0009507 chloroplast; GO:0009532 plastid stroma; GO:0009536 plastid; GO:0009570 chloroplast stroma; GO:0016020 membrane; GO:0031090 organelle membrane; GO:0043226 organelle; GO:0043…	GO:0003824 catalytic activity; GO:0004364 glutathione transferase activity; GO:0005488 binding; GO:0005515 protein binding; GO:0016740 transferase activity; GO:0016765 transferase activity, transferring alkyl or aryl (other than methyl) groups; GO:0019899 enzyme binding; GO:0033218 amide binding; GO:0042277 peptide binding; GO:0043167 ion binding; GO:0043168 anion binding; GO:0043295 glutathione …	PF02798; PF13410	Glutathione S-transferase, N-terminal domain; Glutathione S-transferase, C-terminal domain	O	KOG0406	Glutathione S-transferase
Q8H113	AT3G49620	Probable 2-oxoglutarate-dependent dioxygenase DIN11 OS=Arabidopsis thaliana OX=3702 GN=DIN11 PE=2 SV=1	DIN11	1.808	0.0251867	Up	40.7	7	2	2	2	0.872	0.491	0.774	1.221	1.361	1.281	cytoplasm				GO:0006950 response to stress; GO:0007154 cell communication; GO:0009267 cellular response to starvation; GO:0009605 response to external stimulus; GO:0009987 cellular process; GO:0009991 response to extracellular stimulus; GO:0031667 response to nutrient levels; GO:0031668 cellular response to extracellular stimulus; GO:0031669 cellular response to nutrient levels; GO:0033554 cellular response t…			PF03171	2OG-Fe(II) oxygenase superfamily	Q	KOG0143	Iron/ascorbate family oxidoreductases
Q8L3S7	AT3G57785	ESSS subunit of NADH:ubiquinone oxidoreductase (Complex I) protein OS=Arabidopsis thaliana OX=3702 GN=At3g57785 PE=2 SV=1	At3g57785	1.36	0.0167744	Up	12.7	10	1	3	1	0.795	0.845	0.903	1.058	1.088	1.312	chloroplast
Q8L7I4	AT1G78200	Probable protein phosphatase 2C 17 OS=Arabidopsis thaliana OX=3702 GN=At1g78200 PE=2 SV=1	At1g78200	1.343	0.00530298	Up	30.8	4	1	1	1	0.872	0.882	0.807	1.212	1.046	1.181	chloroplast	K17506	PPM1L, PP2CE; protein phosphatase 1L [EC:3.1.3.16]			GO:0005623 cell; GO:0005886 plasma membrane; GO:0016020 membrane; GO:0044464 cell part; GO:0071944 cell periphery;				T	KOG0698	Serine/threonine protein phosphatase
Q8L7Z6	AT3G54680	AT3g54680/T5N23_40 OS=Arabidopsis thaliana OX=3702 GN=At3g54680 PE=2 SV=1	At3g54680	1.473	0.00600478	Up	22.7	9	1	2	1	0.863	0.727	0.836	1.076	1.267	1.231	nucleus
Q8RXH9	AT5G58005	AT5G58005 protein OS=Arabidopsis thaliana OX=3702 GN=At5g58005 PE=2 SV=1	At5g58005	1.395	0.0259325	Up	13.3	7	1	1	1	0.835	0.854	0.816	0.959	1.261	1.274	chloroplast	K18179	COA6; cytochrome c oxidase assembly factor 6					PF02297	Cytochrome oxidase c subunit VIb
Q8RXL7	AT2G44080	ARGOS-like protein OS=Arabidopsis thaliana OX=3702 GN=ARL PE=2 SV=1	ARL	1.983	0.00179595	Up	15	14	2	2	2	0.624	0.709	0.678	1.132	1.343	1.512	cytoplasm				GO:0009719 response to endogenous stimulus; GO:0009723 response to ethylene; GO:0009725 response to hormone; GO:0009733 response to auxin; GO:0009741 response to brassinosteroid; GO:0009825 multidimensional cell growth; GO:0009987 cellular process; GO:0010033 response to organic substance; GO:0014070 response to organic cyclic compound; GO:0016049 cell growth; GO:0032501 multicellular organismal …	GO:0005622 intracellular; GO:0005623 cell; GO:0005634 nucleus; GO:0005737 cytoplasm; GO:0005783 endoplasmic reticulum; GO:0012505 endomembrane system; GO:0016020 membrane; GO:0043226 organelle; GO:0043227 membrane-bounded organelle; GO:0043229 intracellular organelle; GO:0043231 intracellular membrane-bounded organelle; GO:0044424 intracellular part; GO:0044444 cytoplasmic part; GO:0044464 cell p…
Q8RXN8	AT5G42050	DCD (Development and Cell Death) domain protein OS=Arabidopsis thaliana OX=3702 GN=MJC20.15 PE=2 SV=1	MJC20.15	1.935	0.000480226	Up	39.8	12	3	4	3	0.628	0.696	0.714	1.189	1.358	1.397	nucleus							PF10539	Development and cell death domain
Q8S8Q6	AT2G23810	Tetraspanin-8 OS=Arabidopsis thaliana OX=3702 GN=TET8 PE=2 SV=1	TET8	1.358	0.015723	Up	30.6	10	3	5	3	0.874	0.824	0.839	0.988	1.232	1.225	plasma membrane				GO:0006950 response to stress; GO:0006952 defense response; GO:0009605 response to external stimulus; GO:0009607 response to biotic stimulus; GO:0009617 response to bacterium; GO:0042742 defense response to bacterium; GO:0043207 response to external biotic stimulus; GO:0050829 defense response to Gram-negative bacterium; GO:0050896 response to stimulus; GO:0051704 multi-organism process; GO:00517…	GO:0005622 intracellular; GO:0005623 cell; GO:0005737 cytoplasm; GO:0005794 Golgi apparatus; GO:0005886 plasma membrane; GO:0005911 cell-cell junction; GO:0009506 plasmodesma; GO:0012505 endomembrane system; GO:0016020 membrane; GO:0030054 cell junction; GO:0043226 organelle; GO:0043227 membrane-bounded organelle; GO:0043229 intracellular organelle; GO:0043231 intracellular membrane-bounded organ…
Q8VYV3	AT1G31940	At1g31940/F5M6.6 OS=Arabidopsis thaliana OX=3702 GN=At1g31940 PE=2 SV=1	At1g31940	1.342	0.00626035	Up	17.1	14	1	2	1	0.881	0.767	0.914	1.105	1.162	1.171	mitochondria
Q8W491	AT4G34131	UDP-glycosyltransferase 73B3 OS=Arabidopsis thaliana OX=3702 GN=UGT73B3 PE=2 SV=1	UGT73B3	1.647	0.000150704	Up	54.6	2	1	1	1	0.752	0.721	0.794	1.275	1.268	1.19	chloroplast	K23260	TOGT1; scopoletin glucosyltransferase [EC:2.4.1.128]	map00940 Phenylpropanoid biosynthesis; map01110 Biosynthesis of secondary metabolites	GO:0008152 metabolic process; GO:0009058 biosynthetic process; GO:0009605 response to external stimulus; GO:0009607 response to biotic stimulus; GO:0009812 flavonoid metabolic process; GO:0009813 flavonoid biosynthetic process; GO:0042440 pigment metabolic process; GO:0043207 response to external biotic stimulus; GO:0046148 pigment biosynthetic process; GO:0050896 response to stimulus; GO:0051552…	GO:0005622 intracellular; GO:0005623 cell; GO:0005737 cytoplasm; GO:0005829 cytosol; GO:0043226 organelle; GO:0043227 membrane-bounded organelle; GO:0043229 intracellular organelle; GO:0043231 intracellular membrane-bounded organelle; GO:0044424 intracellular part; GO:0044444 cytoplasmic part; GO:0044464 cell part;	GO:0003824 catalytic activity; GO:0008194 UDP-glycosyltransferase activity; GO:0016740 transferase activity; GO:0016757 transferase activity, transferring glycosyl groups; GO:0016758 transferase activity, transferring hexosyl groups; GO:0035251 UDP-glucosyltransferase activity; GO:0046527 glucosyltransferase activity; GO:0047893 flavonol 3-O-glucosyltransferase activity; GO:0080043 quercetin 3-O-…			CG	KOG1192	UDP-glucuronosyl and UDP-glucosyl transferase
Q93W32	AT3G11700	Fasciclin-like arabinogalactan protein 18 OS=Arabidopsis thaliana OX=3702 GN=FLA18 PE=2 SV=1	FLA18	1.418	0.0182271	Up	50.8	3	1	1	1	0.811	0.829	0.842	0.978	1.244	1.297	cytoplasm					GO:0005622 intracellular; GO:0005623 cell; GO:0005737 cytoplasm; GO:0005773 vacuole; GO:0043226 organelle; GO:0043227 membrane-bounded organelle; GO:0043229 intracellular organelle; GO:0043231 intracellular membrane-bounded organelle; GO:0044424 intracellular part; GO:0044444 cytoplasmic part; GO:0044464 cell part;		PF02469	Fasciclin domain	MW	KOG1437	Fasciclin and related adhesion glycoproteins
Q949S5	AT1G80110	F-box protein PP2-B11 OS=Arabidopsis thaliana OX=3702 GN=PP2B11 PE=1 SV=1	PP2B11	1.487	0.00628362	Up	29	5	1	1	1	0.824	0.803	0.785	1.193	1.046	1.348	nucleus				GO:0000003 reproduction; GO:0003006 developmental process involved in reproduction; GO:0007275 multicellular organism development; GO:0009790 embryo development; GO:0009791 post-embryonic development; GO:0009793 embryo development ending in seed dormancy; GO:0010154 fruit development; GO:0022414 reproductive process; GO:0032501 multicellular organismal process; GO:0032502 developmental process; G…	GO:0005622 intracellular; GO:0005623 cell; GO:0005634 nucleus; GO:0043226 organelle; GO:0043227 membrane-bounded organelle; GO:0043229 intracellular organelle; GO:0043231 intracellular membrane-bounded organelle; GO:0044424 intracellular part; GO:0044464 cell part;	GO:0005488 binding; GO:0030246 carbohydrate binding;	PF00646	F-box domain
Q9C7G4	AT1G72010	Transcription factor TCP22 OS=Arabidopsis thaliana OX=3702 GN=TCP22 PE=2 SV=1	TCP22	1.324	0.0475676	Up	39.6	3	1	2	1	0.925	0.789	0.867	0.98	1.119	1.319	nucleus				GO:0006355 regulation of transcription, DNA-templated; GO:0009889 regulation of biosynthetic process; GO:0010468 regulation of gene expression; GO:0010556 regulation of macromolecule biosynthetic process; GO:0019219 regulation of nucleobase-containing compound metabolic process; GO:0019222 regulation of metabolic process; GO:0031323 regulation of cellular metabolic process; GO:0031326 regulation …	GO:0005622 intracellular; GO:0005623 cell; GO:0005634 nucleus; GO:0043226 organelle; GO:0043227 membrane-bounded organelle; GO:0043229 intracellular organelle; GO:0043231 intracellular membrane-bounded organelle; GO:0044424 intracellular part; GO:0044464 cell part;	GO:0003700 transcription factor activity, sequence-specific DNA binding;
Q9C8T3	AT1G63290	Ribulose-phosphate 3-epimerase OS=Arabidopsis thaliana OX=3702 GN=At1g63290 PE=2 SV=1	At1g63290	1.358	0.0251708	Up	24.1	4	1	1	1	0.807	0.906	0.832	0.99	1.166	1.299	cytoplasm	K01783	rpe, RPE; ribulose-phosphate 3-epimerase [EC:5.1.3.1]	map00030 Pentose phosphate pathway; map00040 Pentose and glucuronate interconversions; map00710 Carbon fixation in photosynthetic organisms; map01100 Metabolic pathways; map01110 Biosynthesis of secondary metabolites; map01200 Carbon metabolism; map01230 Biosynthesis of amino acids	GO:0005975 carbohydrate metabolic process; GO:0005996 monosaccharide metabolic process; GO:0006081 cellular aldehyde metabolic process; GO:0006098 pentose-phosphate shunt; GO:0006139 nucleobase-containing compound metabolic process; GO:0006725 cellular aromatic compound metabolic process; GO:0006732 coenzyme metabolic process; GO:0006733 oxidoreduction coenzyme metabolic process; GO:0006739 NADP …	GO:0005622 intracellular; GO:0005623 cell; GO:0005737 cytoplasm; GO:0005829 cytosol; GO:0044424 intracellular part; GO:0044444 cytoplasmic part; GO:0044464 cell part;	GO:0003824 catalytic activity; GO:0004750 ribulose-phosphate 3-epimerase activity; GO:0005488 binding; GO:0016853 isomerase activity; GO:0016854 racemase and epimerase activity; GO:0016857 racemase and epimerase activity, acting on carbohydrates and derivatives; GO:0043167 ion binding; GO:0043169 cation binding; GO:0046872 metal ion binding;	PF00834	Ribulose-phosphate 3 epimerase family	G	KOG3111	D-ribulose-5-phosphate 3-epimerase
Q9FFH6	AT5G44130	Fasciclin-like arabinogalactan protein 13 OS=Arabidopsis thaliana OX=3702 GN=FLA13 PE=1 SV=1	FLA13	1.414	0.00270445	Up	26.2	15	3	4	3	0.833	0.808	0.861	1.171	1.084	1.283	plasma membrane					GO:0005618 cell wall; GO:0005622 intracellular; GO:0005623 cell; GO:0005737 cytoplasm; GO:0005794 Golgi apparatus; GO:0005886 plasma membrane; GO:0005911 cell-cell junction; GO:0009505 plant-type cell wall; GO:0009506 plasmodesma; GO:0012505 endomembrane system; GO:0016020 membrane; GO:0030054 cell junction; GO:0030312 external encapsulating structure; GO:0031224 intrinsic component of membrane; …		PF02469	Fasciclin domain
Q9FGT8	AT5G58070	Temperature-induced lipocalin-1 OS=Arabidopsis thaliana OX=3702 GN=TIL PE=1 SV=1	TIL	1.414	0.00608674	Up	21.4	16	3	6	3	0.838	0.832	0.815	1.027	1.259	1.227	nucleus	K03098	APOD; apolipoprotein D and lipocalin family protein		GO:0000003 reproduction; GO:0001101 response to acid chemical; GO:0003006 developmental process involved in reproduction; GO:0006873 cellular ion homeostasis; GO:0006875 cellular metal ion homeostasis; GO:0006883 cellular sodium ion homeostasis; GO:0006950 response to stress; GO:0006970 response to osmotic stress; GO:0006972 hyperosmotic response; GO:0007275 multicellular organism development; GO…	GO:0005622 intracellular; GO:0005623 cell; GO:0005737 cytoplasm; GO:0005739 mitochondrion; GO:0005773 vacuole; GO:0005774 vacuolar membrane; GO:0005783 endoplasmic reticulum; GO:0005794 Golgi apparatus; GO:0005886 plasma membrane; GO:0005911 cell-cell junction; GO:0009506 plasmodesma; GO:0009507 chloroplast; GO:0009526 plastid envelope; GO:0009536 plastid; GO:0009898 cytoplasmic side of plasma me…		PF08212	Lipocalin-like domain	M	KOG4824	Apolipoprotein D/Lipocalin
Q9FHW0	AT5G37070	At5g37070 OS=Arabidopsis thaliana OX=3702 GN=MJG14.7 PE=2 SV=1	MJG14.7	1.48	0.00556056	Up	18.9	20	2	3	2	0.743	0.766	0.91	1.158	1.28	1.142	nucleus
Q9FIJ4	AT5G47870	DNA repair RAD52-like protein 2, chloroplastic OS=Arabidopsis thaliana OX=3702 GN=RAD52-2 PE=1 SV=1	RAD52-2	1.4	0.0363776	Up	21.4	14	1	1	1	0.9	0.709	0.891	1.016	1.322	1.163	chloroplast				GO:0000724 double-strand break repair via homologous recombination; GO:0000725 recombinational repair; GO:0006139 nucleobase-containing compound metabolic process; GO:0006259 DNA metabolic process; GO:0006281 DNA repair; GO:0006302 double-strand break repair; GO:0006310 DNA recombination; GO:0006725 cellular aromatic compound metabolic process; GO:0006807 nitrogen compound metabolic process; GO:0…	GO:0005622 intracellular; GO:0005623 cell; GO:0005737 cytoplasm; GO:0009507 chloroplast; GO:0009536 plastid; GO:0043226 organelle; GO:0043227 membrane-bounded organelle; GO:0043229 intracellular organelle; GO:0043231 intracellular membrane-bounded organelle; GO:0044424 intracellular part; GO:0044444 cytoplasmic part; GO:0044464 cell part;
Q9FIV0	AT5G54540	AT5g54540/MRB17_4 OS=Arabidopsis thaliana OX=3702 GN=MRB17.4 PE=2 SV=1	MRB17.4	1.398	0.00583185	Up	31.8	8	2	3	2	0.863	0.867	0.772	1.1	1.114	1.283	chloroplast
Q9FN75	AT5G17760	AAA-ATPase At5g17760 OS=Arabidopsis thaliana OX=3702 GN=At5g17760 PE=3 SV=1	At5g17760	2.053	0.00247112	Up	57.4	15	6	7	4	0.68	0.642	0.669	1.633	1.307	1.147	chloroplast				GO:0006810 transport; GO:0008104 protein localization; GO:0009987 cellular process; GO:0015031 protein transport; GO:0015833 peptide transport; GO:0016043 cellular component organization; GO:0022607 cellular component assembly; GO:0033036 macromolecule localization; GO:0034622 cellular macromolecular complex assembly; GO:0042886 amide transport; GO:0043933 macromolecular complex subunit organizat…	GO:0005622 intracellular; GO:0005623 cell; GO:0005737 cytoplasm; GO:0005739 mitochondrion; GO:0005886 plasma membrane; GO:0016020 membrane; GO:0043226 organelle; GO:0043227 membrane-bounded organelle; GO:0043229 intracellular organelle; GO:0043231 intracellular membrane-bounded organelle; GO:0044424 intracellular part; GO:0044444 cytoplasmic part; GO:0044464 cell part; GO:0071944 cell periphery;	GO:0005215 transporter activity; GO:0008320 protein transmembrane transporter activity; GO:0008565 protein transporter activity; GO:0022857 transmembrane transporter activity; GO:0022884 macromolecule transmembrane transporter activity; GO:0042887 amide transmembrane transporter activity; GO:1904680 peptide transmembrane transporter activity;	PF00004	ATPase family associated with various cellular activities (AAA)	O	KOG0743	AAA+-type ATPase
Q9FNH6	AT5G06320	NDR1/HIN1-like protein 3 OS=Arabidopsis thaliana OX=3702 GN=NHL3 PE=1 SV=1	NHL3	1.381	0.0023247	Up	25.9	17	3	5	3	0.835	0.795	0.874	1.073	1.222	1.162	cytoplasm				GO:0001101 response to acid chemical; GO:0002252 immune effector process; GO:0002376 immune system process; GO:0006950 response to stress; GO:0006952 defense response; GO:0006955 immune response; GO:0009605 response to external stimulus; GO:0009607 response to biotic stimulus; GO:0009611 response to wounding; GO:0009615 response to virus; GO:0009617 response to bacterium; GO:0009719 response to e…	GO:0005622 intracellular; GO:0005623 cell; GO:0005737 cytoplasm; GO:0005773 vacuole; GO:0005774 vacuolar membrane; GO:0005794 Golgi apparatus; GO:0005886 plasma membrane; GO:0005911 cell-cell junction; GO:0009506 plasmodesma; GO:0012505 endomembrane system; GO:0016020 membrane; GO:0030054 cell junction; GO:0031090 organelle membrane; GO:0031224 intrinsic component of membrane; GO:0031225 anchored…		PF03168	Late embryogenesis abundant protein
Q9FNK3	AT5G46190	RNA-binding KH domain-containing protein OS=Arabidopsis thaliana OX=3702 GN=MCL19.25 PE=2 SV=1	MCL19.25	1.325	0.0259888	Up	69.6	2	1	1	1	0.772	0.915	0.894	1.083	1.282	1.054	nucleus	K21444	PCBP3_4; poly(rC)-binding protein 3/4					PF00013	KH domain	A	KOG2190	PolyC-binding proteins alphaCP-1 and related KH domain proteins
Q9FNP9	AT5G61160	Agmatine coumaroyltransferase OS=Arabidopsis thaliana OX=3702 GN=ACT PE=1 SV=1	ACT	1.646	0.00327897	Up	51	14	7	10	7	0.824	0.716	0.712	1.089	1.343	1.274	chloroplast	K14329	ACT; agmatine coumaroyltransferase [EC:2.3.1.64 2.3.1.-]	map00330 Arginine and proline metabolism; map01100 Metabolic pathways	GO:0008152 metabolic process; GO:0009058 biosynthetic process; GO:0009718 anthocyanin-containing compound biosynthetic process; GO:0009812 flavonoid metabolic process; GO:0009813 flavonoid biosynthetic process; GO:0042440 pigment metabolic process; GO:0046148 pigment biosynthetic process; GO:0046283 anthocyanin-containing compound metabolic process; GO:0071704 organic substance metabolic process;…	GO:0005622 intracellular; GO:0005623 cell; GO:0005737 cytoplasm; GO:0005829 cytosol; GO:0044424 intracellular part; GO:0044444 cytoplasmic part; GO:0044464 cell part;	GO:0003824 catalytic activity; GO:0008374 O-acyltransferase activity; GO:0016420 malonyltransferase activity; GO:0016740 transferase activity; GO:0016746 transferase activity, transferring acyl groups; GO:0016747 transferase activity, transferring acyl groups other than amino-acyl groups; GO:0047634 agmatine N4-coumaroyltransferase activity; GO:0050736 O-malonyltransferase activity;
Q9FWW9	AT1G12200	Flavin-containing monooxygenase FMO GS-OX-like 2 OS=Arabidopsis thaliana OX=3702 GN=At1g12200 PE=2 SV=1	At1g12200	1.358	0.0371557	Up	52.9	5	2	2	2	0.804	1.015	0.726	1.212	1.12	1.123	cytoplasm	K22324	GS-OX; aliphatic glucosinolate S-oxygenase [EC:1.14.13.237]		GO:0000096 sulfur amino acid metabolic process; GO:0001101 response to acid chemical; GO:0006082 organic acid metabolic process; GO:0006139 nucleobase-containing compound metabolic process; GO:0006163 purine nucleotide metabolic process; GO:0006164 purine nucleotide biosynthetic process; GO:0006182 cGMP biosynthetic process; GO:0006520 cellular amino acid metabolic process; GO:0006725 cellular ar…	GO:0005622 intracellular; GO:0005623 cell; GO:0005737 cytoplasm; GO:0005773 vacuole; GO:0043226 organelle; GO:0043227 membrane-bounded organelle; GO:0043229 intracellular organelle; GO:0043231 intracellular membrane-bounded organelle; GO:0044424 intracellular part; GO:0044444 cytoplasmic part; GO:0044464 cell part;	GO:0003824 catalytic activity; GO:0004383 guanylate cyclase activity; GO:0004497 monooxygenase activity; GO:0004499 N,N-dimethylaniline monooxygenase activity; GO:0005488 binding; GO:0008144 drug binding; GO:0009975 cyclase activity; GO:0016491 oxidoreductase activity; GO:0016705 oxidoreductase activity, acting on paired donors, with incorporation or reduction of molecular oxygen; GO:0016709 oxid…			Q	KOG1399	Flavin-containing monooxygenase
Q9FX85	AT1G49570	Peroxidase 10 OS=Arabidopsis thaliana OX=3702 GN=PER10 PE=1 SV=1	PER10	1.353	0.00128031	Up	38	7	2	2	2	0.856	0.802	0.892	1.103	1.183	1.165	chloroplast	K00430	E1.11.1.7; peroxidase [EC:1.11.1.7]	map00940 Phenylpropanoid biosynthesis; map01100 Metabolic pathways; map01110 Biosynthesis of secondary metabolites				PF00141	Peroxidase
Q9FXH5	AT1G19770	Purine permease 14 OS=Arabidopsis thaliana OX=3702 GN=PUP14 PE=1 SV=1	PUP14	1.411	0.00541453	Up	44	2	1	1	1	0.806	0.841	0.842	1.038	1.202	1.272	plasma membrane
Q9LD45	AT5G47120	Bax inhibitor 1 OS=Arabidopsis thaliana OX=3702 GN=BI-1 PE=1 SV=1	BI-1	1.309	0.0204541	Up	27.5	3	1	1	1	0.858	0.814	0.926	1.003	1.168	1.23	plasma membrane	K21889	TMBIM6, BI1, TEGT; Bax inhibitor 1		GO:0000038 very long-chain fatty acid metabolic process; GO:0001101 response to acid chemical; GO:0006082 organic acid metabolic process; GO:0006629 lipid metabolic process; GO:0006631 fatty acid metabolic process; GO:0006950 response to stress; GO:0006983 ER overload response; GO:0006984 ER-nucleus signaling pathway; GO:0007154 cell communication; GO:0007165 signal transduction; GO:0008152 metab…	GO:0005622 intracellular; GO:0005623 cell; GO:0005634 nucleus; GO:0005635 nuclear envelope; GO:0005737 cytoplasm; GO:0005783 endoplasmic reticulum; GO:0012505 endomembrane system; GO:0031967 organelle envelope; GO:0031975 envelope; GO:0043226 organelle; GO:0043227 membrane-bounded organelle; GO:0043229 intracellular organelle; GO:0043231 intracellular membrane-bounded organelle; GO:0044422 organe…				V	KOG1629	Bax-mediated apoptosis inhibitor TEGT/BI-1
Q9LFD2	AT5G01040	Laccase-8 OS=Arabidopsis thaliana OX=3702 GN=LAC8 PE=2 SV=1	LAC8	2.076	0.00419582	Up	65.2	1	1	1	1	0.54	0.659	0.752	1.145	1.437	1.468	chloroplast	K05909	E1.10.3.2; laccase [EC:1.10.3.2]		GO:0000003 reproduction; GO:0003006 developmental process involved in reproduction; GO:0007275 multicellular organism development; GO:0008152 metabolic process; GO:0009791 post-embryonic development; GO:0010035 response to inorganic substance; GO:0010038 response to metal ion; GO:0010228 vegetative to reproductive phase transition of meristem; GO:0022414 reproductive process; GO:0032501 multicell…		GO:0003824 catalytic activity; GO:0016491 oxidoreductase activity; GO:0016722 oxidoreductase activity, oxidizing metal ions;	PF07732; PF00394; PF07731	Multicopper oxidase; Multicopper oxidase; Multicopper oxidase	Q	KOG1263	Multicopper oxidases
Q9LFS3	AT5G16010	3-oxo-5-alpha-steroid 4-dehydrogenase family protein OS=Arabidopsis thaliana OX=3702 GN=At5g16010 PE=2 SV=1	At5g16010	1.436	0.00251549	Up	30.1	8	2	4	2	0.804	0.831	0.828	1.068	1.191	1.278	chloroplast	K10258	TER, TSC13, CER10; very-long-chain enoyl-CoA reductase [EC:1.3.1.93]	map00062 Fatty acid elongation; map01040 Biosynthesis of unsaturated fatty acids; map01100 Metabolic pathways; map01110 Biosynthesis of secondary metabolites; map01212 Fatty acid metabolism	GO:0000003 reproduction; GO:0003006 developmental process involved in reproduction; GO:0006629 lipid metabolic process; GO:0006694 steroid biosynthetic process; GO:0006702 androgen biosynthetic process; GO:0007154 cell communication; GO:0007267 cell-cell signaling; GO:0007275 multicellular organism development; GO:0007548 sex differentiation; GO:0008152 metabolic process; GO:0008202 steroid metab…	GO:0005622 intracellular; GO:0005623 cell; GO:0005737 cytoplasm; GO:0005783 endoplasmic reticulum; GO:0005789 endoplasmic reticulum membrane; GO:0012505 endomembrane system; GO:0016020 membrane; GO:0031984 organelle subcompartment; GO:0042175 nuclear outer membrane-endoplasmic reticulum membrane network; GO:0043226 organelle; GO:0043227 membrane-bounded organelle; GO:0043229 intracellular organel…	GO:0003824 catalytic activity; GO:0003865 3-oxo-5-alpha-steroid 4-dehydrogenase activity; GO:0009917 sterol 5-alpha reductase activity; GO:0016229 steroid dehydrogenase activity; GO:0016491 oxidoreductase activity; GO:0016614 oxidoreductase activity, acting on CH-OH group of donors; GO:0016616 oxidoreductase activity, acting on the CH-OH group of donors, NAD or NADP as acceptor; GO:0016627 oxidor…			I	KOG1638	Steroid reductase
Q9LFT3	AT5G15870	Glycosyl hydrolase family 81 protein OS=Arabidopsis thaliana OX=3702 GN=At5g15870 PE=4 SV=1	At5g15870	1.365	3.64263e-05	Up	82.8	7	5	9	5	0.874	0.853	0.854	1.163	1.154	1.205	chloroplast	K01180	E3.2.1.6; endo-1,3(4)-beta-glucanase [EC:3.2.1.6]		GO:0000003 reproduction; GO:0000272 polysaccharide catabolic process; GO:0000746 conjugation; GO:0000747 conjugation with cellular fusion; GO:0000920 cell separation after cytokinesis; GO:0005975 carbohydrate metabolic process; GO:0005976 polysaccharide metabolic process; GO:0006073 cellular glucan metabolic process; GO:0006074 (1->3)-beta-D-glucan metabolic process; GO:0006076 (1->3)-beta-D-gluc…	GO:0000935 barrier septum; GO:0000936 primary cell septum; GO:0005622 intracellular; GO:0005623 cell; GO:0005856 cytoskeleton; GO:0005937 mating projection; GO:0009986 cell surface; GO:0015629 actin cytoskeleton; GO:0030427 site of polarized growth; GO:0030428 cell septum; GO:0032153 cell division site; GO:0032155 cell division site part; GO:0042995 cell projection; GO:0043187 cell septum surface…	GO:0001871 pattern binding; GO:0003824 catalytic activity; GO:0004553 hydrolase activity, hydrolyzing O-glycosyl compounds; GO:0005488 binding; GO:0008422 beta-glucosidase activity; GO:0015926 glucosidase activity; GO:0016787 hydrolase activity; GO:0016798 hydrolase activity, acting on glycosyl bonds; GO:0030246 carbohydrate binding; GO:0030247 polysaccharide binding; GO:0042973 glucan endo-1,3-b…	PF03639	Glycosyl hydrolase family 81	G	KOG2254	Predicted endo-1,3-beta-glucanase
Q9LFT6	AT5G10300	Alpha-hydroxynitrile lyase OS=Arabidopsis thaliana OX=3702 GN=HNL PE=1 SV=1	HNL	1.315	0.018871	Up	29.2	9	2	2	2	0.978	0.805	0.808	1.063	1.154	1.191	chloroplast	K20802	HNL; (R)-mandelonitrile lyase [EC:4.1.2.10]	map00460 Cyanoamino acid metabolism; map01100 Metabolic pathways; map01110 Biosynthesis of secondary metabolites	GO:0002376 immune system process; GO:0006082 organic acid metabolic process; GO:0006725 cellular aromatic compound metabolic process; GO:0006950 response to stress; GO:0006952 defense response; GO:0006955 immune response; GO:0008152 metabolic process; GO:0009056 catabolic process; GO:0009605 response to external stimulus; GO:0009607 response to biotic stimulus; GO:0009611 response to wounding; GO…		GO:0003824 catalytic activity; GO:0016787 hydrolase activity; GO:0016788 hydrolase activity, acting on ester bonds; GO:0016829 lyase activity; GO:0016830 carbon-carbon lyase activity; GO:0016832 aldehyde-lyase activity; GO:0046593 mandelonitrile lyase activity; GO:0052689 carboxylic ester hydrolase activity; GO:0080030 methyl indole-3-acetate esterase activity; GO:0080031 methyl salicylate estera…	PF12697	Alpha/beta hydrolase family
Q9LP11	AT1G43910	AAA-ATPase At1g43910 OS=Arabidopsis thaliana OX=3702 GN=At1g43910 PE=1 SV=1	At1g43910	1.439	0.000638303	Up	54.2	18	7	7	5	0.784	0.814	0.848	1.218	1.197	1.105	chloroplast	K08900	BCS1; mitochondrial chaperone BCS1		GO:0001101 response to acid chemical; GO:0006950 response to stress; GO:0007154 cell communication; GO:0009267 cellular response to starvation; GO:0009605 response to external stimulus; GO:0009719 response to endogenous stimulus; GO:0009725 response to hormone; GO:0009737 response to abscisic acid; GO:0009987 cellular process; GO:0009991 response to extracellular stimulus; GO:0010033 response to …	GO:0005622 intracellular; GO:0005623 cell; GO:0005737 cytoplasm; GO:0005783 endoplasmic reticulum; GO:0005794 Golgi apparatus; GO:0005911 cell-cell junction; GO:0009506 plasmodesma; GO:0012505 endomembrane system; GO:0030054 cell junction; GO:0043226 organelle; GO:0043227 membrane-bounded organelle; GO:0043229 intracellular organelle; GO:0043231 intracellular membrane-bounded organelle; GO:004442…		PF00004	ATPase family associated with various cellular activities (AAA)	O	KOG0743	AAA+-type ATPase
Q9LS71	AT3G29240	AT3g29240/MXO21_9 OS=Arabidopsis thaliana OX=3702 GN=At3g29240 PE=2 SV=1	At3g29240	1.334	0.0140708	Up	34.5	9	2	2	2	0.834	0.792	0.945	1.114	1.245	1.07	chloroplast	K07735	algH; putative transcriptional regulator
Q9LSW6	AT5G43450	1-aminocyclopropane-1-carboxylate oxidase homolog 10 OS=Arabidopsis thaliana OX=3702 GN=At5g43450 PE=2 SV=1	At5g43450	1.337	0.0107033	Up	40.9	2	1	1	1	0.759	0.891	0.918	1.126	1.205	1.102	cytoplasm				GO:0006082 organic acid metabolic process; GO:0006109 regulation of carbohydrate metabolic process; GO:0006790 sulfur compound metabolic process; GO:0006807 nitrogen compound metabolic process; GO:0008152 metabolic process; GO:0009058 biosynthetic process; GO:0009889 regulation of biosynthetic process; GO:0009987 cellular process; GO:0010439 regulation of glucosinolate biosynthetic process; GO:00…	GO:0005911 cell-cell junction; GO:0009506 plasmodesma; GO:0030054 cell junction; GO:0055044 symplast;	GO:0003824 catalytic activity; GO:0009815 1-aminocyclopropane-1-carboxylate oxidase activity; GO:0016491 oxidoreductase activity; GO:0016638 oxidoreductase activity, acting on the CH-NH2 group of donors; GO:0016641 oxidoreductase activity, acting on the CH-NH2 group of donors, oxygen as acceptor;	PF03171	2OG-Fe(II) oxygenase superfamily	Q	KOG0143	Iron/ascorbate family oxidoreductases
Q9LSY7	AT3G21770	Peroxidase 30 OS=Arabidopsis thaliana OX=3702 GN=PER30 PE=1 SV=1	PER30	1.417	0.027197	Up	35.8	14	4	7	3	0.759	0.819	0.909	1.134	1.02	1.371	chloroplast	K00430	E1.11.1.7; peroxidase [EC:1.11.1.7]	map00940 Phenylpropanoid biosynthesis; map01100 Metabolic pathways; map01110 Biosynthesis of secondary metabolites	GO:0001101 response to acid chemical; GO:0006950 response to stress; GO:0006970 response to osmotic stress; GO:0006972 hyperosmotic response; GO:0008152 metabolic process; GO:0009266 response to temperature stimulus; GO:0009269 response to desiccation; GO:0009409 response to cold; GO:0009414 response to water deprivation; GO:0009415 response to water; GO:0009628 response to abiotic stimulus; GO:0…	GO:0005618 cell wall; GO:0005622 intracellular; GO:0005623 cell; GO:0005634 nucleus; GO:0005737 cytoplasm; GO:0005783 endoplasmic reticulum; GO:0005911 cell-cell junction; GO:0009505 plant-type cell wall; GO:0009506 plasmodesma; GO:0012505 endomembrane system; GO:0030054 cell junction; GO:0030312 external encapsulating structure; GO:0043226 organelle; GO:0043227 membrane-bounded organelle; GO:004…	GO:0003824 catalytic activity; GO:0004601 peroxidase activity; GO:0016209 antioxidant activity; GO:0016491 oxidoreductase activity; GO:0016684 oxidoreductase activity, acting on peroxide as acceptor;	PF00141	Peroxidase
Q9LT78	AT3G19390	Probable cysteine protease RD21C OS=Arabidopsis thaliana OX=3702 GN=RD21C PE=1 SV=1	RD21C	1.736	5.35443e-06	Up	49.3	2	1	2	1	0.731	0.74	0.722	1.232	1.277	1.298	extracellular				GO:0006464 cellular protein modification process; GO:0006508 proteolysis; GO:0006511 ubiquitin-dependent protein catabolic process; GO:0006807 nitrogen compound metabolic process; GO:0006950 response to stress; GO:0006952 defense response; GO:0006970 response to osmotic stress; GO:0007275 multicellular organism development; GO:0008152 metabolic process; GO:0009056 catabolic process; GO:0009057 ma…	GO:0000323 lytic vacuole; GO:0000932 P-body; GO:0005576 extracellular region; GO:0005615 extracellular space; GO:0005618 cell wall; GO:0005622 intracellular; GO:0005623 cell; GO:0005634 nucleus; GO:0005737 cytoplasm; GO:0005764 lysosome; GO:0005773 vacuole; GO:0005783 endoplasmic reticulum; GO:0005829 cytosol; GO:0005911 cell-cell junction; GO:0009506 plasmodesma; GO:0009507 chloroplast; GO:00095…	GO:0003824 catalytic activity; GO:0004175 endopeptidase activity; GO:0004197 cysteine-type endopeptidase activity; GO:0004842 ubiquitin-protein transferase activity; GO:0008233 peptidase activity; GO:0008234 cysteine-type peptidase activity; GO:0016740 transferase activity; GO:0016787 hydrolase activity; GO:0019787 ubiquitin-like protein transferase activity; GO:0070011 peptidase activity, acting…	PF08246; PF00112	Cathepsin propeptide inhibitor domain (I29); Papain family cysteine protease	O	KOG4296	Epithelin/granulin
Q9LTC0	AT5G47070	Probable serine/threonine-protein kinase PBL19 OS=Arabidopsis thaliana OX=3702 GN=PBL19 PE=1 SV=1	PBL19	1.39	0.00115583	Up	46.8	2	1	1	1	0.775	0.872	0.863	1.191	1.159	1.139	nucleus	K00924	E2.7.1.-; kinase [EC:2.7.1.-]		GO:0006464 cellular protein modification process; GO:0006468 protein phosphorylation; GO:0006793 phosphorus metabolic process; GO:0006796 phosphate-containing compound metabolic process; GO:0006807 nitrogen compound metabolic process; GO:0007154 cell communication; GO:0007165 signal transduction; GO:0007166 cell surface receptor signaling pathway; GO:0007167 enzyme linked receptor protein signali…	GO:0005623 cell; GO:0005886 plasma membrane; GO:0016020 membrane; GO:0044464 cell part; GO:0071944 cell periphery;	GO:0003824 catalytic activity; GO:0004672 protein kinase activity; GO:0004674 protein serine/threonine kinase activity; GO:0004675 transmembrane receptor protein serine/threonine kinase activity; GO:0004888 transmembrane signaling receptor activity; GO:0016301 kinase activity; GO:0016740 transferase activity; GO:0016772 transferase activity, transferring phosphorus-containing groups; GO:0016773 p…	PF07714	Protein tyrosine kinase	T	KOG1187	Serine/threonine protein kinase
Q9LV58	AT3G24500	Multiprotein-bridging factor 1c OS=Arabidopsis thaliana OX=3702 GN=MBF1C PE=1 SV=1	MBF1C	1.414	0.0219531	Up	16.4	7	1	1	1	0.916	0.848	0.721	1.049	1.31	1.156	cytoplasm	K03627	MBF1; putative transcription factor		GO:0000160 phosphorelay signal transduction system; GO:0001101 response to acid chemical; GO:0006355 regulation of transcription, DNA-templated; GO:0006950 response to stress; GO:0007154 cell communication; GO:0007165 signal transduction; GO:0009266 response to temperature stimulus; GO:0009408 response to heat; GO:0009414 response to water deprivation; GO:0009415 response to water; GO:0009628 res…	GO:0005622 intracellular; GO:0005623 cell; GO:0005634 nucleus; GO:0005730 nucleolus; GO:0005737 cytoplasm; GO:0031974 membrane-enclosed lumen; GO:0031981 nuclear lumen; GO:0043226 organelle; GO:0043227 membrane-bounded organelle; GO:0043228 non-membrane-bounded organelle; GO:0043229 intracellular organelle; GO:0043231 intracellular membrane-bounded organelle; GO:0043232 intracellular non-membrane…	GO:0003700 transcription factor activity, sequence-specific DNA binding; GO:0003712 transcription cofactor activity; GO:0003713 transcription coactivator activity;	PF01381	Helix-turn-helix	K	KOG3398	Transcription factor MBF1
Q9LYH6	AT5G11970	ABC family ABC transporter, putative (DUF3511) OS=Arabidopsis thaliana OX=3702 GN=At5g11970 PE=1 SV=1	At5g11970	1.384	0.00175188	Up	12.4	8	1	1	1	0.87	0.78	0.866	1.132	1.221	1.13	nucleus
Q9LYV6	AT5G13200	GEM-like protein 5 OS=Arabidopsis thaliana OX=3702 GN=At5g13200 PE=1 SV=1	At5g13200	1.902	0.000523734	Up	30.1	12	3	4	3	0.686	0.686	0.696	1.154	1.367	1.412	cytoplasm				GO:0000003 reproduction; GO:0001101 response to acid chemical; GO:0003006 developmental process involved in reproduction; GO:0007275 multicellular organism development; GO:0009719 response to endogenous stimulus; GO:0009725 response to hormone; GO:0009737 response to abscisic acid; GO:0009790 embryo development; GO:0009791 post-embryonic development; GO:0009793 embryo development ending in seed d…			PF02893	GRAM domain
Q9LZJ7	AT3G62680	Proline-rich protein 3 OS=Arabidopsis thaliana OX=3702 GN=PRP3 PE=2 SV=1	PRP3	1.466	0.0350252	Up	34.4	3	1	1	1	0.701	0.892	0.84	0.984	1.37	1.213	extracellular				GO:0006950 response to stress; GO:0007154 cell communication; GO:0007275 multicellular organism development; GO:0009267 cellular response to starvation; GO:0009605 response to external stimulus; GO:0009653 anatomical structure morphogenesis; GO:0009719 response to endogenous stimulus; GO:0009723 response to ethylene; GO:0009725 response to hormone; GO:0009733 response to auxin; GO:0009888 tissue …	GO:0005618 cell wall; GO:0005623 cell; GO:0005911 cell-cell junction; GO:0009506 plasmodesma; GO:0030054 cell junction; GO:0030312 external encapsulating structure; GO:0044464 cell part; GO:0055044 symplast; GO:0071944 cell periphery;
Q9M0D2	AT4G30280	Probable xyloglucan endotransglucosylase/hydrolase protein 18 OS=Arabidopsis thaliana OX=3702 GN=XTH18 PE=2 SV=1	XTH18	1.402	0.00508137	Up	32.1	10	2	2	1	0.747	0.834	0.917	1.199	1.136	1.168	extracellular	K08235	E2.4.1.207; xyloglucan:xyloglucosyl transferase [EC:2.4.1.207]		GO:0005975 carbohydrate metabolic process; GO:0005976 polysaccharide metabolic process; GO:0006073 cellular glucan metabolic process; GO:0006950 response to stress; GO:0008152 metabolic process; GO:0008283 cell proliferation; GO:0009266 response to temperature stimulus; GO:0009408 response to heat; GO:0009409 response to cold; GO:0009605 response to external stimulus; GO:0009612 response to mecha…	GO:0005618 cell wall; GO:0005622 intracellular; GO:0005623 cell; GO:0005737 cytoplasm; GO:0005794 Golgi apparatus; GO:0005886 plasma membrane; GO:0009505 plant-type cell wall; GO:0012505 endomembrane system; GO:0016020 membrane; GO:0030312 external encapsulating structure; GO:0043226 organelle; GO:0043227 membrane-bounded organelle; GO:0043229 intracellular organelle; GO:0043231 intracellular mem…	GO:0003824 catalytic activity; GO:0016740 transferase activity; GO:0016757 transferase activity, transferring glycosyl groups; GO:0016758 transferase activity, transferring hexosyl groups; GO:0016762 xyloglucan:xyloglucosyl transferase activity; GO:0046527 glucosyltransferase activity;	PF00722	Glycosyl hydrolases family 16
Q9M0M5	AT4G17230	Scarecrow-like protein 13 OS=Arabidopsis thaliana OX=3702 GN=SCL13 PE=2 SV=2	SCL13	1.335	0.000886919	Up	58.4	2	1	1	1	0.84	0.89	0.84	1.202	1.102	1.126	nucleus				GO:0006355 regulation of transcription, DNA-templated; GO:0009889 regulation of biosynthetic process; GO:0010468 regulation of gene expression; GO:0010556 regulation of macromolecule biosynthetic process; GO:0019219 regulation of nucleobase-containing compound metabolic process; GO:0019222 regulation of metabolic process; GO:0031323 regulation of cellular metabolic process; GO:0031326 regulation …	GO:0005622 intracellular; GO:0005623 cell; GO:0005634 nucleus; GO:0043226 organelle; GO:0043227 membrane-bounded organelle; GO:0043229 intracellular organelle; GO:0043231 intracellular membrane-bounded organelle; GO:0044424 intracellular part; GO:0044464 cell part;	GO:0003676 nucleic acid binding; GO:0003677 DNA binding; GO:0003700 transcription factor activity, sequence-specific DNA binding; GO:0005488 binding; GO:0043565 sequence-specific DNA binding; GO:0097159 organic cyclic compound binding; GO:1901363 heterocyclic compound binding;
Q9M1I7	AT3G57130	Regulatory protein NPR6 OS=Arabidopsis thaliana OX=3702 GN=NPR6 PE=1 SV=1	NPR6	1.595	0.00674175	Up	51.8	3	1	1	1	0.692	0.862	0.758	1.08	1.338	1.27	chloroplast	K14508	NPR1; regulatory protein NPR1	map04075 Plant hormone signal transduction	GO:0000003 reproduction; GO:0001101 response to acid chemical; GO:0002218 activation of innate immune response; GO:0002252 immune effector process; GO:0002253 activation of immune response; GO:0002376 immune system process; GO:0002682 regulation of immune system process; GO:0002684 positive regulation of immune system process; GO:0003002 regionalization; GO:0003006 developmental process involved …	GO:0000151 ubiquitin ligase complex; GO:0005622 intracellular; GO:0005623 cell; GO:0005634 nucleus; GO:0005737 cytoplasm; GO:0019005 SCF ubiquitin ligase complex; GO:0031461 cullin-RING ubiquitin ligase complex; GO:0032991 macromolecular complex; GO:0043226 organelle; GO:0043227 membrane-bounded organelle; GO:0043229 intracellular organelle; GO:0043231 intracellular membrane-bounded organelle; GO…	GO:0005488 binding; GO:0005515 protein binding; GO:0019899 enzyme binding; GO:0031625 ubiquitin protein ligase binding; GO:0044389 ubiquitin-like protein ligase binding;	PF00651	BTB/POZ domain	S	KOG0504	FOG: Ankyrin repeat
Q9M8K7	AT3G06110	Dual specificity protein phosphatase 1B OS=Arabidopsis thaliana OX=3702 GN=DSPTP1B PE=1 SV=1	DSPTP1B	1.414	0.0164941	Up	18.4	8	1	1	1	0.784	0.742	0.959	1.255	1.172	1.087	cytoplasm	K20551	MKP2; dual specificity protein phosphatase 1B [EC:3.1.3.16 3.1.3.48]	map04016 MAPK signaling pathway - plant	GO:0000188 inactivation of MAPK activity; GO:0000302 response to reactive oxygen species; GO:0001101 response to acid chemical; GO:0001932 regulation of protein phosphorylation; GO:0001933 negative regulation of protein phosphorylation; GO:0002682 regulation of immune system process; GO:0002683 negative regulation of immune system process; GO:0006464 cellular protein modification process; GO:0006…	GO:0005622 intracellular; GO:0005623 cell; GO:0005634 nucleus; GO:0005737 cytoplasm; GO:0005886 plasma membrane; GO:0016020 membrane; GO:0043226 organelle; GO:0043227 membrane-bounded organelle; GO:0043229 intracellular organelle; GO:0043231 intracellular membrane-bounded organelle; GO:0044424 intracellular part; GO:0044464 cell part; GO:0071944 cell periphery;	GO:0003824 catalytic activity; GO:0004721 phosphoprotein phosphatase activity; GO:0005488 binding; GO:0005515 protein binding; GO:0005516 calmodulin binding; GO:0008138 protein tyrosine/serine/threonine phosphatase activity; GO:0016787 hydrolase activity; GO:0016788 hydrolase activity, acting on ester bonds; GO:0016791 phosphatase activity; GO:0033549 MAP kinase phosphatase activity; GO:0042578 p…	PF00782	Dual specificity phosphatase, catalytic domain	V	KOG1716	Dual specificity phosphatase
Q9M9E9	AT1G78290	Serine/threonine-protein kinase SRK2C OS=Arabidopsis thaliana OX=3702 GN=SRK2C PE=1 SV=1	SRK2C	1.527	0.000502431	Up	38.2	8	3	3	3	0.752	0.784	0.838	1.174	1.273	1.178	cytoplasm	K14498	SNRK2; serine/threonine-protein kinase SRK2 [EC:2.7.11.1]	map04016 MAPK signaling pathway - plant; map04075 Plant hormone signal transduction	GO:0001101 response to acid chemical; GO:0006464 cellular protein modification process; GO:0006468 protein phosphorylation; GO:0006793 phosphorus metabolic process; GO:0006796 phosphate-containing compound metabolic process; GO:0006807 nitrogen compound metabolic process; GO:0006950 response to stress; GO:0006970 response to osmotic stress; GO:0007154 cell communication; GO:0007165 signal transdu…	GO:0005622 intracellular; GO:0005623 cell; GO:0005634 nucleus; GO:0005737 cytoplasm; GO:0005829 cytosol; GO:0043226 organelle; GO:0043227 membrane-bounded organelle; GO:0043229 intracellular organelle; GO:0043231 intracellular membrane-bounded organelle; GO:0044424 intracellular part; GO:0044444 cytoplasmic part; GO:0044464 cell part;	GO:0003824 catalytic activity; GO:0004672 protein kinase activity; GO:0004674 protein serine/threonine kinase activity; GO:0016301 kinase activity; GO:0016740 transferase activity; GO:0016772 transferase activity, transferring phosphorus-containing groups; GO:0016773 phosphotransferase activity, alcohol group as acceptor;	PF00069	Protein kinase domain	T	KOG0583	Serine/threonine protein kinase
Q9MA63	AT3G05500	REF/SRPP-like protein At3g05500 OS=Arabidopsis thaliana OX=3702 GN=At3g05500 PE=1 SV=1	At3g05500	1.972	9.66861e-05	Up	27.2	37	8	11	8	0.67	0.68	0.667	1.215	1.38	1.383	cytoplasm				GO:0006996 organelle organization; GO:0009987 cellular process; GO:0010876 lipid localization; GO:0016043 cellular component organization; GO:0019915 lipid storage; GO:0032502 developmental process; GO:0033036 macromolecule localization; GO:0034389 lipid particle organization; GO:0040007 growth; GO:0040008 regulation of growth; GO:0045927 positive regulation of growth; GO:0048518 positive regulat…	GO:0005622 intracellular; GO:0005623 cell; GO:0005737 cytoplasm; GO:0005773 vacuole; GO:0005811 lipid particle; GO:0043226 organelle; GO:0043227 membrane-bounded organelle; GO:0043228 non-membrane-bounded organelle; GO:0043229 intracellular organelle; GO:0043231 intracellular membrane-bounded organelle; GO:0043232 intracellular non-membrane-bounded organelle; GO:0044424 intracellular part; GO:004…
Q9S745	AT3G52430	Lipase-like PAD4 OS=Arabidopsis thaliana OX=3702 GN=PAD4 PE=1 SV=1	PAD4	1.362	0.00628555	Up	60.9	4	2	2	2	0.854	0.883	0.804	1.054	1.146	1.26	nucleus				GO:0001101 response to acid chemical; GO:0001666 response to hypoxia; GO:0002213 defense response to insect; GO:0002376 immune system process; GO:0002831 regulation of response to biotic stimulus; GO:0002833 positive regulation of response to biotic stimulus; GO:0006950 response to stress; GO:0006952 defense response; GO:0006955 immune response; GO:0007154 cell communication; GO:0007165 signal tr…	GO:0005622 intracellular; GO:0005623 cell; GO:0005634 nucleus; GO:0005737 cytoplasm; GO:0043226 organelle; GO:0043227 membrane-bounded organelle; GO:0043229 intracellular organelle; GO:0043231 intracellular membrane-bounded organelle; GO:0044424 intracellular part; GO:0044464 cell part;	GO:0003824 catalytic activity; GO:0016298 lipase activity; GO:0016787 hydrolase activity; GO:0016788 hydrolase activity, acting on ester bonds;
Q9S7L6	AT2G05230	At2g05250/F5G3.15 OS=Arabidopsis thaliana OX=3702 GN=At2g05230 PE=2 SV=1	At2g05230	1.517	0.00256219	Up	79	1	1	1	1	0.79	0.812	0.782	1.223	1.32	1.073	nucleus							PF00226	DnaJ domain
Q9SAG7	AT1G80930	At1g80930/F23A5_23 OS=Arabidopsis thaliana OX=3702 GN=At1g80930 PE=1 SV=1	At1g80930	1.333	0.0318528	Up	104	1	1	1	1	0.755	0.936	0.88	1.095	1.048	1.285	nucleus	K13100	CWC22; pre-mRNA-splicing factor CWC22							S	KOG2140	Uncharacterized conserved protein
Q9SCS6	AT3G50480	RPW8-like protein 4 OS=Arabidopsis thaliana OX=3702 GN=HR4 PE=2 SV=1	HR4	1.638	0.0024921	Up	23.4	6	1	2	1	0.731	0.703	0.84	1.123	1.309	1.293	cytoplasm
Q9SD94	AT5G07900	Mitochondrial transcription termination factor family protein OS=Arabidopsis thaliana OX=3702 GN=At5g07900 PE=2 SV=1	At5g07900	1.361	0.0264981	Up	45.8	9	3	4	3	0.906	0.855	0.78	0.983	1.256	1.219	chloroplast	K15032	MTERFD; mTERF domain-containing protein, mitochondrial							K	KOG1267	Mitochondrial transcription termination factor, mTERF
Q9SEH3	AT4G17530	Ras-related protein RABD2c OS=Arabidopsis thaliana OX=3702 GN=RABD2C PE=1 SV=1	RABD2C	1.314	0.011742	Up	22.3	64	11	33	2	0.872	0.856	0.871	1.004	1.211	1.2	nucleus	K07874	RAB1A; Ras-related protein Rab-1A		GO:0000003 reproduction; GO:0000902 cell morphogenesis; GO:0000904 cell morphogenesis involved in differentiation; GO:0003006 developmental process involved in reproduction; GO:0006810 transport; GO:0006888 ER to Golgi vesicle-mediated transport; GO:0007275 multicellular organism development; GO:0009555 pollen development; GO:0009653 anatomical structure morphogenesis; GO:0009826 unidimensional c…	GO:0000139 Golgi membrane; GO:0005622 intracellular; GO:0005623 cell; GO:0005737 cytoplasm; GO:0005773 vacuole; GO:0005783 endoplasmic reticulum; GO:0005789 endoplasmic reticulum membrane; GO:0005794 Golgi apparatus; GO:0005829 cytosol; GO:0005886 plasma membrane; GO:0005911 cell-cell junction; GO:0009506 plasmodesma; GO:0012505 endomembrane system; GO:0016020 membrane; GO:0030054 cell junction; …		PF00071	Ras family	U	KOG0084	GTPase Rab1/YPT1, small G protein superfamily, and related GTP-binding proteins
Q9SIJ6	AT2G21640	Marker for oxidative stress response protein OS=Arabidopsis thaliana OX=3702 GN=At2g21640 PE=1 SV=1	At2g21640	1.368	0.000785676	Up	11.7	32	2	3	2	0.86	0.806	0.868	1.162	1.202	1.103	chloroplast
Q9SJ81	AT2G04780	Fasciclin-like arabinogalactan protein 7 OS=Arabidopsis thaliana OX=3702 GN=FLA7 PE=2 SV=1	FLA7	1.718	0.00211766	Up	26.8	11	2	2	2	0.71	0.679	0.819	1.189	1.206	1.398	plasma membrane					GO:0005623 cell; GO:0005886 plasma membrane; GO:0016020 membrane; GO:0031224 intrinsic component of membrane; GO:0031225 anchored component of membrane; GO:0031226 intrinsic component of plasma membrane; GO:0044425 membrane part; GO:0044459 plasma membrane part; GO:0044464 cell part; GO:0046658 anchored component of plasma membrane; GO:0071944 cell periphery;		PF02469	Fasciclin domain
Q9SLK2	AT1G54320	ALA-interacting subunit 3 OS=Arabidopsis thaliana OX=3702 GN=ALIS3 PE=1 SV=1	ALIS3	1.84	0.000266183	Up	38.9	3	1	1	1	0.73	0.719	0.664	1.395	1.279	1.213	plasma membrane				GO:0006810 transport; GO:0006811 ion transport; GO:0006820 anion transport; GO:0006869 lipid transport; GO:0010876 lipid localization; GO:0015711 organic anion transport; GO:0015748 organophosphate ester transport; GO:0015914 phospholipid transport; GO:0033036 macromolecule localization; GO:0051179 localization; GO:0051234 establishment of localization; GO:0071702 organic substance transport;	GO:0000139 Golgi membrane; GO:0005622 intracellular; GO:0005623 cell; GO:0005737 cytoplasm; GO:0005768 endosome; GO:0005770 late endosome; GO:0005783 endoplasmic reticulum; GO:0005789 endoplasmic reticulum membrane; GO:0005794 Golgi apparatus; GO:0005886 plasma membrane; GO:0010008 endosome membrane; GO:0012505 endomembrane system; GO:0016020 membrane; GO:0031090 organelle membrane; GO:0031410 cy…				DKT	KOG2952	Cell cycle control protein
Q9SR36	AT3G09270	Glutathione S-transferase U8 OS=Arabidopsis thaliana OX=3702 GN=GSTU8 PE=2 SV=1	GSTU8	1.601	0.00384043	Up	25.7	3	1	1	1	0.706	0.815	0.786	1.077	1.308	1.308	cytoplasm	K00799	GST, gst; glutathione S-transferase [EC:2.5.1.18]	map00480 Glutathione metabolism; map01100 Metabolic pathways	GO:0001101 response to acid chemical; GO:0006518 peptide metabolic process; GO:0006575 cellular modified amino acid metabolic process; GO:0006749 glutathione metabolic process; GO:0006790 sulfur compound metabolic process; GO:0006807 nitrogen compound metabolic process; GO:0006950 response to stress; GO:0008152 metabolic process; GO:0009056 catabolic process; GO:0009266 response to temperature st…	GO:0005622 intracellular; GO:0005623 cell; GO:0005737 cytoplasm; GO:0044424 intracellular part; GO:0044464 cell part;	GO:0003824 catalytic activity; GO:0004364 glutathione transferase activity; GO:0016740 transferase activity; GO:0016765 transferase activity, transferring alkyl or aryl (other than methyl) groups;	PF13417; PF00043	Glutathione S-transferase, N-terminal domain; Glutathione S-transferase, C-terminal domain	O	KOG0406	Glutathione S-transferase
Q9SRH6	AT3G01290	Hypersensitive-induced response protein 3 OS=Arabidopsis thaliana OX=3702 GN=HIR3 PE=1 SV=1	HIR3	1.414	0.0112957	Up	31.3	15	4	12	2	0.823	0.837	0.822	0.999	1.238	1.272	cytoplasm				GO:0002239 response to oomycetes; GO:0009605 response to external stimulus; GO:0009607 response to biotic stimulus; GO:0043207 response to external biotic stimulus; GO:0050896 response to stimulus; GO:0051704 multi-organism process; GO:0051707 response to other organism;	GO:0005622 intracellular; GO:0005623 cell; GO:0005737 cytoplasm; GO:0005739 mitochondrion; GO:0005773 vacuole; GO:0005774 vacuolar membrane; GO:0005794 Golgi apparatus; GO:0005886 plasma membrane; GO:0005911 cell-cell junction; GO:0009506 plasmodesma; GO:0009507 chloroplast; GO:0009536 plastid; GO:0012505 endomembrane system; GO:0016020 membrane; GO:0030054 cell junction; GO:0031090 organelle mem…	GO:0005488 binding; GO:0005515 protein binding; GO:0019899 enzyme binding; GO:0019900 kinase binding; GO:0019901 protein kinase binding; GO:0043424 protein histidine kinase binding;			C	KOG2620	Prohibitins and stomatins of the PID superfamily
Q9SRM5	AT3G11210	GDSL esterase/lipase CPRD49 OS=Arabidopsis thaliana OX=3702 GN=CPRD49 PE=2 SV=1	CPRD49	1.309	0.0420957	Up	28.6	5	1	2	1	0.938	0.815	0.845	0.966	1.176	1.259	chloroplast					GO:0005576 extracellular region; GO:0048046 apoplast;		PF13472	GDSL-like Lipase/Acylhydrolase family	I	KOG3035	Isoamyl acetate-hydrolyzing esterase
Q9SRS9	AT3G07370	E3 ubiquitin-protein ligase CHIP OS=Arabidopsis thaliana OX=3702 GN=CHIP PE=1 SV=1	CHIP	1.311	0.0222379	Up	31.6	4	1	1	1	0.82	0.846	0.931	1.07	1.282	1.052	cytoplasm	K09561	STUB1, CHIP; STIP1 homology and U-box containing protein 1 [EC:2.3.2.27]	map04120 Ubiquitin mediated proteolysis; map04141 Protein processing in endoplasmic reticulum	GO:0001101 response to acid chemical; GO:0006464 cellular protein modification process; GO:0006807 nitrogen compound metabolic process; GO:0006950 response to stress; GO:0006970 response to osmotic stress; GO:0008152 metabolic process; GO:0009266 response to temperature stimulus; GO:0009628 response to abiotic stimulus; GO:0009651 response to salt stress; GO:0009719 response to endogenous stimulu…		GO:0003824 catalytic activity; GO:0004842 ubiquitin-protein transferase activity; GO:0005488 binding; GO:0005515 protein binding; GO:0016740 transferase activity; GO:0019787 ubiquitin-like protein transferase activity; GO:0051087 chaperone binding;	PF04564	U-box domain	O	KOG4642	Chaperone-dependent E3 ubiquitin protein ligase (contains TPR repeats)
Q9SSN2	AT1G72940	At1g72940/F3N23_14 OS=Arabidopsis thaliana OX=3702 GN=At1g72940 PE=2 SV=1	At1g72940	1.359	0.00264517	Up	42.3	2	1	2	1	0.821	0.819	0.904	1.104	1.228	1.126	cytoplasm							PF00931	NB-ARC domain
Q9SX65	AT1G48320	1,4-dihydroxy-2-naphthoyl-CoA thioesterase 1 OS=Arabidopsis thaliana OX=3702 GN=DHNAT1 PE=1 SV=1	DHNAT1	1.363	0.0216963	Up	16.7	17	2	2	2	0.787	0.883	0.869	0.988	1.259	1.214	cytoplasm	K19222	menI, DHNAT; 1,4-dihydroxy-2-naphthoyl-CoA hydrolase [EC:3.1.2.28]	map00130 Ubiquinone and other terpenoid-quinone biosynthesis; map01100 Metabolic pathways; map01110 Biosynthesis of secondary metabolites	GO:0006732 coenzyme metabolic process; GO:0006766 vitamin metabolic process; GO:0008152 metabolic process; GO:0009058 biosynthetic process; GO:0009108 coenzyme biosynthetic process; GO:0009110 vitamin biosynthetic process; GO:0009987 cellular process; GO:0016043 cellular component organization; GO:0022607 cellular component assembly; GO:0042180 cellular ketone metabolic process; GO:0042181 ketone…	GO:0005622 intracellular; GO:0005623 cell; GO:0005737 cytoplasm; GO:0005777 peroxisome; GO:0042579 microbody; GO:0043226 organelle; GO:0043227 membrane-bounded organelle; GO:0043229 intracellular organelle; GO:0043231 intracellular membrane-bounded organelle; GO:0044424 intracellular part; GO:0044444 cytoplasmic part; GO:0044464 cell part;		PF03061	Thioesterase superfamily	Q	KOG3328	HGG motif-containing thioesterase
Q9SYW8	AT3G61470	Photosystem I chlorophyll a/b-binding protein 2, chloroplastic OS=Arabidopsis thaliana OX=3702 GN=LHCA2 PE=1 SV=1	LHCA2	1.307	0.039959	Up	27.7	30	4	14	4	0.849	0.863	0.909	0.967	1.168	1.29	chloroplast	K08908	LHCA2; light-harvesting complex I chlorophyll a/b binding protein 2	map00196 Photosynthesis - antenna proteins; map01100 Metabolic pathways	GO:0006091 generation of precursor metabolites and energy; GO:0006950 response to stress; GO:0008152 metabolic process; GO:0009266 response to temperature stimulus; GO:0009314 response to radiation; GO:0009409 response to cold; GO:0009416 response to light stimulus; GO:0009628 response to abiotic stimulus; GO:0009642 response to light intensity; GO:0009644 response to high light intensity; GO:000…	GO:0005622 intracellular; GO:0005623 cell; GO:0005737 cytoplasm; GO:0009507 chloroplast; GO:0009526 plastid envelope; GO:0009532 plastid stroma; GO:0009534 chloroplast thylakoid; GO:0009535 chloroplast thylakoid membrane; GO:0009536 plastid; GO:0009570 chloroplast stroma; GO:0009579 thylakoid; GO:0009941 chloroplast envelope; GO:0010287 plastoglobule; GO:0016020 membrane; GO:0031967 organelle env…	GO:0005488 binding; GO:0005515 protein binding; GO:0016168 chlorophyll binding; GO:0019904 protein domain specific binding; GO:0031409 pigment binding; GO:0043167 ion binding; GO:0043168 anion binding; GO:0046906 tetrapyrrole binding; GO:0048037 cofactor binding; GO:0097159 organic cyclic compound binding; GO:1901363 heterocyclic compound binding;
Q9XGZ3	AT5G25940	Early nodulin-like protein OS=Arabidopsis thaliana OX=3702 GN=At5g25940 PE=2 SV=1	At5g25940	1.496	0.0411924	Up	12.3	8	1	2	1	0.819	0.762	0.823	0.916	1.386	1.294	extracellular
Q9ZPX9	AT2G46600	Calcium-binding protein KIC OS=Arabidopsis thaliana OX=3702 GN=KIC PE=1 SV=2	KIC	1.336	0.036252	Up	15.2	7	1	1	1	0.835	0.883	0.85	1.347	1.087	0.997	mitochondria	K10840	CETN2; centrin-2	map03420 Nucleotide excision repair	GO:0000902 cell morphogenesis; GO:0000904 cell morphogenesis involved in differentiation; GO:0009653 anatomical structure morphogenesis; GO:0009888 tissue development; GO:0009987 cellular process; GO:0010026 trichome differentiation; GO:0010090 trichome morphogenesis; GO:0010091 trichome branching; GO:0016043 cellular component organization; GO:0030154 cell differentiation; GO:0032502 development…		GO:0005488 binding; GO:0005509 calcium ion binding; GO:0043167 ion binding; GO:0043169 cation binding; GO:0046872 metal ion binding;	PF13833	EF-hand domain pair	DZ	KOG0028	Ca2+-binding protein (centrin/caltractin), EF-Hand superfamily protein
Q9ZSK2	AT2G31200	Actin-depolymerizing factor 6 OS=Arabidopsis thaliana OX=3702 GN=ADF6 PE=1 SV=1	ADF6	1.396	0.000306738	Up	16.7	25	2	3	2	0.801	0.869	0.834	1.175	1.192	1.129	chloroplast	K05765	CFL; cofilin		GO:0006996 organelle organization; GO:0007010 cytoskeleton organization; GO:0007015 actin filament organization; GO:0008154 actin polymerization or depolymerization; GO:0009987 cellular process; GO:0016043 cellular component organization; GO:0022411 cellular component disassembly; GO:0030029 actin filament-based process; GO:0030036 actin cytoskeleton organization; GO:0030042 actin filament depoly…			PF00241	Cofilin/tropomyosin-type actin-binding protein	Z	KOG1735	Actin depolymerizing factor
Q9ZV52	AT2G18660	EG45-like domain containing protein 2 OS=Arabidopsis thaliana OX=3702 GN=EGC2 PE=2 SV=2	EGC2	1.557	0.0223061	Up	14.5	13	2	2	2	0.65	0.898	0.799	1.035	1.294	1.325	extracellular				GO:0002376 immune system process; GO:0006091 generation of precursor metabolites and energy; GO:0006950 response to stress; GO:0006952 defense response; GO:0006955 immune response; GO:0008152 metabolic process; GO:0009060 aerobic respiration; GO:0009605 response to external stimulus; GO:0009607 response to biotic stimulus; GO:0009627 systemic acquired resistance; GO:0009814 defense response, inco…	GO:0005576 extracellular region; GO:0005618 cell wall; GO:0005623 cell; GO:0030312 external encapsulating structure; GO:0044464 cell part; GO:0048046 apoplast; GO:0071944 cell periphery;		PF03330	Rare lipoprotein A (RlpA)-like double-psi beta-barrel
Q9ZVU4	AT1G55450	At1g55450/T5A14_14 OS=Arabidopsis thaliana OX=3702 GN=At1g55450 PE=2 SV=1	At1g55450	1.34	0.00452388	Up	34.5	12	3	6	3	0.861	0.858	0.873	1.047	1.192	1.235	cytoplasm							PF08241	Methyltransferase domain	Q	KOG3010	Methyltransferase
A0A1P8AMY2	AT1G10680	p-glycoprotein 10 OS=Arabidopsis thaliana OX=3702 GN=PGP10 PE=4 SV=1	PGP10	0.765	0.0423457	Down	129.2	4	4	4	1	1.135	1.152	1.108	1.01	0.856	0.731	plasma membrane	K05658	ABCB1, CD243; ATP-binding cassette, subfamily B (MDR/TAP), member 1 [EC:7.6.2.2]	map02010 ABC transporters		GO:0005622 intracellular; GO:0005623 cell; GO:0005737 cytoplasm; GO:0005739 mitochondrion; GO:0016020 membrane; GO:0043226 organelle; GO:0043227 membrane-bounded organelle; GO:0043229 intracellular organelle; GO:0043231 intracellular membrane-bounded organelle; GO:0044424 intracellular part; GO:0044444 cytoplasmic part; GO:0044464 cell part;		PF00005	ABC transporter	Q	KOG0055	Multidrug/pheromone exporter, ABC superfamily
A0A1P8AQR4	AT1G54020	GDSL-like Lipase/Acylhydrolase superfamily protein OS=Arabidopsis thaliana OX=3702 GN=At1g54020 PE=4 SV=1	At1g54020	0.746	0.0045387	Down	27.4	6	1	1	1	1.15	1.149	1.138	0.774	0.922	0.868	cytoplasm				GO:0006082 organic acid metabolic process; GO:0006790 sulfur compound metabolic process; GO:0006807 nitrogen compound metabolic process; GO:0006810 transport; GO:0006886 intracellular protein transport; GO:0006950 response to stress; GO:0006952 defense response; GO:0006996 organelle organization; GO:0007029 endoplasmic reticulum organization; GO:0008104 protein localization; GO:0008152 metabolic …	GO:0000325 plant-type vacuole; GO:0005576 extracellular region; GO:0005618 cell wall; GO:0005622 intracellular; GO:0005623 cell; GO:0005634 nucleus; GO:0005737 cytoplasm; GO:0005773 vacuole; GO:0005774 vacuolar membrane; GO:0005777 peroxisome; GO:0005783 endoplasmic reticulum; GO:0005829 cytosol; GO:0005840 ribosome; GO:0005911 cell-cell junction; GO:0009505 plant-type cell wall; GO:0009506 plasm…
A0A1P8AST0	AT1G07720	3-ketoacyl-CoA synthase OS=Arabidopsis thaliana OX=3702 GN=KCS3 PE=3 SV=1	KCS3	0.725	0.014612	Down	59.1	2	1	1	1	1.188	1.118	1.172	0.975	0.778	0.769	chloroplast	K15397	KCS; 3-ketoacyl-CoA synthase [EC:2.3.1.199]	map00062 Fatty acid elongation; map01100 Metabolic pathways; map01110 Biosynthesis of secondary metabolites; map04626 Plant-pathogen interaction	GO:0006950 response to stress; GO:0009266 response to temperature stimulus; GO:0009314 response to radiation; GO:0009409 response to cold; GO:0009416 response to light stimulus; GO:0009628 response to abiotic stimulus; GO:0050896 response to stimulus;	GO:0005622 intracellular; GO:0005623 cell; GO:0005737 cytoplasm; GO:0005783 endoplasmic reticulum; GO:0012505 endomembrane system; GO:0043226 organelle; GO:0043227 membrane-bounded organelle; GO:0043229 intracellular organelle; GO:0043231 intracellular membrane-bounded organelle; GO:0044424 intracellular part; GO:0044444 cytoplasmic part; GO:0044464 cell part;		PF08541	3-Oxoacyl-[acyl-carrier-protein (ACP)] synthase III C terminal
A8MSF9	AT4G28250	Expansin B3 OS=Arabidopsis thaliana OX=3702 GN=EXPB3 PE=3 SV=1	EXPB3	0.759	0.0182933	Down	27.7	12	3	3	3	1.06	1.176	1.155	0.799	0.803	0.973	chloroplast	K20628	exlX; expansin		GO:0006949 syncytium formation; GO:0009653 anatomical structure morphogenesis; GO:0009987 cellular process; GO:0032502 developmental process; GO:0048646 anatomical structure formation involved in morphogenesis; GO:0048856 anatomical structure development;	GO:0005618 cell wall; GO:0005623 cell; GO:0005911 cell-cell junction; GO:0009506 plasmodesma; GO:0016020 membrane; GO:0030054 cell junction; GO:0030312 external encapsulating structure; GO:0044464 cell part; GO:0055044 symplast; GO:0071944 cell periphery;		PF03330; PF01357	Rare lipoprotein A (RlpA)-like double-psi beta-barrel; Pollen allergen
F4HYR4	AT1G62330	O-fucosyltransferase 15 OS=Arabidopsis thaliana OX=3702 GN=OFUT15 PE=2 SV=1	OFUT15	0.749	0.0311324	Down	73.3	3	2	3	2	1.096	1.101	1.233	0.997	0.76	0.812	plasma membrane					GO:0005622 intracellular; GO:0005623 cell; GO:0005737 cytoplasm; GO:0005768 endosome; GO:0005794 Golgi apparatus; GO:0005802 trans-Golgi network; GO:0012505 endomembrane system; GO:0031410 cytoplasmic vesicle; GO:0031982 vesicle; GO:0031984 organelle subcompartment; GO:0043226 organelle; GO:0043227 membrane-bounded organelle; GO:0043229 intracellular organelle; GO:0043231 intracellular membrane-b…
F4IC87	AT1G12430	Kinesin-like protein OS=Arabidopsis thaliana OX=3702 GN=ARK3 PE=3 SV=1	ARK3	0.754	0.0127701	Down	100.9	6	4	5	3	1.094	1.118	1.209	0.964	0.817	0.8	chloroplast	K10396	KIF5; kinesin family member 5	map04144 Endocytosis	GO:0006928 movement of cell or subcellular component; GO:0007017 microtubule-based process; GO:0007018 microtubule-based movement; GO:0009987 cellular process;	GO:0005622 intracellular; GO:0005623 cell; GO:0005856 cytoskeleton; GO:0005871 kinesin complex; GO:0005875 microtubule associated complex; GO:0015630 microtubule cytoskeleton; GO:0032991 macromolecular complex; GO:0043226 organelle; GO:0043228 non-membrane-bounded organelle; GO:0043229 intracellular organelle; GO:0043232 intracellular non-membrane-bounded organelle; GO:0044422 organelle part; GO:…	GO:0003774 motor activity; GO:0003777 microtubule motor activity; GO:0003824 catalytic activity; GO:0016462 pyrophosphatase activity; GO:0016787 hydrolase activity; GO:0016817 hydrolase activity, acting on acid anhydrides; GO:0016818 hydrolase activity, acting on acid anhydrides, in phosphorus-containing anhydrides; GO:0016887 ATPase activity; GO:0017111 nucleoside-triphosphatase activity;	PF00225	Kinesin motor domain	Z	KOG0240	Kinesin (SMY1 subfamily)
F4J2T9	AT3G22980	Ribosomal protein S5/Elongation factor G/III/V family protein OS=Arabidopsis thaliana OX=3702 GN=At3g22980 PE=4 SV=1	At3g22980	0.742	0.0372716	Down	111.9	7	5	6	5	1.112	1.174	1.176	1.018	0.825	0.726	cytoplasm	K14536	RIA1; ribosome assembly protein 1 [EC:3.6.5.-]	map03008 Ribosome biogenesis in eukaryotes				PF00009; PF03144; PF00679	Elongation factor Tu GTP binding domain; Elongation factor Tu domain 2; Elongation factor G C-terminus	J	KOG0467	Translation elongation factor 2/ribosome biogenesis protein RIA1 and related proteins
F4KDI6	AT5G58100	Transmembrane protein OS=Arabidopsis thaliana OX=3702 GN=At5g58100 PE=4 SV=1	At5g58100	0.599	0.0173784	Down	107.6	3	3	3	3	1.243	1.278	1.296	0.95	0.595	0.741	plasma membrane
O48946	AT4G32410	Cellulose synthase A catalytic subunit 1 [UDP-forming] OS=Arabidopsis thaliana OX=3702 GN=CESA1 PE=1 SV=1	CESA1	0.709	0.000331104	Down	122.2	11	10	16	10	1.13	1.205	1.199	0.87	0.808	0.827	plasma membrane	K10999	CESA; cellulose synthase A [EC:2.4.1.12]		GO:0000271 polysaccharide biosynthetic process; GO:0000278 mitotic cell cycle; GO:0000281 mitotic cytokinesis; GO:0000910 cytokinesis; GO:0005975 carbohydrate metabolic process; GO:0005976 polysaccharide metabolic process; GO:0006073 cellular glucan metabolic process; GO:0006950 response to stress; GO:0006970 response to osmotic stress; GO:0006972 hyperosmotic response; GO:0007049 cell cycle; GO:…	GO:0005622 intracellular; GO:0005623 cell; GO:0005737 cytoplasm; GO:0005768 endosome; GO:0005794 Golgi apparatus; GO:0005802 trans-Golgi network; GO:0005886 plasma membrane; GO:0012505 endomembrane system; GO:0016020 membrane; GO:0031410 cytoplasmic vesicle; GO:0031982 vesicle; GO:0031984 organelle subcompartment; GO:0043226 organelle; GO:0043227 membrane-bounded organelle; GO:0043229 intracellul…	GO:0003824 catalytic activity; GO:0016740 transferase activity; GO:0016757 transferase activity, transferring glycosyl groups; GO:0016758 transferase activity, transferring hexosyl groups; GO:0016759 cellulose synthase activity; GO:0046527 glucosyltransferase activity;
O48947	AT4G39350	Cellulose synthase A catalytic subunit 2 [UDP-forming] OS=Arabidopsis thaliana OX=3702 GN=CESA2 PE=1 SV=1	CESA2	0.751	0.041525	Down	122	3	3	3	1	1.046	1.155	1.173	0.997	0.81	0.728	plasma membrane	K10999	CESA; cellulose synthase A [EC:2.4.1.12]		GO:0000003 reproduction; GO:0000226 microtubule cytoskeleton organization; GO:0000271 polysaccharide biosynthetic process; GO:0000278 mitotic cell cycle; GO:0000281 mitotic cytokinesis; GO:0000910 cytokinesis; GO:0003006 developmental process involved in reproduction; GO:0005975 carbohydrate metabolic process; GO:0005976 polysaccharide metabolic process; GO:0006073 cellular glucan metabolic proce…	GO:0005622 intracellular; GO:0005623 cell; GO:0005737 cytoplasm; GO:0005794 Golgi apparatus; GO:0005886 plasma membrane; GO:0005887 integral component of plasma membrane; GO:0010330 cellulose synthase complex; GO:0012505 endomembrane system; GO:0016020 membrane; GO:0016021 integral component of membrane; GO:0031224 intrinsic component of membrane; GO:0031226 intrinsic component of plasma membrane…	GO:0003824 catalytic activity; GO:0016740 transferase activity; GO:0016757 transferase activity, transferring glycosyl groups; GO:0016758 transferase activity, transferring hexosyl groups; GO:0016759 cellulose synthase activity; GO:0046527 glucosyltransferase activity;
O49603	AT5G64620	Cell wall / vacuolar inhibitor of fructosidase 2 OS=Arabidopsis thaliana OX=3702 GN=C/VIF2 PE=1 SV=1	C/VIF2	0.695	0.000185027	Down	19.6	4	1	2	1	1.171	1.206	1.162	0.782	0.851	0.828	extracellular				GO:0009628 response to abiotic stimulus; GO:0043086 negative regulation of catalytic activity; GO:0044092 negative regulation of molecular function; GO:0050790 regulation of catalytic activity; GO:0050896 response to stimulus; GO:0065007 biological regulation; GO:0065009 regulation of molecular function; GO:0080167 response to karrikin;		GO:0004857 enzyme inhibitor activity; GO:0030234 enzyme regulator activity; GO:0046910 pectinesterase inhibitor activity; GO:0098772 molecular function regulator;	PF04043	Plant invertase/pectin methylesterase inhibitor
P0DI10	AT1G05240	Peroxidase 1 OS=Arabidopsis thaliana OX=3702 GN=PER1 PE=1 SV=1	PER1	0.756	0.0074545	Down	35.6	24	6	15	6	1.087	1.2	1.116	0.78	0.879	0.914	extracellular	K00430	E1.11.1.7; peroxidase [EC:1.11.1.7]	map00940 Phenylpropanoid biosynthesis; map01100 Metabolic pathways; map01110 Biosynthesis of secondary metabolites	GO:0006725 cellular aromatic compound metabolic process; GO:0008152 metabolic process; GO:0009636 response to toxic substance; GO:0009664 plant-type cell wall organization; GO:0009698 phenylpropanoid metabolic process; GO:0009808 lignin metabolic process; GO:0009987 cellular process; GO:0016043 cellular component organization; GO:0019748 secondary metabolic process; GO:0042221 response to chemica…	GO:0005618 cell wall; GO:0005623 cell; GO:0005911 cell-cell junction; GO:0009505 plant-type cell wall; GO:0009506 plasmodesma; GO:0030054 cell junction; GO:0030312 external encapsulating structure; GO:0044464 cell part; GO:0055044 symplast; GO:0071944 cell periphery;	GO:0003824 catalytic activity; GO:0004601 peroxidase activity; GO:0016209 antioxidant activity; GO:0016491 oxidoreductase activity; GO:0016684 oxidoreductase activity, acting on peroxide as acceptor;	PF00141	Peroxidase
P42730	AT1G74310	Chaperone protein ClpB1 OS=Arabidopsis thaliana OX=3702 GN=CLPB1 PE=1 SV=2	CLPB1	0.753	0.0109144	Down	101.2	3	2	4	1	1.141	1.128	1.154	0.935	0.756	0.886	cytoplasm	K03695	clpB; ATP-dependent Clp protease ATP-binding subunit ClpB		GO:0000302 response to reactive oxygen species; GO:0006417 regulation of translation; GO:0006950 response to stress; GO:0006979 response to oxidative stress; GO:0009266 response to temperature stimulus; GO:0009314 response to radiation; GO:0009408 response to heat; GO:0009416 response to light stimulus; GO:0009628 response to abiotic stimulus; GO:0009636 response to toxic substance; GO:0009642 re…	GO:0005622 intracellular; GO:0005623 cell; GO:0005737 cytoplasm; GO:0009507 chloroplast; GO:0009526 plastid envelope; GO:0009532 plastid stroma; GO:0009536 plastid; GO:0009570 chloroplast stroma; GO:0009941 chloroplast envelope; GO:0031967 organelle envelope; GO:0031975 envelope; GO:0043226 organelle; GO:0043227 membrane-bounded organelle; GO:0043229 intracellular organelle; GO:0043231 intracellu…		PF00004; PF07724; PF10431	ATPase family associated with various cellular activities (AAA); AAA domain (Cdc48 subfamily); C-terminal, D2-small domain, of ClpB protein	O	KOG1051	Chaperone HSP104 and related ATP-dependent Clp proteases
P50700	AT4G11650	Osmotin-like protein OSM34 OS=Arabidopsis thaliana OX=3702 GN=OSM34 PE=2 SV=2	OSM34	0.769	0.0282366	Down	26.6	17	3	4	3	1.086	1.198	1.106	0.747	0.924	0.937	chloroplast				GO:0002376 immune system process; GO:0006950 response to stress; GO:0006952 defense response; GO:0006955 immune response; GO:0006970 response to osmotic stress; GO:0009605 response to external stimulus; GO:0009607 response to biotic stimulus; GO:0009617 response to bacterium; GO:0009620 response to fungus; GO:0009628 response to abiotic stimulus; GO:0009651 response to salt stress; GO:0009814 def…	GO:0005622 intracellular; GO:0005623 cell; GO:0005737 cytoplasm; GO:0044424 intracellular part; GO:0044464 cell part;		PF00314	Thaumatin family
Q0WPN7	AT5G65810	Probable pectin methylesterase CGR3 OS=Arabidopsis thaliana OX=3702 GN=CGR3 PE=2 SV=1	CGR3	0.669	0.00406729	Down	28.3	17	4	7	3	1.173	1.23	1.096	0.692	0.841	0.808	chloroplast				GO:0000271 polysaccharide biosynthetic process; GO:0005975 carbohydrate metabolic process; GO:0005976 polysaccharide metabolic process; GO:0007275 multicellular organism development; GO:0008152 metabolic process; GO:0009058 biosynthetic process; GO:0009059 macromolecule biosynthetic process; GO:0009653 anatomical structure morphogenesis; GO:0009664 plant-type cell wall organization; GO:0009832 pl…	GO:0000139 Golgi membrane; GO:0005622 intracellular; GO:0005623 cell; GO:0005737 cytoplasm; GO:0005768 endosome; GO:0005773 vacuole; GO:0005774 vacuolar membrane; GO:0005794 Golgi apparatus; GO:0005802 trans-Golgi network; GO:0005886 plasma membrane; GO:0009507 chloroplast; GO:0009534 chloroplast thylakoid; GO:0009535 chloroplast thylakoid membrane; GO:0009536 plastid; GO:0009579 thylakoid; GO:00…
Q38890	AT5G49720	Endoglucanase 25 OS=Arabidopsis thaliana OX=3702 GN=KOR PE=1 SV=1	KOR	0.523	0.000369605	Down	69.1	7	4	7	3	1.32	1.234	1.35	0.745	0.673	0.623	nucleus	K01179	E3.2.1.4; endoglucanase [EC:3.2.1.4]	map00500 Starch and sucrose metabolism; map01100 Metabolic pathways	GO:0000226 microtubule cytoskeleton organization; GO:0000271 polysaccharide biosynthetic process; GO:0000902 cell morphogenesis; GO:0005975 carbohydrate metabolic process; GO:0005976 polysaccharide metabolic process; GO:0006073 cellular glucan metabolic process; GO:0006950 response to stress; GO:0006970 response to osmotic stress; GO:0006972 hyperosmotic response; GO:0006996 organelle organizatio…	GO:0005622 intracellular; GO:0005623 cell; GO:0005737 cytoplasm; GO:0005768 endosome; GO:0005769 early endosome; GO:0005794 Golgi apparatus; GO:0005802 trans-Golgi network; GO:0005886 plasma membrane; GO:0009504 cell plate; GO:0012505 endomembrane system; GO:0016020 membrane; GO:0031410 cytoplasmic vesicle; GO:0031982 vesicle; GO:0031984 organelle subcompartment; GO:0043226 organelle; GO:0043227 …	GO:0003824 catalytic activity; GO:0004553 hydrolase activity, hydrolyzing O-glycosyl compounds; GO:0008810 cellulase activity; GO:0016787 hydrolase activity; GO:0016798 hydrolase activity, acting on glycosyl bonds;	PF00759	Glycosyl hydrolase family 9
Q39061	AT3G52380	RNA-binding protein CP33, chloroplastic OS=Arabidopsis thaliana OX=3702 GN=CP33 PE=2 SV=1	CP33	0.683	0.0362314	Down	35.7	20	4	6	4	1.372	1.13	1.092	0.953	0.831	0.67	chloroplast	K11294	NCL, NSR1; nucleolin		GO:0006139 nucleobase-containing compound metabolic process; GO:0006364 rRNA processing; GO:0006396 RNA processing; GO:0006725 cellular aromatic compound metabolic process; GO:0006807 nitrogen compound metabolic process; GO:0008152 metabolic process; GO:0009987 cellular process; GO:0010467 gene expression; GO:0016070 RNA metabolic process; GO:0016072 rRNA metabolic process; GO:0022613 ribonucleop…	GO:0005622 intracellular; GO:0005623 cell; GO:0005737 cytoplasm; GO:0009507 chloroplast; GO:0009532 plastid stroma; GO:0009536 plastid; GO:0009570 chloroplast stroma; GO:0009579 thylakoid; GO:0043226 organelle; GO:0043227 membrane-bounded organelle; GO:0043229 intracellular organelle; GO:0043231 intracellular membrane-bounded organelle; GO:0044422 organelle part; GO:0044424 intracellular part; GO…	GO:0003676 nucleic acid binding; GO:0003723 RNA binding; GO:0003729 mRNA binding; GO:0005488 binding; GO:0097159 organic cyclic compound binding; GO:1901363 heterocyclic compound binding;	PF00076	RNA recognition motif. (a.k.a. RRM, RBD, or RNP domain)	A	KOG0118	FOG: RRM domain
Q39253	AT2G38170	Vacuolar cation/proton exchanger 1 OS=Arabidopsis thaliana OX=3702 GN=CAX1 PE=1 SV=3	CAX1	0.719	0.0266016	Down	50.1	3	1	1	1	1.055	1.132	1.303	0.81	0.957	0.744	plasma membrane	K07300	chaA, CAX; Ca2+:H+ antiporter		GO:0006810 transport; GO:0006811 ion transport; GO:0006812 cation transport; GO:0006816 calcium ion transport; GO:0006873 cellular ion homeostasis; GO:0006875 cellular metal ion homeostasis; GO:0006882 cellular zinc ion homeostasis; GO:0006950 response to stress; GO:0006970 response to osmotic stress; GO:0009266 response to temperature stimulus; GO:0009409 response to cold; GO:0009628 response to…	GO:0000325 plant-type vacuole; GO:0005622 intracellular; GO:0005623 cell; GO:0005737 cytoplasm; GO:0005773 vacuole; GO:0005774 vacuolar membrane; GO:0009705 plant-type vacuole membrane; GO:0016020 membrane; GO:0031090 organelle membrane; GO:0043226 organelle; GO:0043227 membrane-bounded organelle; GO:0043229 intracellular organelle; GO:0043231 intracellular membrane-bounded organelle; GO:0044422 …	GO:0005215 transporter activity; GO:0008324 cation transmembrane transporter activity; GO:0015075 ion transmembrane transporter activity; GO:0015077 monovalent inorganic cation transmembrane transporter activity; GO:0015078 hydrogen ion transmembrane transporter activity; GO:0015085 calcium ion transmembrane transporter activity; GO:0015291 secondary active transmembrane transporter activity; GO:…			P	KOG1397	Ca2+/H+ antiporter VCX1 and related proteins
Q41188	AT4G38680	Cold shock protein 2 OS=Arabidopsis thaliana OX=3702 GN=CSP2 PE=1 SV=1	CSP2	0.616	6.66877e-05	Down	19.1	29	3	4	2	1.202	1.235	1.275	0.731	0.789	0.768	nucleus				GO:0000003 reproduction; GO:0001101 response to acid chemical; GO:0003006 developmental process involved in reproduction; GO:0006950 response to stress; GO:0006996 organelle organization; GO:0007275 multicellular organism development; GO:0009266 response to temperature stimulus; GO:0009269 response to desiccation; GO:0009409 response to cold; GO:0009414 response to water deprivation; GO:0009415 r…	GO:0005622 intracellular; GO:0005623 cell; GO:0005634 nucleus; GO:0005730 nucleolus; GO:0005737 cytoplasm; GO:0005829 cytosol; GO:0005886 plasma membrane; GO:0016020 membrane; GO:0031974 membrane-enclosed lumen; GO:0031981 nuclear lumen; GO:0043226 organelle; GO:0043227 membrane-bounded organelle; GO:0043228 non-membrane-bounded organelle; GO:0043229 intracellular organelle; GO:0043231 intracellu…	GO:0003676 nucleic acid binding; GO:0003677 DNA binding; GO:0003690 double-stranded DNA binding; GO:0003697 single-stranded DNA binding; GO:0003723 RNA binding; GO:0003729 mRNA binding; GO:0005488 binding; GO:0097159 organic cyclic compound binding; GO:1901363 heterocyclic compound binding;	PF00313; PF00098	'Cold-shock' DNA-binding domain; Zinc knuckle	J	KOG3070	Predicted RNA-binding protein containing PIN domain and invovled in translation or RNA processing
Q84JK1	AT1G70200	RNA-binding (RRM/RBD/RNP motifs) family protein OS=Arabidopsis thaliana OX=3702 GN=At1g70200 PE=2 SV=1	At1g70200	0.763	0.0210789	Down	60.3	5	3	3	3	1.088	1.166	1.181	0.999	0.823	0.799	chloroplast
Q93Z04	AT3G54920	Probable pectate lyase 13 OS=Arabidopsis thaliana OX=3702 GN=PMR6 PE=1 SV=1	PMR6	0.693	0.0472749	Down	53.9	6	2	2	2	1.329	1.073	1.143	0.643	0.944	0.869	vacuolar membrane	K01728	pel; pectate lyase [EC:4.2.2.2]	map00040 Pentose and glucuronate interconversions; map01100 Metabolic pathways	GO:0002376 immune system process; GO:0006950 response to stress; GO:0006952 defense response; GO:0006955 immune response; GO:0009605 response to external stimulus; GO:0009607 response to biotic stimulus; GO:0009814 defense response, incompatible interaction; GO:0009825 multidimensional cell growth; GO:0009987 cellular process; GO:0016043 cellular component organization; GO:0016049 cell growth; GO…	GO:0005623 cell; GO:0005886 plasma membrane; GO:0016020 membrane; GO:0031224 intrinsic component of membrane; GO:0031225 anchored component of membrane; GO:0031226 intrinsic component of plasma membrane; GO:0044425 membrane part; GO:0044459 plasma membrane part; GO:0044464 cell part; GO:0046658 anchored component of plasma membrane; GO:0071944 cell periphery;	GO:0003824 catalytic activity; GO:0016829 lyase activity; GO:0016835 carbon-oxygen lyase activity; GO:0016837 carbon-oxygen lyase activity, acting on polysaccharides; GO:0030570 pectate lyase activity;	PF00544	Pectate lyase
Q941L0	AT5G05170	Cellulose synthase A catalytic subunit 3 [UDP-forming] OS=Arabidopsis thaliana OX=3702 GN=CESA3 PE=1 SV=2	CESA3	0.743	0.00439991	Down	119.6	14	12	22	12	1.113	1.115	1.156	0.924	0.792	0.798	plasma membrane	K10999	CESA; cellulose synthase A [EC:2.4.1.12]		GO:0000271 polysaccharide biosynthetic process; GO:0000278 mitotic cell cycle; GO:0000281 mitotic cytokinesis; GO:0000910 cytokinesis; GO:0005975 carbohydrate metabolic process; GO:0005976 polysaccharide metabolic process; GO:0006073 cellular glucan metabolic process; GO:0006950 response to stress; GO:0006952 defense response; GO:0007049 cell cycle; GO:0008152 metabolic process; GO:0009058 biosyn…	GO:0005622 intracellular; GO:0005623 cell; GO:0005737 cytoplasm; GO:0005768 endosome; GO:0005794 Golgi apparatus; GO:0005802 trans-Golgi network; GO:0005886 plasma membrane; GO:0005911 cell-cell junction; GO:0009506 plasmodesma; GO:0012505 endomembrane system; GO:0016020 membrane; GO:0030054 cell junction; GO:0031410 cytoplasmic vesicle; GO:0031982 vesicle; GO:0031984 organelle subcompartment; GO…	GO:0003824 catalytic activity; GO:0016740 transferase activity; GO:0016757 transferase activity, transferring glycosyl groups; GO:0016758 transferase activity, transferring hexosyl groups; GO:0016759 cellulose synthase activity; GO:0046527 glucosyltransferase activity;
Q949U1	AT1G16410	Dihomomethionine N-hydroxylase OS=Arabidopsis thaliana OX=3702 GN=CYP79F1 PE=1 SV=1	CYP79F1	0.69	0.00101751	Down	61.7	9	5	9	4	1.173	1.15	1.204	0.775	0.88	0.78	chloroplast	K12154	CYP79F1; homomethionine N-monooxygenase [EC:1.14.14.42]	map00966 Glucosinolate biosynthesis; map01110 Biosynthesis of secondary metabolites; map01210 2-Oxocarboxylic acid metabolism	GO:0001101 response to acid chemical; GO:0002229 defense response to oomycetes; GO:0002239 response to oomycetes; GO:0002376 immune system process; GO:0002682 regulation of immune system process; GO:0002831 regulation of response to biotic stimulus; GO:0006082 organic acid metabolic process; GO:0006520 cellular amino acid metabolic process; GO:0006568 tryptophan metabolic process; GO:0006569 tryp…	GO:0005622 intracellular; GO:0005623 cell; GO:0005737 cytoplasm; GO:0005783 endoplasmic reticulum; GO:0012505 endomembrane system; GO:0016020 membrane; GO:0043226 organelle; GO:0043227 membrane-bounded organelle; GO:0043229 intracellular organelle; GO:0043231 intracellular membrane-bounded organelle; GO:0044424 intracellular part; GO:0044444 cytoplasmic part; GO:0044464 cell part;	GO:0003824 catalytic activity; GO:0004497 monooxygenase activity; GO:0016491 oxidoreductase activity; GO:0016705 oxidoreductase activity, acting on paired donors, with incorporation or reduction of molecular oxygen; GO:0016709 oxidoreductase activity, acting on paired donors, with incorporation or reduction of molecular oxygen, NAD(P)H as one donor, and incorporation of one atom of oxygen;	PF00067	Cytochrome P450	Q	KOG0156	Cytochrome P450 CYP2 subfamily
Q94AA3	AT3G09210	AT3g09210/F3L24_8 OS=Arabidopsis thaliana OX=3702 GN=PTAC13 PE=2 SV=1	PTAC13	0.684	0.019076	Down	37.5	4	1	2	1	0.977	1.251	1.335	0.837	0.777	0.823	cytoplasm							PF02357	Transcription termination factor nusG
Q94EJ6	AT4G18030	Probable methyltransferase PMT14 OS=Arabidopsis thaliana OX=3702 GN=At4g18030 PE=2 SV=1	At4g18030	0.665	0.000866319	Down	70.3	18	11	19	11	1.172	1.166	1.218	0.822	0.822	0.721	plasma membrane				GO:0008152 metabolic process; GO:0032259 methylation;	GO:0005618 cell wall; GO:0005622 intracellular; GO:0005623 cell; GO:0005737 cytoplasm; GO:0005768 endosome; GO:0005773 vacuole; GO:0005774 vacuolar membrane; GO:0005794 Golgi apparatus; GO:0005802 trans-Golgi network; GO:0009505 plant-type cell wall; GO:0012505 endomembrane system; GO:0016020 membrane; GO:0030312 external encapsulating structure; GO:0031090 organelle membrane; GO:0031410 cytoplas…	GO:0003824 catalytic activity; GO:0008168 methyltransferase activity; GO:0008757 S-adenosylmethionine-dependent methyltransferase activity; GO:0016740 transferase activity; GO:0016741 transferase activity, transferring one-carbon groups;
Q9C6B9	AT1G73600	Phosphoethanolamine N-methyltransferase 3 OS=Arabidopsis thaliana OX=3702 GN=NMT3 PE=2 SV=2	NMT3	0.731	0.00390262	Down	56.3	30	14	27	11	1.186	1.189	1.113	0.93	0.826	0.792	cytoplasm	K05929	E2.1.1.103, NMT; phosphoethanolamine N-methyltransferase [EC:2.1.1.103]	map00564 Glycerophospholipid metabolism	GO:0000003 reproduction; GO:0000902 cell morphogenesis; GO:0000904 cell morphogenesis involved in differentiation; GO:0001505 regulation of neurotransmitter levels; GO:0003006 developmental process involved in reproduction; GO:0006576 cellular biogenic amine metabolic process; GO:0006629 lipid metabolic process; GO:0006644 phospholipid metabolic process; GO:0006650 glycerophospholipid metabolic p…	GO:0005622 intracellular; GO:0005623 cell; GO:0005737 cytoplasm; GO:0005829 cytosol; GO:0044424 intracellular part; GO:0044444 cytoplasmic part; GO:0044464 cell part;	GO:0003824 catalytic activity; GO:0008168 methyltransferase activity; GO:0008170 N-methyltransferase activity; GO:0008757 S-adenosylmethionine-dependent methyltransferase activity; GO:0016740 transferase activity; GO:0016741 transferase activity, transferring one-carbon groups; GO:0052667 phosphomethylethanolamine N-methyltransferase activity;	PF08241; PF13847	Methyltransferase domain; Methyltransferase domain	I	KOG1269	SAM-dependent methyltransferases
Q9C8Y9	AT1G66280	Beta-glucosidase 22 OS=Arabidopsis thaliana OX=3702 GN=BGLU22 PE=1 SV=1	BGLU22	0.699	0.000173491	Down	59.7	13	7	25	2	1.164	1.169	1.2	0.802	0.802	0.864	vacuolar membrane	K01188	E3.2.1.21; beta-glucosidase [EC:3.2.1.21]	map00460 Cyanoamino acid metabolism; map00500 Starch and sucrose metabolism; map00940 Phenylpropanoid biosynthesis; map01100 Metabolic pathways; map01110 Biosynthesis of secondary metabolites	GO:0001101 response to acid chemical; GO:0002376 immune system process; GO:0006066 alcohol metabolic process; GO:0006082 organic acid metabolic process; GO:0006629 lipid metabolic process; GO:0006714 sesquiterpenoid metabolic process; GO:0006720 isoprenoid metabolic process; GO:0006721 terpenoid metabolic process; GO:0006725 cellular aromatic compound metabolic process; GO:0006790 sulfur compound…	GO:0005622 intracellular; GO:0005623 cell; GO:0005634 nucleus; GO:0005737 cytoplasm; GO:0005773 vacuole; GO:0005777 peroxisome; GO:0005783 endoplasmic reticulum; GO:0005788 endoplasmic reticulum lumen; GO:0005911 cell-cell junction; GO:0009506 plasmodesma; GO:0009507 chloroplast; GO:0009526 plastid envelope; GO:0009536 plastid; GO:0009941 chloroplast envelope; GO:0010168 ER body; GO:0012505 endom…	GO:0002020 protease binding; GO:0003824 catalytic activity; GO:0004553 hydrolase activity, hydrolyzing O-glycosyl compounds; GO:0005488 binding; GO:0005507 copper ion binding; GO:0005515 protein binding; GO:0008422 beta-glucosidase activity; GO:0015926 glucosidase activity; GO:0015928 fucosidase activity; GO:0016787 hydrolase activity; GO:0016798 hydrolase activity, acting on glycosyl bonds; GO:0…	PF00232	Glycosyl hydrolase family 1	G	KOG0626	Beta-glucosidase, lactase phlorizinhydrolase, and related proteins
Q9C9E6	AT1G72480	Lung seven transmembrane receptor family protein OS=Arabidopsis thaliana OX=3702 GN=At1g72480 PE=4 SV=1	At1g72480	0.715	0.00250008	Down	57.4	2	1	2	1	1.158	1.141	1.2	0.913	0.808	0.78	plasma membrane					GO:0000139 Golgi membrane; GO:0005622 intracellular; GO:0005623 cell; GO:0005737 cytoplasm; GO:0005794 Golgi apparatus; GO:0005795 Golgi stack; GO:0012505 endomembrane system; GO:0016020 membrane; GO:0031090 organelle membrane; GO:0031984 organelle subcompartment; GO:0031985 Golgi cisterna; GO:0032580 Golgi cisterna membrane; GO:0043226 organelle; GO:0043227 membrane-bounded organelle; GO:0043229…				S	KOG2568	Predicted membrane protein
Q9C9Z9	AT3G08550	Glycosyltransferase-like KOBITO 1 OS=Arabidopsis thaliana OX=3702 GN=ELD1 PE=1 SV=1	ELD1	0.747	3.30268e-05	Down	59.9	2	1	2	1	1.172	1.146	1.117	0.852	0.86	0.853	mitochondria				GO:0000271 polysaccharide biosynthetic process; GO:0000902 cell morphogenesis; GO:0001101 response to acid chemical; GO:0005975 carbohydrate metabolic process; GO:0005976 polysaccharide metabolic process; GO:0006073 cellular glucan metabolic process; GO:0006109 regulation of carbohydrate metabolic process; GO:0007275 multicellular organism development; GO:0008152 metabolic process; GO:0009058 bio…	GO:0005618 cell wall; GO:0005622 intracellular; GO:0005623 cell; GO:0005737 cytoplasm; GO:0005768 endosome; GO:0005794 Golgi apparatus; GO:0005802 trans-Golgi network; GO:0005886 plasma membrane; GO:0009505 plant-type cell wall; GO:0012505 endomembrane system; GO:0016020 membrane; GO:0030312 external encapsulating structure; GO:0031410 cytoplasmic vesicle; GO:0031982 vesicle; GO:0031984 organelle…		PF01697	Glycosyltransferase family 92
Q9FDZ9	AT1G57660	60S ribosomal protein L21-2 OS=Arabidopsis thaliana OX=3702 GN=RPL21E PE=2 SV=1	RPL21E	0.745	0.00935661	Down	18.7	18	4	8	4	1.145	1.125	1.132	0.955	0.795	0.785	cytoplasm	K02889	RP-L21e, RPL21; large subunit ribosomal protein L21e	map03010 Ribosome	GO:0006412 translation; GO:0006518 peptide metabolic process; GO:0006807 nitrogen compound metabolic process; GO:0008152 metabolic process; GO:0009058 biosynthetic process; GO:0009059 macromolecule biosynthetic process; GO:0009987 cellular process; GO:0010467 gene expression; GO:0019538 protein metabolic process; GO:0034641 cellular nitrogen compound metabolic process; GO:0034645 cellular macromo…	GO:0005622 intracellular; GO:0005623 cell; GO:0005634 nucleus; GO:0005730 nucleolus; GO:0005737 cytoplasm; GO:0005829 cytosol; GO:0005840 ribosome; GO:0009507 chloroplast; GO:0009536 plastid; GO:0015934 large ribosomal subunit; GO:0022625 cytosolic large ribosomal subunit; GO:0022626 cytosolic ribosome; GO:0031974 membrane-enclosed lumen; GO:0031981 nuclear lumen; GO:0032991 macromolecular comple…	GO:0003735 structural constituent of ribosome; GO:0005198 structural molecule activity;			J	KOG1732	60S ribosomal protein L21
Q9FHI9	AT5G45470	Transmembrane protein, putative (DUF594) OS=Arabidopsis thaliana OX=3702 GN=MFC19.14 PE=2 SV=1	MFC19.14	0.611	0.00745726	Down	100.1	2	2	3	2	1.248	1.262	1.214	0.916	0.69	0.67	cytoplasm
Q9FL12	AT5G40200	Protease Do-like 9 OS=Arabidopsis thaliana OX=3702 GN=DEGP9 PE=1 SV=1	DEGP9	0.769	0.0395523	Down	65.1	7	4	5	4	1.175	1.113	1.124	1.035	0.789	0.8	nucleus				GO:0006508 proteolysis; GO:0006807 nitrogen compound metabolic process; GO:0008152 metabolic process; GO:0019538 protein metabolic process; GO:0043170 macromolecule metabolic process; GO:0044238 primary metabolic process; GO:0071704 organic substance metabolic process; GO:1901564 organonitrogen compound metabolic process;	GO:0005622 intracellular; GO:0005623 cell; GO:0005634 nucleus; GO:0005730 nucleolus; GO:0005737 cytoplasm; GO:0009507 chloroplast; GO:0009536 plastid; GO:0031974 membrane-enclosed lumen; GO:0031981 nuclear lumen; GO:0043226 organelle; GO:0043227 membrane-bounded organelle; GO:0043228 non-membrane-bounded organelle; GO:0043229 intracellular organelle; GO:0043231 intracellular membrane-bounded orga…	GO:0003824 catalytic activity; GO:0008233 peptidase activity; GO:0008236 serine-type peptidase activity; GO:0016787 hydrolase activity; GO:0017171 serine hydrolase activity; GO:0070011 peptidase activity, acting on L-amino acid peptides;	PF13365; PF13180	Trypsin-like peptidase domain; PDZ domain	O	KOG1320	Serine protease
Q9FLI4	AT5G51750	Subtilisin-like protease SBT1.3 OS=Arabidopsis thaliana OX=3702 GN=SBT1.3 PE=2 SV=1	SBT1.3	0.735	0.029536	Down	84.9	1	1	2	1	1.173	1.142	1.144	1.015	0.775	0.752	chloroplast				GO:0006508 proteolysis; GO:0006807 nitrogen compound metabolic process; GO:0008152 metabolic process; GO:0019538 protein metabolic process; GO:0043170 macromolecule metabolic process; GO:0044238 primary metabolic process; GO:0071704 organic substance metabolic process; GO:1901564 organonitrogen compound metabolic process;		GO:0003824 catalytic activity; GO:0004175 endopeptidase activity; GO:0004252 serine-type endopeptidase activity; GO:0008233 peptidase activity; GO:0008236 serine-type peptidase activity; GO:0016787 hydrolase activity; GO:0017171 serine hydrolase activity; GO:0070011 peptidase activity, acting on L-amino acid peptides;	PF05922; PF00082	Peptidase inhibitor I9; Subtilase family
Q9FR44	AT3G18000	Phosphoethanolamine N-methyltransferase 1 OS=Arabidopsis thaliana OX=3702 GN=NMT1 PE=1 SV=1	NMT1	0.589	0.00105584	Down	56.1	34	14	36	7	1.196	1.205	1.273	0.756	0.769	0.638	nucleus	K05929	E2.1.1.103, NMT; phosphoethanolamine N-methyltransferase [EC:2.1.1.103]	map00564 Glycerophospholipid metabolism	GO:0000003 reproduction; GO:0000902 cell morphogenesis; GO:0000904 cell morphogenesis involved in differentiation; GO:0001505 regulation of neurotransmitter levels; GO:0003006 developmental process involved in reproduction; GO:0006576 cellular biogenic amine metabolic process; GO:0006629 lipid metabolic process; GO:0006644 phospholipid metabolic process; GO:0006650 glycerophospholipid metabolic p…	GO:0005622 intracellular; GO:0005623 cell; GO:0005737 cytoplasm; GO:0005829 cytosol; GO:0044424 intracellular part; GO:0044444 cytoplasmic part; GO:0044464 cell part;	GO:0003824 catalytic activity; GO:0008168 methyltransferase activity; GO:0008170 N-methyltransferase activity; GO:0008757 S-adenosylmethionine-dependent methyltransferase activity; GO:0016740 transferase activity; GO:0016741 transferase activity, transferring one-carbon groups; GO:0052667 phosphomethylethanolamine N-methyltransferase activity;	PF08241; PF13489	Methyltransferase domain; Methyltransferase domain	I	KOG1269	SAM-dependent methyltransferases
Q9FUY7	AT1G16400	Hexahomomethionine N-hydroxylase OS=Arabidopsis thaliana OX=3702 GN=CYP79F2 PE=1 SV=2	CYP79F2	0.753	0.00385662	Down	61.4	7	3	5	2	1.043	1.188	1.148	0.877	0.804	0.862	chloroplast	K12155	CYP79F2; homomethionine N-monooxygenase [EC:1.14.14.42]	map00966 Glucosinolate biosynthesis; map01210 2-Oxocarboxylic acid metabolism	GO:0001101 response to acid chemical; GO:0002229 defense response to oomycetes; GO:0002239 response to oomycetes; GO:0002376 immune system process; GO:0002682 regulation of immune system process; GO:0002831 regulation of response to biotic stimulus; GO:0006082 organic acid metabolic process; GO:0006520 cellular amino acid metabolic process; GO:0006568 tryptophan metabolic process; GO:0006569 tryp…	GO:0005622 intracellular; GO:0005623 cell; GO:0005737 cytoplasm; GO:0005783 endoplasmic reticulum; GO:0012505 endomembrane system; GO:0016020 membrane; GO:0043226 organelle; GO:0043227 membrane-bounded organelle; GO:0043229 intracellular organelle; GO:0043231 intracellular membrane-bounded organelle; GO:0044424 intracellular part; GO:0044444 cytoplasmic part; GO:0044464 cell part;	GO:0003824 catalytic activity; GO:0004497 monooxygenase activity; GO:0016491 oxidoreductase activity; GO:0016705 oxidoreductase activity, acting on paired donors, with incorporation or reduction of molecular oxygen; GO:0016709 oxidoreductase activity, acting on paired donors, with incorporation or reduction of molecular oxygen, NAD(P)H as one donor, and incorporation of one atom of oxygen;	PF00067	Cytochrome P450	Q	KOG0156	Cytochrome P450 CYP2 subfamily
Q9FWA4	AT3G02350	Probable galacturonosyltransferase 9 OS=Arabidopsis thaliana OX=3702 GN=GAUT9 PE=2 SV=1	GAUT9	0.733	5.11539e-05	Down	64.1	7	4	7	3	1.153	1.157	1.155	0.82	0.853	0.868	chloroplast	K13648	GAUT; alpha-1,4-galacturonosyltransferase [EC:2.4.1.43]	map00520 Amino sugar and nucleotide sugar metabolism; map01100 Metabolic pathways		GO:0005622 intracellular; GO:0005623 cell; GO:0005737 cytoplasm; GO:0005768 endosome; GO:0005794 Golgi apparatus; GO:0005802 trans-Golgi network; GO:0012505 endomembrane system; GO:0031410 cytoplasmic vesicle; GO:0031982 vesicle; GO:0031984 organelle subcompartment; GO:0043226 organelle; GO:0043227 membrane-bounded organelle; GO:0043229 intracellular organelle; GO:0043231 intracellular membrane-b…	GO:0003824 catalytic activity; GO:0008194 UDP-glycosyltransferase activity; GO:0016740 transferase activity; GO:0016757 transferase activity, transferring glycosyl groups; GO:0016758 transferase activity, transferring hexosyl groups; GO:0047262 polygalacturonate 4-alpha-galacturonosyltransferase activity;
Q9LFR0	AT5G14950	Alpha-mannosidase 2 OS=Arabidopsis thaliana OX=3702 GN=GMII PE=1 SV=1	GMII	0.767	0.0246816	Down	134.6	5	6	9	6	1.094	1.146	1.166	0.956	0.908	0.748	chloroplast	K01231	MAN2; alpha-mannosidase II [EC:3.2.1.114]	map00510 N-Glycan biosynthesis; map00513 Various types of N-glycan biosynthesis; map01100 Metabolic pathways	GO:0005975 carbohydrate metabolic process; GO:0005996 monosaccharide metabolic process; GO:0006013 mannose metabolic process; GO:0006464 cellular protein modification process; GO:0006486 protein glycosylation; GO:0006487 protein N-linked glycosylation; GO:0006491 N-glycan processing; GO:0006517 protein deglycosylation; GO:0006807 nitrogen compound metabolic process; GO:0006950 response to stress;…	GO:0000139 Golgi membrane; GO:0005622 intracellular; GO:0005623 cell; GO:0005737 cytoplasm; GO:0005768 endosome; GO:0005794 Golgi apparatus; GO:0005802 trans-Golgi network; GO:0012505 endomembrane system; GO:0016020 membrane; GO:0031090 organelle membrane; GO:0031410 cytoplasmic vesicle; GO:0031982 vesicle; GO:0031984 organelle subcompartment; GO:0043226 organelle; GO:0043227 membrane-bounded org…	GO:0003824 catalytic activity; GO:0004553 hydrolase activity, hydrolyzing O-glycosyl compounds; GO:0004559 alpha-mannosidase activity; GO:0004572 mannosyl-oligosaccharide 1,3-1,6-alpha-mannosidase activity; GO:0015923 mannosidase activity; GO:0015924 mannosyl-oligosaccharide mannosidase activity; GO:0016787 hydrolase activity; GO:0016798 hydrolase activity, acting on glycosyl bonds;	PF01074; PF09261; PF07748	Glycosyl hydrolases family 38 N-terminal domain; Alpha mannosidase, middle domain; Glycosyl hydrolases family 38 C-terminal domain	G	KOG1959	Glycosyl hydrolase, family 38 - alpha-mannosidase
Q9LJX0	AT3G28860	ABC transporter B family member 19 OS=Arabidopsis thaliana OX=3702 GN=ABCB19 PE=1 SV=1	ABCB19	0.735	0.00292729	Down	136.7	9	10	12	9	1.135	1.158	1.174	0.928	0.825	0.794	plasma membrane	K05658	ABCB1, CD243; ATP-binding cassette, subfamily B (MDR/TAP), member 1 [EC:7.6.2.2]	map02010 ABC transporters	GO:0000003 reproduction; GO:0003006 developmental process involved in reproduction; GO:0006810 transport; GO:0007275 multicellular organism development; GO:0008361 regulation of cell size; GO:0009314 response to radiation; GO:0009411 response to UV; GO:0009416 response to light stimulus; GO:0009605 response to external stimulus; GO:0009606 tropism; GO:0009628 response to abiotic stimulus; GO:0009…	GO:0005623 cell; GO:0005886 plasma membrane; GO:0016020 membrane; GO:0044464 cell part; GO:0071944 cell periphery;	GO:0005215 transporter activity; GO:0010329 auxin efflux transmembrane transporter activity; GO:0015562 efflux transmembrane transporter activity; GO:0022857 transmembrane transporter activity; GO:0080161 auxin transmembrane transporter activity;	PF00005	ABC transporter	Q	KOG0055	Multidrug/pheromone exporter, ABC superfamily
Q9LSG3	AT3G25140	Galacturonosyltransferase 8 OS=Arabidopsis thaliana OX=3702 GN=GAUT8 PE=1 SV=1	GAUT8	0.764	0.000766023	Down	64.3	11	6	8	5	1.109	1.15	1.108	0.862	0.895	0.817	chloroplast	K13648	GAUT; alpha-1,4-galacturonosyltransferase [EC:2.4.1.43]	map00520 Amino sugar and nucleotide sugar metabolism; map01100 Metabolic pathways	GO:0000271 polysaccharide biosynthetic process; GO:0005975 carbohydrate metabolic process; GO:0005976 polysaccharide metabolic process; GO:0008152 metabolic process; GO:0009058 biosynthetic process; GO:0009059 macromolecule biosynthetic process; GO:0009664 plant-type cell wall organization; GO:0009832 plant-type cell wall biogenesis; GO:0009987 cellular process; GO:0010289 homogalacturonan biosyn…	GO:0005622 intracellular; GO:0005623 cell; GO:0005737 cytoplasm; GO:0005739 mitochondrion; GO:0005768 endosome; GO:0005794 Golgi apparatus; GO:0005802 trans-Golgi network; GO:0012505 endomembrane system; GO:0031410 cytoplasmic vesicle; GO:0031982 vesicle; GO:0031984 organelle subcompartment; GO:0043226 organelle; GO:0043227 membrane-bounded organelle; GO:0043229 intracellular organelle; GO:004323…	GO:0003824 catalytic activity; GO:0008194 UDP-glycosyltransferase activity; GO:0016740 transferase activity; GO:0016757 transferase activity, transferring glycosyl groups; GO:0016758 transferase activity, transferring hexosyl groups; GO:0047262 polygalacturonate 4-alpha-galacturonosyltransferase activity;
Q9LT02	AT5G23630	Probable manganese-transporting ATPase PDR2 OS=Arabidopsis thaliana OX=3702 GN=PDR2 PE=1 SV=1	PDR2	0.745	0.0308991	Down	131	9	12	15	12	1.14	1.149	1.14	1.016	0.772	0.766	chloroplast	K14950	ATP13A1, SPF1; manganese-transporting P-type ATPase [EC:7.2.2.-]		GO:0000003 reproduction; GO:0001709 cell fate determination; GO:0006810 transport; GO:0006811 ion transport; GO:0006812 cation transport; GO:0006816 calcium ion transport; GO:0006873 cellular ion homeostasis; GO:0006874 cellular calcium ion homeostasis; GO:0006875 cellular metal ion homeostasis; GO:0006950 response to stress; GO:0007154 cell communication; GO:0007275 multicellular organism develo…	GO:0005622 intracellular; GO:0005623 cell; GO:0005737 cytoplasm; GO:0005783 endoplasmic reticulum; GO:0005886 plasma membrane; GO:0005887 integral component of plasma membrane; GO:0012505 endomembrane system; GO:0016020 membrane; GO:0016021 integral component of membrane; GO:0031224 intrinsic component of membrane; GO:0031226 intrinsic component of plasma membrane; GO:0043226 organelle; GO:004322…	GO:0003824 catalytic activity; GO:0005215 transporter activity; GO:0005388 calcium-transporting ATPase activity; GO:0008324 cation transmembrane transporter activity; GO:0015075 ion transmembrane transporter activity; GO:0015085 calcium ion transmembrane transporter activity; GO:0015318 inorganic solute uptake transmembrane transporter activity; GO:0015399 primary active transmembrane transporter…	PF00702	haloacid dehalogenase-like hydrolase	P	KOG0209	P-type ATPase
Q9LU14	AT3G16370	GDSL esterase/lipase APG OS=Arabidopsis thaliana OX=3702 GN=APG PE=2 SV=1	APG	0.657	0.00471475	Down	38.2	23	7	12	7	1.229	1.184	1.18	0.675	0.839	0.845	extracellular					GO:0005576 extracellular region; GO:0048046 apoplast;				L	KOG0017	FOG: Transposon-encoded proteins with TYA, reverse transcriptase, integrase domains in various combinations
Q9LUM3	AT3G14240	Subtilisin-like protease SBT1.5 OS=Arabidopsis thaliana OX=3702 GN=SBT1.5 PE=2 SV=1	SBT1.5	0.757	0.00133735	Down	82.5	5	3	3	3	1.098	1.195	1.122	0.884	0.88	0.821	chloroplast							PF05922; PF00082	Peptidase inhibitor I9; Subtilase family
Q9LXS2	AT3G58800	Secretion-regulating guanine nucleotide exchange factor OS=Arabidopsis thaliana OX=3702 GN=T20N10_150 PE=2 SV=1	T20N10_150	0.742	0.00547328	Down	39	2	1	1	1	1.209	1.118	1.118	0.927	0.784	0.844	plasma membrane
Q9LYW9	AT5G03160	DnaJ protein P58IPK homolog OS=Arabidopsis thaliana OX=3702 GN=P58IPK PE=1 SV=1	P58IPK	0.726	0.0160532	Down	53.7	14	6	10	6	1.136	1.161	1.139	0.97	0.746	0.779	endoplasmic reticulum	K09523	DNAJC3; DnaJ homolog subfamily C member 3	map04141 Protein processing in endoplasmic reticulum	GO:0035821 modification of morphology or physiology of other organism; GO:0043900 regulation of multi-organism process; GO:0043902 positive regulation of multi-organism process; GO:0043903 regulation of symbiosis, encompassing mutualism through parasitism; GO:0044403 symbiosis, encompassing mutualism through parasitism; GO:0044419 interspecies interaction between organisms; GO:0044788 modulation …	GO:0005622 intracellular; GO:0005623 cell; GO:0005737 cytoplasm; GO:0005783 endoplasmic reticulum; GO:0005788 endoplasmic reticulum lumen; GO:0005886 plasma membrane; GO:0012505 endomembrane system; GO:0016020 membrane; GO:0031974 membrane-enclosed lumen; GO:0043226 organelle; GO:0043227 membrane-bounded organelle; GO:0043229 intracellular organelle; GO:0043231 intracellular membrane-bounded orga…		PF00226	DnaJ domain	O	KOG0550	Molecular chaperone (DnaJ superfamily)
Q9LZ72	AT5G04530	3-ketoacyl-CoA synthase 19 OS=Arabidopsis thaliana OX=3702 GN=KCS19 PE=2 SV=1	KCS19	0.768	0.000557905	Down	52.6	9	4	6	4	1.15	1.135	1.115	0.913	0.841	0.857	chloroplast	K15397	KCS; 3-ketoacyl-CoA synthase [EC:2.3.1.199]	map00062 Fatty acid elongation; map01100 Metabolic pathways; map01110 Biosynthesis of secondary metabolites; map04626 Plant-pathogen interaction	GO:0006950 response to stress; GO:0009266 response to temperature stimulus; GO:0009314 response to radiation; GO:0009409 response to cold; GO:0009416 response to light stimulus; GO:0009628 response to abiotic stimulus; GO:0050896 response to stimulus;			PF08541	3-Oxoacyl-[acyl-carrier-protein (ACP)] synthase III C terminal
Q9LZJ5	AT3G62700	ABC transporter C family member 14 OS=Arabidopsis thaliana OX=3702 GN=ABCC14 PE=1 SV=1	ABCC14	0.755	0.0271037	Down	172	6	8	8	4	1.106	1.163	1.155	1.01	0.795	0.781	plasma membrane	K05666	ABCC2; ATP-binding cassette, subfamily C (CFTR/MRP), member 2	map02010 ABC transporters	GO:0001101 response to acid chemical; GO:0006810 transport; GO:0006855 drug transmembrane transport; GO:0006950 response to stress; GO:0009414 response to water deprivation; GO:0009415 response to water; GO:0009605 response to external stimulus; GO:0009607 response to biotic stimulus; GO:0009611 response to wounding; GO:0009624 response to nematode; GO:0009628 response to abiotic stimulus; GO:000…	GO:0000325 plant-type vacuole; GO:0005622 intracellular; GO:0005623 cell; GO:0005737 cytoplasm; GO:0005773 vacuole; GO:0005774 vacuolar membrane; GO:0005794 Golgi apparatus; GO:0005886 plasma membrane; GO:0005911 cell-cell junction; GO:0009506 plasmodesma; GO:0012505 endomembrane system; GO:0016020 membrane; GO:0030054 cell junction; GO:0031090 organelle membrane; GO:0043226 organelle; GO:0043227…	GO:0003824 catalytic activity; GO:0005215 transporter activity; GO:0015399 primary active transmembrane transporter activity; GO:0015405 P-P-bond-hydrolysis-driven transmembrane transporter activity; GO:0016462 pyrophosphatase activity; GO:0016787 hydrolase activity; GO:0016817 hydrolase activity, acting on acid anhydrides; GO:0016818 hydrolase activity, acting on acid anhydrides, in phosphorus-c…	PF00005	ABC transporter	Q	KOG0054	Multidrug resistance-associated protein/mitoxantrone resistance protein, ABC superfamily
Q9M0A0	AT4G30600	AT4g30600/F17I23_60 OS=Arabidopsis thaliana OX=3702 GN=At4g30600 PE=2 SV=1	At4g30600	0.656	0.00201912	Down	69.5	9	6	8	6	1.223	1.224	1.158	0.877	0.762	0.727	chloroplast	K13431	SRPR; signal recognition particle receptor subunit alpha	map03060 Protein export				PF02881; PF00448	SRP54-type protein, helical bundle domain; SRP54-type protein, GTPase domain	U	KOG0781	Signal recognition particle receptor, alpha subunit
Q9M9M4	AT3G03050	Cellulose synthase-like protein D3 OS=Arabidopsis thaliana OX=3702 GN=CSLD3 PE=1 SV=1	CSLD3	0.668	0.00210458	Down	128.5	4	4	7	2	1.218	1.204	1.176	0.883	0.793	0.726	plasma membrane	K20924	CSLD; cellulose synthase-like protein [EC:2.4.1.-]		GO:0006950 response to stress; GO:0007275 multicellular organism development; GO:0008152 metabolic process; GO:0009266 response to temperature stimulus; GO:0009409 response to cold; GO:0009628 response to abiotic stimulus; GO:0009653 anatomical structure morphogenesis; GO:0009888 tissue development; GO:0009987 cellular process; GO:0010015 root morphogenesis; GO:0010053 root epidermal cell differe…	GO:0000139 Golgi membrane; GO:0005622 intracellular; GO:0005623 cell; GO:0005737 cytoplasm; GO:0005768 endosome; GO:0005783 endoplasmic reticulum; GO:0005794 Golgi apparatus; GO:0005802 trans-Golgi network; GO:0005886 plasma membrane; GO:0012505 endomembrane system; GO:0016020 membrane; GO:0016021 integral component of membrane; GO:0030173 integral component of Golgi membrane; GO:0031090 organell…	GO:0000030 mannosyltransferase activity; GO:0003824 catalytic activity; GO:0016740 transferase activity; GO:0016757 transferase activity, transferring glycosyl groups; GO:0016758 transferase activity, transferring hexosyl groups; GO:0019187 beta-1,4-mannosyltransferase activity; GO:0051753 mannan synthase activity;
Q9SB81	AT4G21960	Peroxidase 42 OS=Arabidopsis thaliana OX=3702 GN=PER42 PE=1 SV=2	PER42	0.69	0.00153116	Down	37.3	31	7	12	7	1.133	1.216	1.216	0.817	0.761	0.881	extracellular	K00430	E1.11.1.7; peroxidase [EC:1.11.1.7]	map00940 Phenylpropanoid biosynthesis; map01100 Metabolic pathways; map01110 Biosynthesis of secondary metabolites	GO:0008152 metabolic process; GO:0009636 response to toxic substance; GO:0009664 plant-type cell wall organization; GO:0009987 cellular process; GO:0016043 cellular component organization; GO:0042221 response to chemical; GO:0045229 external encapsulating structure organization; GO:0050896 response to stimulus; GO:0051716 cellular response to stimulus; GO:0055114 oxidation-reduction process; GO:0…	GO:0005618 cell wall; GO:0005623 cell; GO:0005911 cell-cell junction; GO:0009505 plant-type cell wall; GO:0009506 plasmodesma; GO:0030054 cell junction; GO:0030312 external encapsulating structure; GO:0044464 cell part; GO:0055044 symplast; GO:0071944 cell periphery;	GO:0003824 catalytic activity; GO:0004601 peroxidase activity; GO:0016209 antioxidant activity; GO:0016491 oxidoreductase activity; GO:0016684 oxidoreductase activity, acting on peroxide as acceptor;	PF00141	Peroxidase
Q9SGP2	AT1G28440	Receptor-like protein kinase HSL1 OS=Arabidopsis thaliana OX=3702 GN=HSL1 PE=2 SV=1	HSL1	0.758	0.0216219	Down	108.9	3	2	2	2	1.092	1.08	1.241	0.956	0.772	0.86	plasma membrane	K00924	E2.7.1.-; kinase [EC:2.7.1.-]		GO:0000003 reproduction; GO:0000272 polysaccharide catabolic process; GO:0003006 developmental process involved in reproduction; GO:0005975 carbohydrate metabolic process; GO:0005976 polysaccharide metabolic process; GO:0006464 cellular protein modification process; GO:0006468 protein phosphorylation; GO:0006793 phosphorus metabolic process; GO:0006796 phosphate-containing compound metabolic proc…	GO:0005623 cell; GO:0005886 plasma membrane; GO:0016020 membrane; GO:0044464 cell part; GO:0071944 cell periphery;	GO:0003824 catalytic activity; GO:0004672 protein kinase activity; GO:0016301 kinase activity; GO:0016740 transferase activity; GO:0016772 transferase activity, transferring phosphorus-containing groups; GO:0016773 phosphotransferase activity, alcohol group as acceptor;	PF00069	Protein kinase domain
Q9SIC8	AT2G31410	Coiled-coil protein OS=Arabidopsis thaliana OX=3702 GN=At2g31410 PE=2 SV=1	At2g31410	0.7	0.0365298	Down	22.7	19	2	2	2	1.087	1.234	1.208	1.018	0.726	0.728	nucleus
Q9SID2	AT2G31360	Delta-9 acyl-lipid desaturase 2 OS=Arabidopsis thaliana OX=3702 GN=ADS2 PE=2 SV=2	ADS2	0.597	0.0145434	Down	36.4	4	1	1	1	1.109	1.562	1.087	0.792	0.709	0.741	cytoplasm	K23119	ADS2; very-long-chain acyl-lipid omega-9 desaturase [EC:1.14.19.75]		GO:0000038 very long-chain fatty acid metabolic process; GO:0006082 organic acid metabolic process; GO:0006629 lipid metabolic process; GO:0006631 fatty acid metabolic process; GO:0006633 fatty acid biosynthetic process; GO:0006636 unsaturated fatty acid biosynthetic process; GO:0008152 metabolic process; GO:0008610 lipid biosynthetic process; GO:0009058 biosynthetic process; GO:0009987 cellular …	GO:0005622 intracellular; GO:0005623 cell; GO:0005737 cytoplasm; GO:0005783 endoplasmic reticulum; GO:0005789 endoplasmic reticulum membrane; GO:0012505 endomembrane system; GO:0016020 membrane; GO:0031984 organelle subcompartment; GO:0042175 nuclear outer membrane-endoplasmic reticulum membrane network; GO:0043226 organelle; GO:0043227 membrane-bounded organelle; GO:0043229 intracellular organel…	GO:0003824 catalytic activity; GO:0016491 oxidoreductase activity;	PF00487	Fatty acid desaturase	I	KOG1600	Fatty acid desaturase
Q9STW1	AT4G24330	At4g24330 OS=Arabidopsis thaliana OX=3702 GN=At4g24330 PE=2 SV=1	At4g24330	0.644	0.0111263	Down	53.9	5	2	3	2	1.19	1.275	1.183	0.943	0.71	0.698	plasma membrane					GO:0005622 intracellular; GO:0005623 cell; GO:0005737 cytoplasm; GO:0005783 endoplasmic reticulum; GO:0012505 endomembrane system; GO:0043226 organelle; GO:0043227 membrane-bounded organelle; GO:0043229 intracellular organelle; GO:0043231 intracellular membrane-bounded organelle; GO:0044424 intracellular part; GO:0044444 cytoplasmic part; GO:0044464 cell part;	GO:0005488 binding; GO:0005509 calcium ion binding; GO:0043167 ion binding; GO:0043169 cation binding; GO:0046872 metal ion binding;			O	KOG2357	Uncharacterized conserved protein
Q9XF43	AT1G68530	3-ketoacyl-CoA synthase 6 OS=Arabidopsis thaliana OX=3702 GN=CUT1 PE=1 SV=1	CUT1	0.74	0.00280532	Down	56.4	9	4	6	2	1.154	1.146	1.147	0.785	0.846	0.921	plasma membrane	K15397	KCS; 3-ketoacyl-CoA synthase [EC:2.3.1.199]	map00062 Fatty acid elongation; map01100 Metabolic pathways; map01110 Biosynthesis of secondary metabolites; map04626 Plant-pathogen interaction	GO:0000003 reproduction; GO:0000902 cell morphogenesis; GO:0003006 developmental process involved in reproduction; GO:0006950 response to stress; GO:0008152 metabolic process; GO:0009058 biosynthetic process; GO:0009266 response to temperature stimulus; GO:0009314 response to radiation; GO:0009409 response to cold; GO:0009416 response to light stimulus; GO:0009628 response to abiotic stimulus; GO…	GO:0005622 intracellular; GO:0005623 cell; GO:0005737 cytoplasm; GO:0005783 endoplasmic reticulum; GO:0012505 endomembrane system; GO:0016020 membrane; GO:0043226 organelle; GO:0043227 membrane-bounded organelle; GO:0043229 intracellular organelle; GO:0043231 intracellular membrane-bounded organelle; GO:0044424 intracellular part; GO:0044444 cytoplasmic part; GO:0044464 cell part;	GO:0003824 catalytic activity; GO:0004312 fatty acid synthase activity; GO:0009922 fatty acid elongase activity; GO:0016740 transferase activity; GO:0016746 transferase activity, transferring acyl groups; GO:0016747 transferase activity, transferring acyl groups other than amino-acyl groups;	PF08541	3-Oxoacyl-[acyl-carrier-protein (ACP)] synthase III C terminal
Q9XGM3	AT5G45250	Disease resistance protein RPS4 OS=Arabidopsis thaliana OX=3702 GN=RPS4 PE=1 SV=1	RPS4	0.692	0.0451345	Down	137.6	1	1	1	1	1.229	1.15	1.167	0.977	0.625	0.852	nucleus	K16226	RPS4; disease resistance protein RPS4	map04626 Plant-pathogen interaction	GO:0002218 activation of innate immune response; GO:0002252 immune effector process; GO:0002253 activation of immune response; GO:0002376 immune system process; GO:0002682 regulation of immune system process; GO:0002684 positive regulation of immune system process; GO:0006950 response to stress; GO:0006952 defense response; GO:0006955 immune response; GO:0007154 cell communication; GO:0007165 sig…	GO:0005622 intracellular; GO:0005623 cell; GO:0005634 nucleus; GO:0012505 endomembrane system; GO:0016020 membrane; GO:0043226 organelle; GO:0043227 membrane-bounded organelle; GO:0043229 intracellular organelle; GO:0043231 intracellular membrane-bounded organelle; GO:0044424 intracellular part; GO:0044464 cell part;	GO:0005488 binding; GO:0005515 protein binding; GO:0042802 identical protein binding;	PF00931	NB-ARC domain
Q9ZR72	AT2G36910	ABC transporter B family member 1 OS=Arabidopsis thaliana OX=3702 GN=ABCB1 PE=1 SV=1	ABCB1	0.718	0.0494416	Down	140.5	5	4	4	3	1.13	1.26	1.101	1.036	0.761	0.711	plasma membrane	K05658	ABCB1, CD243; ATP-binding cassette, subfamily B (MDR/TAP), member 1 [EC:7.6.2.2]	map02010 ABC transporters	GO:0000003 reproduction; GO:0003006 developmental process involved in reproduction; GO:0006810 transport; GO:0007275 multicellular organism development; GO:0008361 regulation of cell size; GO:0009314 response to radiation; GO:0009411 response to UV; GO:0009416 response to light stimulus; GO:0009605 response to external stimulus; GO:0009606 tropism; GO:0009607 response to biotic stimulus; GO:00096…	GO:0005623 cell; GO:0005886 plasma membrane; GO:0005911 cell-cell junction; GO:0009506 plasmodesma; GO:0016020 membrane; GO:0030054 cell junction; GO:0044464 cell part; GO:0055044 symplast; GO:0071944 cell periphery;	GO:0003824 catalytic activity; GO:0005215 transporter activity; GO:0010328 auxin influx transmembrane transporter activity; GO:0010329 auxin efflux transmembrane transporter activity; GO:0015399 primary active transmembrane transporter activity; GO:0015405 P-P-bond-hydrolysis-driven transmembrane transporter activity; GO:0015562 efflux transmembrane transporter activity; GO:0016462 pyrophosphatas…	PF00005	ABC transporter	Q	KOG0055	Multidrug/pheromone exporter, ABC superfamily
Q9ZSU4	AT4G25820	Xyloglucan endotransglucosylase/hydrolase protein 14 OS=Arabidopsis thaliana OX=3702 GN=XTH14 PE=1 SV=1	XTH14	0.665	0.0168621	Down	32.7	7	2	3	2	1.17	1.37	1.063	0.712	0.775	0.91	extracellular	K08235	E2.4.1.207; xyloglucan:xyloglucosyl transferase [EC:2.4.1.207]					PF00722	Glycosyl hydrolases family 16
