# Supplementary material for: Quantitative Proteomic Analysis of ER Stress Response Reveals both Common and Specific Features in Two Contrasting Ecotypes of Arabidopsis thaliana
Source: Int J Mol Sci. 2020 Dec 21;21(24):9741. doi: 10.3390/ijms21249741 (PMC7766468; doi:10.3390/ijms21249741)
Supplement: Supplementary file 1 [file ijms-21-09741-s001.zip › Table S2.xlsx]

## Sheet: UP
Table S2. Gene descriptions for different clusters of differentially regulated proteins in Col, Ler and DM plants.
					16	30	33	9	89	3	10
					AT1G27330	AT1G02930	AT1G02920	AT1G33960	AT1G01470	AT2G24980	AT1G43910
					AT1G56340	AT1G04980	AT1G09180	AT2G18660	AT1G03040	AT2G29740	AT1G49570
					AT1G65720	AT1G09080	AT1G14360	AT2G23810	AT1G12200	AT5G25250	AT2G26560
					AT1G72280	AT1G09210	AT1G15520	AT2G44080	AT1G12440		AT2G40880
					AT2G02810	AT1G18830	AT1G73630	AT3G05500	AT1G19770		AT2G41100
					AT3G12250	AT1G21750	AT1G74710	AT3G19390	AT1G23130		AT3G03640
					AT3G16990	AT1G29060	AT1G76970	AT5G13200	AT1G24340		AT4G12720
					AT3G20920	AT1G56580	AT2G02800	AT5G13320	AT1G26090		AT4G16660
					AT3G51000	AT1G77510	AT2G04450	AT5G25940	AT1G30270		AT5G17760
					AT4G29960	AT2G03120	AT2G16900		AT1G31940		AT5G47120
					AT5G19250	AT2G25110	AT2G19460		AT1G47960
					AT5G24590	AT2G32920	AT2G29380		AT1G48320
					AT5G35080	AT2G47470	AT2G40140		AT1G54320
					AT5G44120	AT3G05200	AT2G43550		AT1G55450
					AT5G55730	AT3G08970	AT2G44370		AT1G63290
					AT5G64400	AT3G13410	AT2G45300		AT1G65310
						AT3G24090	AT3G07390		AT1G72010
						AT3G51980	AT3G47820		AT1G72940
						AT3G54960	AT3G48090		AT1G76360
						AT3G62600	AT3G52400		AT1G76760
						AT4G14420	AT4G01020		AT1G78200
						AT4G24190	AT4G08410		AT1G78290
						AT4G29520	AT4G19840		AT1G78340
						AT5G03160	AT4G20860		AT1G80110
						AT5G03320	AT4G21810		AT1G80930
						AT5G07340	AT4G24690		AT2G02230
						AT5G28540	AT5G02780		AT2G04780
						AT5G42020	AT5G18470		AT2G05230
						AT5G61790	AT5G23575		AT2G19790
						AT5G64510	AT5G25260		AT2G21640
							AT5G57220		AT2G31200
							AT5G57480		AT2G38330
							AT5G58320		AT2G41090
									AT2G42540
									AT2G46600
									AT3G01290
									AT3G06110
									AT3G07370
									AT3G09270
									AT3G11210
									AT3G11700
									AT3G15770
									AT3G21770
									AT3G22370
									AT3G24500
									AT3G29240
									AT3G49620
									AT3G50480
									AT3G52430
									AT3G54680
									AT3G57130
									AT3G57785
									AT3G61470
									AT3G62680
									AT4G15780
									AT4G17090
									AT4G17230
									AT4G17530
									AT4G24160
									AT4G25810
									AT4G28300
									AT4G30270
									AT4G30280
									AT4G34131
									AT4G38410
									AT5G01040
									AT5G06320
									AT5G07900
									AT5G10300
									AT5G11920
									AT5G11970
									AT5G15870
									AT5G15970
									AT5G16010
									AT5G37070
									AT5G37770
									AT5G42050
									AT5G43450
									AT5G44130
									AT5G46190
									AT5G47070
									AT5G47870
									AT5G54540
									AT5G57560
									AT5G58005
									AT5G58070
									AT5G60620
									AT5G61160
									AT5G61390

## Sheet: Gene Descriptions for up-reg
Table S2. Gene descriptions for different clusters of differentially regulated proteins in Col, Ler and DM plants.
16
Locus Identifier	Gene Model Name	Gene Model Description	Gene Model Type	Primary Gene Symbol	All Gene Symbols
AT1G27330	AT1G27330.1	Ribosome associated membrane protein RAMP4;(source:Araport11)	protein_coding
AT1G56340	AT1G56340.1	Encodes one of three Arabidopsis calreticulins. In CRT-deficient mouse fibroblasts, this protein restores ER Ca2+ levels. Post-transcriptionally regulates together with CRT2 VAMP721/722 levels under ER stress. Loss-of-function results in activation of the ethylene signaling pathway, reduced susceptibility to Verticillium longisporum.	protein_coding	CALRETICULIN 1A (CRT1a)	CALRETICULIN 1A (CRT1a);CALRETICULIN 1 (CRT1); (AtCRT1a)
AT1G65720	AT1G65720.1	transmembrane protein;(source:Araport11)	protein_coding
AT1G72280	AT1G72280.1	Encodes an oxidoreductin required for oxidative protein folding in the ER and exists in two distinct oxidized isoforms (Ox1 and Ox2), which are determined by the formation or breakage of the putative regulatory disulfide. AtERO1 is mainly present in the Ox1 redox state.	protein_coding	ENDOPLASMIC RETICULUM OXIDOREDUCTINS 1 (ERO1)	ENDOPLASMIC RETICULUM OXIDOREDUCTINS 1 (ERO1);ENDOPLASMIC RETICULUM OXIDOREDUCTINS 1 (AERO1)
AT2G02810	AT2G02810.1	Encodes a multitransmembrane hydrophobic protein that functions as transporter of UDP-galactose and UDP-glucose into the Golgi. Localized in the ER. Involved in the unfolded protein response, a mechanism that controls proper protein folding in the ER.	protein_coding	UDP-GALACTOSE TRANSPORTER 1 (UTR1)	UDP-GALACTOSE TRANSPORTER 1 (UTR1);UDP-GALACTOSE TRANSPORTER 1 (ATUTR1)
AT3G12250	AT3G12250.4	basic leucine zipper transcription factor involved in the activation of SA-responsive genes.	protein_coding	TGACG MOTIF-BINDING FACTOR 6 (TGA6)	(BZIP45);TGACG MOTIF-BINDING FACTOR 6 (TGA6)
AT3G16990	AT3G16990.1	heme oxygenase-like, multi-helical;(source:Araport11)	protein_coding
AT3G20920	AT3G20920.1	Encodes an endoplasmic reticulum localized protein with similarity to yeast Sec62p. Mutants display growth defects and significantly reduced fertility. AtSec62 does not complement the thermosensitive phenotype of yeast Sec62 mutants.	protein_coding	(ATSEC62)	(ATSEC62)
AT3G51000	AT3G51000.1	alpha/beta-Hydrolases superfamily protein;(source:Araport11)	protein_coding
AT4G29960	AT4G29960.1	EBS7 encodes a plant specific, endoplasmic reticulum localized protein that is involved in endoplasmic reticulum-associated degradation (ERAD). It interacts with the ERAD component AtHRD1a and may regulate HRD1a stability. Identified in a screen for supressors of a mutation in bri1 that causes bri1 to be retained in the ER. Loss of EBS7 function restores BR sensitivity in the bri1-9 mutant allele.	protein_coding	ETHYL METHANESULFONATE-MUTAGENIZED BRASSINOSTEROID- INSENSITIVE 1 SUPPRESSOR 7 (EBS7)	ETHYL METHANESULFONATE-MUTAGENIZED BRASSINOSTEROID- INSENSITIVE 1 SUPPRESSOR 7 (EBS7)
AT5G19250	AT5G19250.1	Glycoprotein membrane precursor GPI-anchored;(source:Araport11)	protein_coding
AT5G24590	AT5G24590.2	Member of NAc protein family. Interacts with turnip crinkle virus (TCV) capsid protein. Transcription factor involved in regulating the defense response of Arabidopsis to TCV.	protein_coding	TCV-INTERACTING PROTEIN (TIP)	ARABIDOPSIS NAC DOMAIN CONTAINING PROTEIN 91 (ANAC091);TCV-INTERACTING PROTEIN (TIP); (ANAC91)
AT5G35080	AT5G35080.1	Encodes a protein involved in the endoplasmic reticulum-associated degradation of glycoproteins.	protein_coding	OS9 (OS9)	(ATOS9);OS9 (OS9)
AT5G44120	AT5G44120.3	Encodes a 12S seed storage protein. The Landsberg erecta genome contains another copy of 12S globulin gene, CRA2, which is located tandemly with CRA1. Protein is tyrosine-phosphorylated and its phosphorylation state is modulated in response to ABA in Arabidopsis thaliana seeds.	protein_coding	CRUCIFERINA (CRA1)	CRUCIFERINA (CRA1); (CRU1);CRUCIFERINA (ATCRA1)
AT5G55730	AT5G55730.1	Encodes fasciclin-like arabinogalactan-protein 1 (Fla1). fla1 mutants show defects in shoot regeneration. Possibly involved in embryogenesis and seed development.	protein_coding	FASCICLIN-LIKE ARABINOGALACTAN 1 (FLA1)	FASCICLIN-LIKE ARABINOGALACTAN 1 (FLA1)
AT5G64400	AT5G64400.2	CHCH domain protein;(source:Araport11) involved in mechanotransduction. Loss of both At12cys-1 and At12cys-2 lead to enhanced tolerance to drought and light stress and increased anti-oxidant capacity.	protein_coding	(AT12CYS-1)	(AT12CYS-1)
3
Locus Identifier	Gene Model Name	Gene Model Description	Gene Model Type	Primary Gene Symbol	All Gene Symbols
AT5G25250	AT5G25250.1	Encodes a protein that is involved in a membrane microdomain-dependent, but clathrin-independent, endocytic pathway required for optimal seedling development. The mRNA is cell-to-cell mobile.	protein_coding	FLOTILLIN 1 (FLOT1)	FLOTILLIN 1 (FLOT1)
AT2G29740	AT2G29740.1	UDP-glucosyl transferase 71C2;(source:Araport11)	protein_coding	UDP-GLUCOSYL TRANSFERASE 71C2 (UGT71C2)	UDP-GLUCOSYL TRANSFERASE 71C2 (UGT71C2)
AT2G24980	AT2G24980.1	Proline-rich extensin-like family protein;(source:Araport11)	EXTENSIN 6 (EXT6)	EXTENSIN 6 (EXT6)
30
Locus Identifier	Gene Model Name	Gene Model Description	Gene Model Type	Primary Gene Symbol	All Gene Symbols
AT4G14420	AT4G14420.1	HR-like lesion-inducing protein-like protein;(source:Araport11)	protein_coding
AT3G13410	AT3G13410.1	2-C-methyl-D-erythritol 4-phosphate cytidylyltransferase;(source:Araport11)	protein_coding
AT5G07340	AT5G07340.2	Calreticulin family protein;(source:Araport11)	protein_coding
AT3G51980	AT3G51980.1	ARM repeat superfamily protein;(source:Araport11)	protein_coding
AT3G08970	AT3G08970.1	J domain protein localized in ER lumen. Can compensate for the growth defect in jem1 scj1 mutant yeast. Also shows similarity to HSP40 proteins and is induced by heat stress. At high temperatures, mutant alleles are not transmitted through the pollen due to defects in pollen tube growth.	protein_coding	(ATERDJ3A)	THERMOSENSITIVE MALE STERILE 1 (TMS1); (ATERDJ3A)
AT3G62600	AT3G62600.1	J domain protein localized in ER lumen. Can partially compensate for the growth defect in jem1 scj1 mutant yeast. Forms a complex SDF2-ERdj3B-BiP that is required for the proper accumulation of the surface-exposed leucine-rich repeat receptor kinases EFR. EFR is involved in PAMP (pathogen associated molecular patterns) triggered immunity.	protein_coding	(ATERDJ3B)	(ERDJ3B); (ATERDJ3B)
AT1G29060	AT1G29060.1	Encodes a golgi localized QcSNARE involved in response to salt and osmotic stress. Overexpression confers increased resistance to NaCl, mannitol and LiCl. SFT12 may act by mediating vacuolar sequestration of NaCl and other ions.	protein_coding	(ATSFT12)	(ATSFT12)
AT5G28540	AT5G28540.1	Encodes the luminal binding protein BiP, an ER-localized member of the HSP70 family. BiP is composed of an N-terminal ATP binding domain and a C-terminal domain that binds to hydrophobic patches on improperly/incompletely folded proteins in an ATP-dependent manner. Involved in polar nuclei fusion during proliferation of endosperm nuclei.	protein_coding	(BIP1)	(BIP1)
AT5G42020	AT5G42020.1	Luminal binding protein (BiP2) involved in polar nuclei fusion during proliferation of endosperm nuclei.	protein_coding	(BIP2)	(BIP2);LUMINAL BINDING PROTEIN (BIP)
AT1G18830	AT1G18830.1	Together with SEC31B a component of the coat protein complex II (COPII) which promotes the formation of transport vesicles from the endoplasmic reticulum (ER).	protein_coding	(SEC31A)	(SEC31A)
AT3G05200	AT3G05200.1	Encodes a putative RING-H2 zinc finger protein ATL6 (ATL6). The mRNA is cell-to-cell mobile.	protein_coding	ARABIDOPSIS TOXICOS EN LEVADURA 6 (ATL6)	ARABIDOPSIS TOXICOS EN LEVADURA 6 (ATL6)
AT1G09080	AT1G09080.1	Heat shock protein 70 (Hsp 70) family protein;(source:Araport11)	protein_coding	BINDING PROTEIN 3 (BIP3)	BINDING PROTEIN 3 (BIP3)
AT5G61790	AT5G61790.1	calnexin 1;(source:Araport11)	protein_coding	CALNEXIN 1 (CNX1)	CALNEXIN 1 (CNX1); (CNX1); (ATCNX1)
AT1G09210	AT1G09210.1	Encodes one of three Arabidopsis calreticulins.Post-transcriptionally regulates together with CRT1 VAMP721/722 levels under ER stress.	protein_coding	CALRETICULIN 1B (CRT1b)	(AtCRT1b);CALRETICULIN 2 (CRT2);CALRETICULIN 1B (CRT1b)
AT1G02930	AT1G02930.1	Encodes glutathione transferase belonging to the phi class of GSTs. Naming convention according to Wagner et al. (2002).	protein_coding	GLUTATHIONE S-TRANSFERASE 6 (GSTF6)	ARABIDOPSIS THALIANA GLUATIONE S-TRANSFERASE F3 (ATGSTF3);GLUTATHIONE S-TRANSFERASE 6 (GSTF6);ARABIDOPSIS GLUTATHIONE S-TRANSFERASE 1 (ATGST1);EARLY RESPONSIVE TO DEHYDRATION 11 (ERD11);GLUTATHIONE S-TRANSFERASE 1 (GST1);GLUTATHIONE S-TRANSFERASE (ATGSTF6)
AT5G03160	AT5G03160.1	J domain protein localized in ER lumen. Can partially compensate for the growth defect in jem1 scj1 mutant yeast.	protein_coding	HOMOLOG OF MAMALLIAN P58IPK (P58IPK)	HOMOLOG OF MAMALLIAN P58IPK (P58IPK);HOMOLOG OF MAMALLIAN P58IPK (ATP58IPK)
AT3G24090	AT3G24090.1	Encodes a glutamine-fructose-6-phosphate transaminase that likely plays a role in UDP-N-acetylglucosamine biosynthesis.	protein_coding	L-GLUTAMINE D-FRUCTOSE-6-PHOSPHATE AMIDOTRANSFERASE (GFAT)	GLUTAMINE:FRUCTOSE-6-PHOSPHATE-AMIDOTRANSFERASE 1 (GFAT1);L-GLUTAMINE D-FRUCTOSE-6-PHOSPHATE AMIDOTRANSFERASE (GFAT)
AT5G03320	AT5G03320.1	Protein kinase superfamily protein;(source:Araport11)	protein_coding	PATTERN-TRIGGERED IMMUNITY COMPROMISED RECEPTOR-LIKE CYTOPLASMIC KINASE 2 (PCRK2)	PBS1-LIKE 40 (PBL40);PATTERN-TRIGGERED IMMUNITY COMPROMISED RECEPTOR-LIKE CYTOPLASMIC KINASE 2 (PCRK2)
AT1G21750	AT1G21750.1	Encodes a protein disulfide isomerase-like (PDIL) protein, a member of a multigene family within the thioredoxin (TRX) superfamily; isoform contains non-consensus GA donor splice site at intron 9. Transcript levels for this gene are up-regulated in response to three different chemical inducers of ER stress (dithiothreitol, beta-mercaptoethanol, and tunicamycin). Neither AtIRE1-2 nor AtbZIP60 appe…	protein_coding	PDI-LIKE 1-1 (PDIL1-1)	ARABIDOPSIS THALIANA PROTEIN DISULFIDE ISOMERASE 5 (ATPDI5);PDI-LIKE 1-1 (ATPDIL1-1);PROTEIN DISULFIDE ISOMERASE 5 (PDI5);PDI-LIKE 1-1 (PDIL1-1)
AT1G77510	AT1G77510.1	Encodes a protein disulfide isomerase-like (PDIL) protein, a member of a multigene family within the thioredoxin (TRX) superfamily. Transcript levels for this gene are up-regulated in response to three different chemical inducers of ER stress (dithiothreitol, beta-mercaptoethanol, and tunicamycin). AtIRE1-2 does not appear to be required for this response, but the atbzip60 mutant has a diminished…	protein_coding	PDI-LIKE 1-2 (PDIL1-2)	PROTEIN DISULFIDE ISOMERASE 6 (PDI6);PDI-LIKE 1-2 (ATPDIL1-2);PROTEIN DISULFIDE ISOMERASE 6 (ATPDI6);PDI-LIKE 1-2 (PDIL1-2)
AT3G54960	AT3G54960.1	Encodes a protein disulfide isomerase-like (PDIL) protein, a member of a multigene family within the thioredoxin (TRX) superfamily. Transcript levels for this gene are up-regulated in response to three different chemical inducers of ER stress (dithiothreitol, beta-mercaptoethanol, and tunicamycin). Neither AtIRE1-2 nor AtbZIP60 appear to be required for this response.	protein_coding	PDI-LIKE 1-3 (PDIL1-3)	PDI-LIKE 1-3 (ATPDIL1-3);PDI-LIKE 1-3 (PDIL1-3);ARABIDOPSIS THALIANA PROTEIN DISULFIDE ISOMERASE 1 (ATPDI1);PROTEIN DISULFIDE ISOMERASE 1 (PDI1)
AT1G04980	AT1G04980.1	Encodes a protein disulfide isomerase-like (PDIL) protein, a member of a multigene family within the thioredoxin (TRX) superfamily. Transcript levels for this gene are up-regulated in response to three different chemical inducers of ER stress (dithiothreitol, beta-mercaptoethanol, and tunicamycin). AtIRE1-2 does not appear to be required for this response, but the atbzip60 mutant has a diminished…	protein_coding	PDI-LIKE 2-2 (PDIL2-2)	PDI-LIKE 2-2 (ATPDIL2-2);PDI-LIKE 2-2 (PDIL2-2);PROTEIN DISULFIDE ISOMERASE (PDI10);ARABIDOPSIS THALIANA PROTEIN DISULFIDE ISOMERASE 10 (ATPDI10)
AT2G32920	AT2G32920.1	Encodes a protein disulfide isomerase-like (PDIL) protein, a member of a multigene family within the thioredoxin (TRX) superfamily. Transcript levels for this gene are up-regulated in response to three different chemical inducers of ER stress (dithiothreitol, beta-mercaptoethanol, and tunicamycin). AtIRE1-2 does not appear to be required for this response, but the atbzip60 mutant has a diminished…	protein_coding	PDI-LIKE 2-3 (PDIL2-3)	PDI-LIKE 2-3 (ATPDIL2-3);PROTEIN DISULFIDE ISOMERASE 9 (PDI9);PDI-LIKE 2-3 (PDIL2-3);ARABIDOPSIS THALIANA PROTEIN DISULFIDE ISOMERASE 9 (ATPDI9)
AT4G29520	AT4G29520.1	SES1 is an ER localized chaperone involved in salt and heat stress response.	protein_coding	SENSITIVE TO SALT1 (SES1)	SENSITIVE TO SALT1 (SES1)
AT4G24190	AT4G24190.1	encodes an ortholog of GRP94, an ER-resident HSP90-like protein and is involved in regulation of meristem size and organization. Single and double mutant analyses suggest that SHD may be required for the correct folding and/or complex formation of CLV proteins. Lines carrying recessive mutations in this locus exhibits expanded shoot meristems, disorganized root meristems, and defective pollen tub…	protein_coding	SHEPHERD (SHD)	HEAT SHOCK PROTEIN 90-7 (AtHsp90-7);HEAT SHOCK PROTEIN 90.7 (AtHsp90.7);HEAT SHOCK PROTEIN 90.7 (HSP90.7);SHEPHERD (SHD)
AT2G03120	AT2G03120.1	homologous to Signal Peptide Peptidases (SPP), required for pollen development and pollen germination. No homozygotes could be recovered from a T-DNA insertion mutant. The mRNA is cell-to-cell mobile.	protein_coding	SIGNAL PEPTIDE PEPTIDASE (SPP)	SIGNAL PEPTIDE PEPTIDASE (SPP);SIGNAL PEPTIDE PEPTIDASE (ATSPP)
AT1G56580	AT1G56580.1	Encodes SMALLER WITH VARIABLE BRANCHES (SVB), a protein with a conserved domain of unknown function (DUF538). The trichomes of the SVB mutants are smaller and exhibit branches of variable length and number.	protein_coding	SMALLER WITH VARIABLE BRANCHES (SVB)	SMALLER WITH VARIABLE BRANCHES (SVB)
AT2G25110	AT2G25110.1	Encodes an endoplasmic reticulum protein SDF2 (stromal-derived factor-2). Forms a complex SDF2-ERdj3B-BiP that is required for the proper accumulation of the surface-exposed leucine-rich repeat receptor kinases EFR. EFR is involved in PAMP (pathogen associated molecular patterns) triggered immunity.	protein_coding	STROMAL CELL-DERIVED FACTOR 2-LIKE PROTEIN PRECURSOR (SDF2)	STROMAL CELL-DERIVED FACTOR 2-LIKE PROTEIN PRECURSOR (SDF2);ARABIDOPSIS THALIANA STROMAL CELL-DERIVED FACTOR 2-LIKE PROTEIN PRECURSOR (AtSDF2);ATSDF2-LIKE (ATSDL)
AT5G64510	AT5G64510.1	Encodes Tunicamycin Induced 1(TIN1), a plant-speci_x001E_c ER stress-inducible protein. TIN1 mutation affects pollen surface morphology. Transcriptionally induced by treatment with the N-linked glyclsylation inhibitor tunicamycin.	protein_coding	TUNICAMYCIN INDUCED 1 (TIN1)	TUNICAMYCIN INDUCED 1 (TIN1)
AT2G47470	AT2G47470.1	Encodes a protein disulfide isomerase-like (PDIL) protein, a member of a multigene family within the thioredoxin (TRX) superfamily. Transcript levels for this gene are up-regulated in response to three different chemical inducers of ER stress (dithiothreitol, beta-mercaptoethanol, and tunicamycin). AtIRE1-2 does not appear to be required for this response, but the atbzip60 mutant has a diminished…	protein_coding	UNFERTILIZED EMBRYO SAC 5 (UNE5)	PDI-LIKE 2-1 (ATPDIL2-1);UNFERTILIZED EMBRYO SAC 5 (UNE5);MATERNAL EFFECT EMBRYO ARREST 30 (MEE30);ARABIDOPSIS THALIANA PROTEIN DISULFIDE ISOMERASE 11 (ATPDI11);PROTEIN DISULFIDE ISOMERASE 11 (PDI11)
10
Locus Identifier	Gene Model Name	Gene Model Description	Gene Model Type	Primary Gene Symbol	All Gene Symbols
AT5G17760	AT5G17760.1	P-loop containing nucleoside triphosphate hydrolases superfamily protein;(source:Araport11)	protein_coding
AT1G49570	AT1G49570.1	Peroxidase superfamily protein;(source:Araport11)	protein_coding
AT1G43910	AT1G43910.1	P-loop containing nucleoside triphosphate hydrolases superfamily protein;(source:Araport11)	protein_coding
AT4G12720	AT4G12720.4	Encodes a protein with ADP-ribose hydrolase activity. Negatively regulates EDS1-conditioned plant defense and programmed cell death.	protein_coding	(NUDT7)	(NUDT7);GROWTH FACTOR GENE 1 (GFG1);ARABIDOPSIS THALIANA NUDIX HYDROLASE HOMOLOG 7 (AtNUDT7)
AT5G47120	AT5G47120.1	Encodes BI-1, a homolog of mammalian Bax inhibitor 1. Functions as an attenuator of biotic and abiotic types of cell death. Bax-induced cell death can be downregulated by ectopically expressing AtBI in planta. The mRNA is cell-to-cell mobile.	protein_coding	BAX INHIBITOR 1 (BI1)	ARABIDOPSIS BAX INHIBITOR 1 (ATBI-1);BAX INHIBITOR 1 (BI1);BAX INHIBITOR 1 (ATBI1); (BI-1)
AT3G03640	AT3G03640.1	Encodes beta-glucosidase (GLUC).	protein_coding	BETA GLUCOSIDASE 25 (BGLU25)	BETA GLUCOSIDASE 25 (BGLU25); (GLUC)
AT2G40880	AT2G40880.1	Encodes a protein with cysteine proteinase inhibitor activity. Overexpression increases tolerance to abiotic stressors (i.e.salt,osmotic, cold stress). The mRNA is cell-to-cell mobile.	protein_coding	CYSTATIN A (CYSA)	(FL3-27);CYSTATIN A (CYSA);CYSTATIN A (ATCYSA)
AT4G16660	AT4G16660.1	heat shock protein 70 (Hsp 70) family protein;(source:Araport11)	protein_coding	HEAT SHOCK PROTEIN 70 (HSP70)	HEAT SHOCK PROTEIN 70 (HSP70)
AT2G26560	AT2G26560.1	Encodes a lipid acyl hydrolase with wide substrate specificity that accumulates upon infection by fungal and bacterial pathogens. Protein is localized in the cytoplasm in healthy leaves, and in membranes in infected cells. Plays a role in cell death and differentially affects the accumulation of oxylipins. Contributes to resistance to virus.	protein_coding	PHOSPHOLIPASE A 2A (PLA2A)	PHOSPHOLIPASE A 2A (PLP2); (PLAII ALPHA);PATATIN-LIKE PROTEIN 2 (PLP2);PHOSPHOLIPASE A 2A (PLA IIA);PHOSPHOLIPASE A 2A (PLA2A)
AT2G41100	AT2G41100.1	encodes a calmodulin-like protein, with six potential calcium binding domains. Calcium binding shown by Ca(2+)-specific shift in electrophoretic mobility. Expression induced by touch and darkness. Expression may also be developmentally controlled. Expression in growing regions of roots, vascular tissue, root/shoot junctions, trichomes, branch points of the shoot, and regions of siliques and flowe…	protein_coding	TOUCH 3 (TCH3)	TOUCH 3 (TCH3);ARABIDOPSIS THALIANA CALMODULIN LIKE 4 (ATCAL4);CALMODULIN-LIKE 12 (CML12)
33
Locus Identifier	Gene Model Name	Gene Model Description	Gene Model Type	Primary Gene Symbol	All Gene Symbols
AT1G73630	AT1G73630.1	EF hand calcium-binding protein family;(source:Araport11)	protein_coding
AT2G43550	AT2G43550.1	Encodes a defensin-like (DEFL) family protein.	protein_coding
AT4G01020	AT4G01020.1	helicase domain-containing protein / IBR domain-containing protein / zinc finger protein-like protein;(source:Araport11)	protein_coding
AT2G44370	AT2G44370.1	Cysteine/Histidine-rich C1 domain family protein;(source:Araport11)	protein_coding
AT2G19460	AT2G19460.1	DUF3511 domain protein (DUF3511);(source:Araport11)	protein_coding
AT1G76970	AT1G76970.1	Target of Myb protein 1;(source:Araport11)	protein_coding
AT2G16900	AT2G16900.1	phospholipase-like protein (PEARLI 4) family protein;(source:Araport11)	protein_coding
AT5G18470	AT5G18470.1	Curculin-like (mannose-binding) lectin family protein;(source:Araport11)	protein_coding
AT5G23575	AT5G23575.1	Transmembrane CLPTM1 family protein;(source:Araport11)	protein_coding
AT5G57480	AT5G57480.1	P-loop containing nucleoside triphosphate hydrolases superfamily protein;(source:Araport11)	protein_coding
AT2G45300	AT2G45300.1	encodes 3-phosphoshikimate 1-carboxyvinyltransferase / 5-enolpyruvylshikimate-3-phosphate / EPSP synthase involved in chorismate biosynthesis The mRNA is cell-to-cell mobile.	protein_coding
AT4G20860	AT4G20860.1	involved in the generation of H2O2 from reduced compounds	protein_coding	(ATBBE22)	(ATBBE22);CELLODEXTRIN OXIDASE (CELLOX);BERBERINE BRIDGE ENZYME 22 (BBE22)
AT2G40140	AT2G40140.1	zinc finger (CCCH-type) family protein;(source:Araport11)	protein_coding	(CZF1)	(CZF1); (ZFAR1);TANDEM ZINC FINGER 10 (TZF10); (ATSZF2);(SALT-INDUCIBLE ZINC FINGER 2 (SZF2)
AT5G57220	AT5G57220.1	member of CYP81F, involved in glucosinolate metabolism. Mutants had impaired resistance to fungi. The mRNA is cell-to-cell mobile.	protein_coding	CYTOCHROME P450, FAMILY 81, SUBFAMILY F, POLYPEPTIDE 2 (CYP81F2)	CYTOCHROME P450, FAMILY 81, SUBFAMILY F, POLYPEPTIDE 2 (CYP81F2)
AT1G15520	AT1G15520.1	ABC transporter family involved in ABA transport and resistance to lead. Localizes to plasma membrane. Upregulated by lead. Expressed in leaves, flowers, stomata and roots.	protein_coding	ATP-BINDING CASSETTE G40 (ABCG40)	PLEIOTROPIC DRUG RESISTANCE 12 (PDR12);ARABIDOPSIS THALIANA ATP-BINDING CASSETTE G40 (ATABCG40);ATP-BINDING CASSETTE G40 (ABCG40);PLEIOTROPIC DRUG RESISTANCE 12 (ATPDR12)
AT3G07390	AT3G07390.1	isolated from differential screening of a cDNA library from auxin-treated root culture. sequence does not show homology to any known proteins and is predicted to be extracellular. The mRNA is cell-to-cell mobile.	protein_coding	AUXIN-INDUCED IN ROOT CULTURES 12 (AIR12)	AUXIN-INDUCED IN ROOT CULTURES 12 (AIR12)
AT4G21810	AT4G21810.1	DERLIN-2.1;(source:Araport11)	protein_coding	DERLIN-2.1 (DER2.1)	DERLIN-2.1 (DER2.1)
AT3G48090	AT3G48090.1	Component of R gene-mediated disease resistance in Arabidopsis thaliana with homology to eukaryotic lipases.	protein_coding	ENHANCED DISEASE SUSCEPTIBILITY 1 (EDS1)	(ATEDS1);ENHANCED DISEASE SUSCEPTIBILITY 1 (EDS1)
AT1G74710	AT1G74710.2	Encodes a protein with isochorismate synthase activity. Mutants fail to accumulate salicylic acid. Its function may be redundant with that of ICS2 (AT1G18870).	protein_coding	ENHANCED DISEASE SUSCEPTIBILITY TO ERYSIPHE ORONTII 16 (EDS16)	ENHANCED DISEASE SUSCEPTIBILITY TO ERYSIPHE ORONTII 16 (EDS16);SALICYLIC ACID INDUCTION DEFICIENT 2 (SID2);ISOCHORISMATE SYNTHASE 1 (ICS1)
AT4G08410	AT4G08410.1	Proline-rich extensin-like family protein;(source:Araport11)	protein_coding	EXTENSIN 8 (EXT8)	EXTENSIN 8 (EXT8)
AT5G25260	AT5G25260.1	Belongs to the group of plant flotillins, which are plasma membrane proteins. Flot2 complexes are found in microdomains and may be involved in plant-pathogen interactions, water transport and intracellular trafficking.	protein_coding	FLOTILIN2 (FLOT2)	FLOTILIN2 (FLOT2)
AT1G02920	AT1G02920.1	Encodes glutathione transferase belonging to the phi class of GSTs. Naming convention according to Wagner et al. (2002).	protein_coding	GLUTATHIONE S-TRANSFERASE 7 (GSTF7)	GLUTATHIONE S-TRANSFERASE 7 (GSTF7);GLUTATHIONE S-TRANSFERASE 11 (GST11); (ATGSTF7); (ATGSTF8);ARABIDOPSIS GLUTATHIONE S-TRANSFERASE 11 (ATGST11)
AT5G02780	AT5G02780.1	Encodes a member of the lambda family of glutathione transferases. It has thiol transferase activity and self S-glutathionylation activity in vitro.	protein_coding	GLUTATHIONE TRANSFERASE LAMBDA 1 (GSTL1)	GLUTATHIONE TRANSFERASE LAMBDA 1 (GSTL1)
AT2G29380	AT2G29380.1	highly ABA-induced PP2C protein 3;(source:Araport11)	protein_coding	HIGHLY ABA-INDUCED PP2C GENE 3 (HAI3)	HIGHLY ABA-INDUCED PP2C GENE 3 (HAI3)
AT5G58320	AT5G58320.2	Encodes a member of the NET superfamily of proteins that potentially couples different membranes to the actin cytoskeleton in plant cells. It colocalizes with filamentous actin and is localized to the tonoplast membrane. It is expressed in the epidermis of the root meristem and the early expansion zone.	protein_coding	NETWORKED 4A (NET4A)	NETWORKED 4A (NET4A)
AT4G24690	AT4G24690.1	Encodes NBR1, a selective autophagy substrate. The mRNA is cell-to-cell mobile.	protein_coding	NEXT TO BRCA1 GENE 1 (NBR1)	ARABIDOPSIS THALIANA NEXT TO BRCA1 GENE 1 (AtNBR1);NEXT TO BRCA1 GENE 1 (NBR1)
AT2G04450	AT2G04450.1	Encodes a protein with NADH pyrophosphatase activity. Although this protein was also shown to have ADP-ribose diphosphatase activity in vitro, mutant analyses suggest that NUDX6 is involved in NADH metabolism in vivo.	protein_coding	NUDIX HYDROLASE HOMOLOG 6 (NUDT6)	ARABIDOPSIS THALIANA NUCLEOSIDE DIPHOSPHATE LINKED TO SOME MOIETY X 6 (ATNUDX6);NUCLEOSIDE DIPHOSPHATES LINKED TO SOME MOIETY X 6 (NUDX6);NUDIX HYDROLASE HOMOLOG 6 (ATNUDT6);NUDIX HYDROLASE HOMOLOG 6 (NUDT6)
AT4G19840	AT4G19840.1	encodes a phloem lectin, similar to phloem lectin in cucumber and celery. Gene is expressed in the phloem, predominantly in the companion cells. The mRNA is cell-to-cell mobile.	protein_coding	PHLOEM PROTEIN 2-A1 (PP2-A1)	PHLOEM PROTEIN 2-A1 (ATPP2-A1);ARATHNICTABA 5 (AN5);PHLOEM PROTEIN 2-A1 (PP2-A1);PHLOEM PROTEIN 2-A1 (ATPP2A-1)
AT3G47820	AT3G47820.1	PLANT U-BOX 39;(source:Araport11)	protein_coding	PLANT U-BOX 39 (PUB39)	PLANT U-BOX 39 (PUB39)
AT2G02800	AT2G02800.1	Encodes protein kinase APK2b.	protein_coding	PROTEIN KINASE 2B (APK2B)	KINASE 2 (KIN2);PROTEIN KINASE 2B (APK2B);PBS1-LIKE 3 (PBL3)
AT1G09180	AT1G09180.1	A member of ARF-like GTPase family. A thaliana has 21 members, in two subfamilies, ARF and ARF-like (ARL) GTPases.	protein_coding	SECRETION-ASSOCIATED RAS SUPER FAMILY 1 (SARA1A)	SECRETION-ASSOCIATED RAS SUPER FAMILY 1 (ATSARA1A);SECRETION-ASSOCIATED RAS 1 (ATSAR1);SECRETION-ASSOCIATED RAS SUPER FAMILY 1 (SARA1A); (SAR1A)
AT3G52400	AT3G52400.1	syntaxin protein, involved in the negative regulation of defense pathways such as programmed cell death, salicylic acid signalling pathway, jasmonic acid signalling pathway	protein_coding	SYNTAXIN OF PLANTS 122 (SYP122)	(ATSYP122);SYNTAXIN OF PLANTS 122 (SYP122)
AT1G14360	AT1G14360.1	UDP-galactose transporter 3;(source:Araport11)	protein_coding	UDP-GALACTOSE TRANSPORTER 3 (UTR3)	UDP-GALACTOSE TRANSPORTER 3 (UTR3); (ATUTR3)
9
Locus Identifier	Gene Model Name	Gene Model Description	Gene Model Type	Primary Gene Symbol	All Gene Symbols
AT3G19390	AT3G19390.1	Granulin repeat cysteine protease family protein;(source:Araport11)	protein_coding
AT5G25940	AT5G25940.1	early nodulin-like protein;(source:Araport11)	protein_coding
AT2G44080	AT2G44080.1	Encodes ARL, a gene similar to ARGOS involved in cell expansion-dependent organ growth. Upregulated by brassinosteroid. Acts downstream of BRI1. The mRNA is cell-to-cell mobile.	protein_coding	ARGOS-LIKE (ARL)	ARGOS-LIKE (ARL)
AT5G13320	AT5G13320.1	Encodes an enzyme capable of conjugating amino acids to 4-substituted benzoates. 4-HBA (4-hydroxybenzoic acid) and pABA (4-aminobenzoate) may be targets of the enzyme in Arabidopsis, leading to the production of pABA-Glu, 4HBA-Glu, or other related compounds. This enzyme is involved in disease-resistance signaling. It is required for the accumulation of salicylic acid, activation of defense respo…	protein_coding	AVRPPHB SUSCEPTIBLE 3 (PBS3)	AVRPPHB SUSCEPTIBLE 3 (PBS3); (ATGH3.12);GRETCHEN HAGEN 3.12 (GH3.12);HOPW1-1-INTERACTING 3 (WIN3); (WIN3);GH3-LIKE DEFENSE GENE 1 (GDG1)
AT1G33960	AT1G33960.1	Identified as a gene that is induced by avirulence gene avrRpt2 and RPS2 after infection with Pseudomonas syringae pv maculicola strain ES4326 carrying avrRpt2	protein_coding	AVRRPT2-INDUCED GENE 1 (AIG1)	AVRRPT2-INDUCED GENE 1 (AIG1);IMMUNE ASSOCIATED NUCLEOTIDE BINDING 8 (IAN8)
AT5G13200	AT5G13200.1	Encodes a protein with unknown function that is involved in hormone mediated regulation of seed germination/dormancy.	protein_coding	GEM-RELATED 5 (GER5)	GEM-RELATED 5 (GER5)
AT3G05500	AT3G05500.1	Encodes a protein that associates with lipid droplet surfaces and shares sequence homology with family of small rubber particle proteins. The mRNA is cell-to-cell mobile.	protein_coding	LD-ASSOCIATED PROTEIN 3 (LDAP3)	SMALL RUBBER PARTICLE PROTEIN3 (SRP3);LD-ASSOCIATED PROTEIN 3 (LDAP3)
AT2G18660	AT2G18660.1	Encodes PNP-A (Plant Natriuretic Peptide A). PNPs are a class of systemically mobile molecules distantly related to expansins; their biological role has remained elusive. PNP-A contains a signal peptide domain and is secreted into the extracellular space. Co-expression analyses using microarray data suggest that PNP-A may function as a component of plant defence response and SAR in particular, an…	protein_coding	PLANT NATRIURETIC PEPTIDE A (PNP-A)	EXPANSIN-LIKE B3 PRECURSOR (EXLB3); (AtPNP-A);PLANT NATRIURETIC PEPTIDE A (PNP-A)
AT2G23810	AT2G23810.1	Member of TETRASPANIN family	protein_coding	TETRASPANIN8 (TET8)	TETRASPANIN8 (TET8)
89
Locus Identifier	Gene Model Name	Gene Model Description	Gene Model Type	Primary Gene Symbol	All Gene Symbols
AT4G24160	AT4G24160.1	Encodes a soluble lysophosphatidic acid acyltransferase with additional triacylglycerol lipase and phosphatidylcholine hydrolyzing enzymatic activities. Plays a pivotal role in maintaining the lipid homeostasis by regulating both phospholipid and neutral lipid levels.	protein_coding
AT1G72940	AT1G72940.1	Toll-Interleukin-Resistance (TIR) domain-containing protein;(source:Araport11)	protein_coding
AT3G11210	AT3G11210.1	SGNH hydrolase-type esterase superfamily protein;(source:Araport11)	protein_coding
AT4G28300	AT4G28300.1	Encodes a protein with 13.6% proline amino acids that is predicted to localize to the cell wall. The mRNA is cell-to-cell mobile.	protein_coding
AT2G05230	AT2G05230.1	DNAJ heat shock N-terminal domain-containing protein;(source:Araport11)	protein_coding
AT1G78200	AT1G78200.1	Protein phosphatase 2C family protein;(source:Araport11)	protein_coding
AT5G37070	AT5G37070.1	hypothetical protein (Protein of unknown function, DUF538);(source:Araport11)	protein_coding
AT1G03040	AT1G03040.1	basic helix-loop-helix (bHLH) DNA-binding superfamily protein;(source:Araport11)	protein_coding
AT1G12440	AT1G12440.1	A20/AN1-like zinc finger family protein;(source:Araport11)	protein_coding
AT5G58005	AT5G58005.1	Cytochrome c oxidase, subunit Vib family protein;(source:Araport11)	protein_coding
AT3G54680	AT3G54680.1	proteophosphoglycan-like protein;(source:Araport11)	protein_coding
AT1G26090	AT1G26090.1	P-loop containing nucleoside triphosphate hydrolases superfamily protein;(source:Araport11)	protein_coding
AT5G16010	AT5G16010.1	3-oxo-5-alpha-steroid 4-dehydrogenase family protein;(source:Araport11)	protein_coding
AT2G21640	AT2G21640.1	Encodes a protein of unknown function that is a marker for oxidative stress response.Expression in rosette leaves is activated by high concentration of boron.	protein_coding
AT1G55450	AT1G55450.2	S-adenosyl-L-methionine-dependent methyltransferases superfamily protein;(source:Araport11)	protein_coding
AT3G15770	AT3G15770.1	hypothetical protein;(source:Araport11)	protein_coding
AT2G46600	AT2G46600.1	Calcium-binding EF-hand family protein;(source:Araport11)	protein_coding
AT3G29240	AT3G29240.1	PPR containing protein (DUF179);(source:Araport11)	protein_coding
AT1G63290	AT1G63290.1	Aldolase-type TIM barrel family protein;(source:Araport11)	protein_coding
AT3G21770	AT3G21770.1	Peroxidase superfamily protein;(source:Araport11)	protein_coding
AT1G31940	AT1G31940.1	cystic fibrosis transmembrane conductance regulator;(source:Araport11)	protein_coding
AT1G54320	AT1G54320.1	LEM3 (ligand-effect modulator 3) family protein / CDC50 family protein;(source:Araport11)	protein_coding
AT1G23130	AT1G23130.1	Polyketide cyclase/dehydrase and lipid transport superfamily protein;(source:Araport11)	protein_coding
AT5G43450	AT5G43450.1	encodes a protein whose sequence is similar to ACC oxidase	protein_coding
AT4G38410	AT4G38410.1	Dehydrin family protein;(source:Araport11)	protein_coding
AT5G11970	AT5G11970.1	ABC family ABC transporter, putative (DUF3511);(source:Araport11)	protein_coding
AT1G80930	AT1G80930.1	MIF4G domain-containing protein / MA3 domain-containing protein;(source:Araport11)	protein_coding
AT5G15870	AT5G15870.1	glycosyl hydrolase family 81 protein;(source:Araport11)	protein_coding
AT5G54540	AT5G54540.1	Uncharacterized conserved protein (UCP012943);(source:Araport11)	protein_coding
AT5G46190	AT5G46190.1	RNA-binding KH domain-containing protein;(source:Araport11)	protein_coding
AT3G57785	AT3G57785.1	ESSS subunit of NADH:ubiquinone oxidoreductase (complex I) protein;(source:Araport11)	protein_coding
AT2G38330	AT2G38330.1	MATE efflux family protein;(source:Araport11)	protein_coding
AT5G15970	AT5G15970.1	Encodes a gene that can be induced by cold and abscisic acid and may be involved in cold acclimation and salt tolerance. The mRNA is cell-to-cell mobile.	protein_coding	(KIN2)	(KIN2); (AtCor6.6);COLD-RESPONSIVE 6.6 (COR6.6)
AT5G07900	AT5G07900.1	Mitochondrial transcription termination factor family protein;(source:Araport11)	protein_coding	(MTERF7)	(MTERF7)
AT1G76360	AT1G76360.1	Protein kinase superfamily protein;(source:Araport11)	protein_coding	(PBL31)	(PBL31)
AT5G11920	AT5G11920.1	Encodes a protein with fructan exohydrolase (FEH) activity acting on both inulin and levan-type fructans (1- and 6-FEH). The enzyme does not have invertase activity.	protein_coding	6-&1-FRUCTAN EXOHYDROLASE (cwINV6)	6-&1-FRUCTAN EXOHYDROLASE (AtcwINV6);6-&1-FRUCTAN EXOHYDROLASE (cwINV6)
AT2G31200	AT2G31200.1	Encodes actin depolymerizing factor 6 (ADF6). The mRNA is cell-to-cell mobile.	protein_coding	ACTIN DEPOLYMERIZING FACTOR 6 (ADF6)	ACTIN DEPOLYMERIZING FACTOR 6 (ADF6); (ATADF6)
AT2G19790	AT2G19790.1	Encodes a component of the AP4 complex and is involved in vacuolar sorting of storage proteins.	protein_coding	ADAPTOR PROTEIN COMPLEX 4S (AP4S)	ADAPTOR PROTEIN COMPLEX 4S (AP4S)
AT3G22370	AT3G22370.1	Encodes AOX1a, an isoform of alternative oxidase that is expressed in rosettes, flowers, and root. The alternative oxidase of plant mitochondria transfers electrons from the ubiquinone pool to oxygen without energy conservations. It is regulated through transcriptional control and by pyruvate. Plays a role in shoot acclimation to low temperature. Also is capable of ameliorating reactive oxygen sp…	protein_coding	ALTERNATIVE OXIDASE 1A (AOX1A)	ALTERNATIVE OXIDASE 1A (AOX1A);HYPER-SENSITIVITY-RELATED 3 (HSR3); (AtHSR3); (ATAOX1A)
AT5G61160	AT5G61160.1	anthocyanin 5-aromatic acyltransferase 1;(source:Araport11)	protein_coding	ANTHOCYANIN 5-AROMATIC ACYLTRANSFERASE 1 (AACT1)	P-COUMAROYL-COA:AGMATINE N4-P-COUMAROYL TRANSFERASE (ACT);ANTHOCYANIN 5-AROMATIC ACYLTRANSFERASE 1 (AACT1)
AT5G42050	AT5G42050.1	Stress responsive asparagine-rich protein. Binds to PevD (Verticillium dahliae ) fungal effector protein. NRP interacts with CRY2, leading to increased cytoplasmic accumulation of CRY2 in a blue light-independent manner (PMID:28633330).NRP also binds FyPP3 and recruits it to endosomes and thus targets it for degradation.	protein_coding	ASPARAGINE-RICH PROTEIN (NRP)	ASPARAGINE-RICH PROTEIN (NRP)
AT3G57130	AT3G57130.1	Encodes BOP1. Contains Pfam domain, PF00023: Ankyrin repeat and Pfam domain, PF00651: BTB/POZ domain. Lines carrying recessive mutations exhibit a number of visible defects, most pronounced being ectopic outgrowths of in leaf petioles of rosette leaves. Along with BOP2, BOP1 is required for nectary development and formation of normal abscission zones.Forms homodimers and heterodimers with BOP2. N…	protein_coding	BLADE ON PETIOLE 1 (BOP1)	BRZ-SENSITIVE-SHORT HYPOCOTYL1 (BSS1);BLADE ON PETIOLE 1 (BOP1)
AT2G41090	AT2G41090.1	Encodes a cytoplasmic, calcium binding calmodulin variant. CML10 interacts with phosphomannomutase (PMM)in vivo and increases its activity thereby affecting ascorbic acid biosynthesis. Its expression is induced by oxidative and other stress. The mRNA is cell-to-cell mobile.	protein_coding	CALMODULIN LIKE 10 (CML10)	CALMODULIN LIKE 10 (CML10)
AT3G07370	AT3G07370.1	Encodes AtCHIP, a new class of E3 ubiquitin ligases with three tetratricopeptide repeats and a U-box domain, structurally similar to the animal CHIP proteins. Plays an important role in plant cellular metabolism under temperature stress conditions. Functions as an E3 ubiquitin ligase of protein phosphatase 2A subunits and alters plant response to abscisic acid treatment. Belongs to one of the 36 …	protein_coding	CARBOXYL TERMINUS OF HSC70-INTERACTING PROTEIN (CHIP)	CARBOXYL TERMINUS OF HSC70-INTERACTING PROTEIN (CHIP);CARBOXYL TERMINUS OF HSC70-INTERACTING PROTEIN (ATCHIP)
AT1G30270	AT1G30270.1	Arabidopsis thaliana CBL-interacting protein kinase 23. CIPK23 serves as a positive regulator of the potassium transporter AKT1 by directly phosphorylating AKT1. CIPK23 is activated by the binding of two calcineurin B-like proteins, CBL1 and CBL9. The mRNA is cell-to-cell mobile.	protein_coding	CBL-INTERACTING PROTEIN KINASE 23 (CIPK23)	CBL-INTERACTING PROTEIN KINASE 23 (CIPK23);SNF1-RELATED PROTEIN KINASE 3.23 (SnRK3.23);SOS2-LIKE PROTEIN KINASE 17 (PKS17);LOW-K+-SENSITIVE 1 (LKS1); (ATCIPK23)
AT1G47960	AT1G47960.1	Plant cell wall (CWI) and vacuolar invertases (VI) play important roles in carbohydrate metabolism, stress responses and sugar signaling. This protein may inhibit their activity.	protein_coding	CELL WALL / VACUOLAR INHIBITOR OF FRUCTOSIDASE 1 (C/VIF1)	CELL WALL / VACUOLAR INHIBITOR OF FRUCTOSIDASE 1 (C/VIF1); (ATCIF1); (CIF1);CELL WALL / VACUOLAR INHIBITOR OF FRUCTOSIDASE 1 (ATC/VIF1)
AT4G17090	AT4G17090.1	Encodes a beta-amylase targeted to the chloroplast. Transgenic BMY8 RNAi lines fail to accumulate maltose during cold shock suggesting that maltose accumulation coincides with BMY8 expression. Apart from maltose, the sugar content of the RNAi lines were similar to wildtype (glucose and sucrose unaffected).BAM3 activity declines 2 and 4 days after start of cold stress despite an increase in transc…	protein_coding	CHLOROPLAST BETA-AMYLASE (CT-BMY)	CHLOROPLAST BETA-AMYLASE (CT-BMY); (ATBAM3);BETA-AMYLASE 8 (BMY8);BETA-AMYLASE 3 (BAM3)
AT2G42540	AT2G42540.2	A cold-regulated gene whose product is targeted to the chloroplast. Cor15am protects stromal proteins from aggregation under various stress conditions. Constitutive expression increases freezing tolerance in protoplasts in vitro and chloroplasts in vivo. NMR and x-ray diffraction studies suggest that COR15a alters the intrinsic curvature of the inner membrane of chloroplast envelope. Late Embryog…	protein_coding	COLD-REGULATED 15A (COR15A)	COLD-REGULATED 15A (COR15A); (ATCOR15A); (COR15)
AT3G49620	AT3G49620.1	encodes a protein similar to 2-oxoacid-dependent dioxygenase. Expression is induced after 24 hours of dark treatment, in senescing leaves and treatment with exogenous photosynthesis inhibitor. Induction of gene expression was suppressed in excised leaves supplied with sugar. The authors suggest that the gene's expression pattern is responding to the level of sugar in the cell.	protein_coding	DARK INDUCIBLE 11 (DIN11)	DARK INDUCIBLE 11 (DIN11)
AT1G48320	AT1G48320.1	Encodes one of the two functional DHNA-CoA (1,4-dihydroxy-2-naphthoyl-CoA) thioesterases found in Arabidopsis.	protein_coding	DHNA-COA THIOESTERASE 1 (DHNAT1)	DHNA-COA THIOESTERASE 1 (DHNAT1)
AT1G24340	AT1G24340.1	A locus involved in embryogenesis. Mutations in this locus result in embryo lethality. The mRNA is cell-to-cell mobile.	protein_coding	EMBRYO DEFECTIVE 2421 (emb2421)	EMBRYO DEFECTIVE 2421 (emb2421);EMBRYO DEFECTIVE 260 (EMB260)
AT5G44130	AT5G44130.1	Fasciclin-like arabinogalactan protein. Possibly involved in embryogenesis and seed development.	protein_coding	FASCICLIN-LIKE ARABINOGALACTAN PROTEIN 13 PRECURSOR (FLA13)	FASCICLIN-LIKE ARABINOGALACTAN PROTEIN 13 PRECURSOR (FLA13)
AT3G11700	AT3G11700.1	Fasciclin-like arabinogalactan protein. Possibly involved in embryogenesis and seed development.	protein_coding	FASCICLIN-LIKE ARABINOGALACTAN PROTEIN 18 PRECURSOR (FLA18)	FASCICLIN-LIKE ARABINOGALACTAN PROTEIN 18 PRECURSOR (FLA18)
AT2G04780	AT2G04780.1	fasciclin-like arabinogalactan-protein 7 (Fla7). Possibly involved in embryogenesis and seed development.	protein_coding	FASCICLIN-LIKE ARABINOOGALACTAN 7 (FLA7)	FASCICLIN-LIKE ARABINOOGALACTAN 7 (FLA7)
AT1G12200	AT1G12200.1	Putative flavin monooxygenase.	protein_coding	FLAVIN MONOOXYGENASE (FMO)	FLAVIN MONOOXYGENASE (FMO)
AT1G78340	AT1G78340.1	Encodes glutathione transferase belonging to the tau class of GSTs. Naming convention according to Wagner et al. (2002).	protein_coding	GLUTATHIONE S-TRANSFERASE TAU 22 (GSTU22)	GLUTATHIONE S-TRANSFERASE TAU 22 (GSTU22);GLUTATHIONE S-TRANSFERASE TAU 22 (ATGSTU22)
AT3G09270	AT3G09270.1	Encodes glutathione transferase belonging to the tau class of GSTs. Naming convention according to Wagner et al. (2002).	protein_coding	GLUTATHIONE S-TRANSFERASE TAU 8 (GSTU8)	GLUTATHIONE S-TRANSFERASE TAU 8 (GSTU8);GLUTATHIONE S-TRANSFERASE TAU 8 (ATGSTU8)
AT5G60620	AT5G60620.1	Glycerol-3-phosphate acyltransferase localized to the ER. Similar to mammalian cells involved in storage oil formation. ER-localized GPAT enzyme responsible for plant membrane lipid and oil biosynthesis.	protein_coding	GLYCEROL-3-PHOSPHATE ACYLTRANSFERASE 9 (GPAT9)	(ATGPAT9);GLYCEROL-3-PHOSPHATE ACYLTRANSFERASE 9 (GPAT9)
AT3G50480	AT3G50480.1	Homolog of RPW8	protein_coding	HOMOLOG OF RPW8 4 (HR4)	HOMOLOG OF RPW8 4 (HR4)
AT3G01290	AT3G01290.1	SPFH/Band 7/PHB domain-containing membrane-associated protein family;(source:Araport11)	protein_coding	HYPERSENSITIVE INDUCED REACTION 2 (HIR2)	(AtHIR2);HYPERSENSITIVE INDUCED REACTION 2 (HIR2)
AT5G01040	AT5G01040.1	putative laccase, knockout mutant showed early flowering	protein_coding	LACCASE 8 (LAC8)	LACCASE 8 (LAC8)
AT1G01470	AT1G01470.1	Encodes late-embryogenesis abundant protein whose mRNA levels are induced in response to wounding and light stress. Might be involved in protection against desiccation.	protein_coding	LATE EMBRYOGENESIS ABUNDANT 14 (LEA14)	LATE EMBRYOGENESIS ABUNDANT 14 (LEA14);ARABIDOPSIS THALIANA LATE EMBRYOGENESIS ABUNDANT 14 (ATLEA14); (LEA1);LIGHT STRESS-REGULATED 3 (LSR3)
AT3G06110	AT3G06110.2	Encodes a nuclear-localized MAP kinase phosphatase. Plants with reduced levels of MKP2 transcripts are hypersensitive to ozone and ozone-mediated activation of MPK3 and MPK6 is prolonged in these plants.	protein_coding	MAPK PHOSPHATASE 2 (MKP2)	DUAL-SPECIFICITY PROTEIN PHOSPHATASE 1B (DSPTP1B);MAPK PHOSPHATASE 2 (MKP2)
AT5G10300	AT5G10300.1	Encodes a protein with R-selective hydroxynitrile lyase activity. It has similarity to the SABP2 methyl salicylate esterase from tobacco. This protein does not act on methyl IAA, methyl JA, MeSA, MeGA4, or MEGA9 in vitro.	protein_coding	METHYL ESTERASE 5 (MES5)	ARABIDOPSIS THALIANA METHYL ESTERASE 5 (ATMES5); (AtHNL);HYDROXYNITRILE LYASE (HNL);METHYL ESTERASE 5 (MES5)
AT3G24500	AT3G24500.1	One of three genes in A. thaliana encoding multiprotein bridging factor 1, a highly conserved transcriptional coactivator. May serve as a bridging factor between a bZIP factor and TBP. Its expression is specifically elevated in response to pathogen infection, salinity, drought, heat, hydrogen peroxide, and application of abscisic acid or salicylic acid. Constitutive expression enhances the tolera…	protein_coding	MULTIPROTEIN BRIDGING FACTOR 1C (MBF1C)	(ATMBF1C);MULTIPROTEIN BRIDGING FACTOR 1C (MBF1C)
AT5G61390	AT5G61390.1	Polynucleotidyl transferase, ribonuclease H-like superfamily protein;(source:Araport11)	protein_coding	NAC45/86-DEPENDENT EXONUCLEASE-DOMAIN PROTEIN 2 (NEN2)	NAC45/86-DEPENDENT EXONUCLEASE-DOMAIN PROTEIN 2 (NEN2)
AT5G06320	AT5G06320.1	encodes a protein whose sequence is similar to tobacco hairpin-induced gene (HIN1) and Arabidopsis non-race specific disease resistance gene (NDR1). Expression of this gene is induced by cucumber mosaic virus, spermine and Pseudomonas syringae pv. tomato DC3000. The gene product is localized to the plasma membrane.	protein_coding	NDR1/HIN1-LIKE 3 (NHL3)	NDR1/HIN1-LIKE 3 (NHL3)
AT5G47070	AT5G47070.1	Encodes a member of the RLCK VII-4 subfamily of receptor-like cytoplasmic kinases that has been shown to phosphorylate MAPKKK5 Ser-599 and MEKK1 Ser-603, both players in PRR-mediated resistance to bacterial and fungal pathogens.	protein_coding	PBS1-LIKE 19 (PBL19)	PBS1-LIKE 19 (PBL19)
AT2G02230	AT2G02230.1	phloem protein 2-B1;(source:Araport11)	protein_coding	PHLOEM PROTEIN 2-B1 (PP2-B1)	PHLOEM PROTEIN 2-B1 (PP2-B1);PHLOEM PROTEIN 2-B1 (AtPP2-B1)
AT1G80110	AT1G80110.1	phloem protein 2-B11;(source:Araport11)	protein_coding	PHLOEM PROTEIN 2-B11 (PP2-B11)	PHLOEM PROTEIN 2-B11 (PP2-B11);PHLOEM PROTEIN 2-B11 (ATPP2-B11)
AT3G61470	AT3G61470.1	Encodes a component of the light harvesting antenna complex of photosystem I. The mRNA is cell-to-cell mobile.	protein_coding	PHOTOSYSTEM I LIGHT HARVESTING COMPLEX GENE 2 (LHCA2)	PHOTOSYSTEM I LIGHT HARVESTING COMPLEX GENE 2 (LHCA2)
AT3G52430	AT3G52430.1	Encodes a lipase-like gene that is important for salicylic acid signaling and function in resistance (R) gene-mediated and basal plant disease resistance. PAD4 can interact directly with EDS1, another disease resistance signaling protein. Expressed at elevated level in response to green peach aphid (GPA) feeding, and modulates the GPA feeding-induced leaf senescence through a mechanism that doesn…	protein_coding	PHYTOALEXIN DEFICIENT 4 (PAD4)	PHYTOALEXIN DEFICIENT 4 (PAD4);ARABIDOPSIS PHYTOALEXIN DEFICIENT 4 (ATPAD4)
AT3G62680	AT3G62680.1	Proline-rich protein The mRNA is cell-to-cell mobile.	protein_coding	PROLINE-RICH PROTEIN 3 (PRP3)	ARABIDOPSIS THALIANA PROLINE-RICH PROTEIN 3 (ATPRP3);PROLINE-RICH PROTEIN 3 (PRP3)
AT1G19770	AT1G19770.1	Member of a family of proteins related to PUP1, a purine transporter. May be involved in the transport of purine and purine derivatives such as cytokinins, across the plasma membrane. The mRNA is cell-to-cell mobile.	protein_coding	PURINE PERMEASE 14 (PUP14)	PURINE PERMEASE 14 (PUP14);PURINE PERMEASE 14 (ATPUP14)
AT4G17530	AT4G17530.1	AtRabD2c encodes a Rab GTPase, which plays important roles in pollen development, germination and tube elongation.	protein_coding	RAB GTPASE HOMOLOG 1C (RAB1C)	(RAB1C);RAB GTPASE HOMOLOG 1C (RAB1C); (ATRABD2C);RAB GTPASE HOMOLOG 1C (ATRAB1C)
AT5G47870	AT5G47870.1	cobalt ion-binding protein;(source:Araport11)	protein_coding	RADIATION SENSITIVE 52-2 (RAD52-2)	ORGANELLAR DNA-BINDING PROTEIN 2 (ODB2); (RAD52-2B);RADIATION SENSITIVE 52-2 (RAD52-2)
AT4G17230	AT4G17230.1	Encodes a scarecrow-like protein (SCL13). Member of GRAS gene family. Regulated by heat shock.	protein_coding	SCARECROW-LIKE 13 (SCL13)	SCARECROW-LIKE 13 (SCL13)
AT1G78290	AT1G78290.2	encodes a member of SNF1-related protein kinase (SnRK2) family whose activity is activated by ionic (salt) and non-ionic (mannitol) osmotic stress and dehydration.	protein_coding	SNF1-RELATED PROTEIN KINASE 2-8 (SNRK2-8)	SNF1-RELATED PROTEIN KINASE 2-8 (SNRK2-8);SNF1-RELATED PROTEIN KINASE 2C (SRK2C);SNF1-RELATED PROTEIN KINASE 2.8 (SNRK2.8)
AT1G72010	AT1G72010.1	Modulates GA-dependent stamen filament elongation by direct activation of SAUR63 subfamily genes through conserved target sites in their promoters.	protein_coding	TCP DOMAIN PROTEIN 22 (TCP22)	TCP DOMAIN PROTEIN 22 (TCP22); (ATTCP22)
AT5G58070	AT5G58070.1	Encodes a temperature-induced lipocalin TIL1. Involved in thermotolerance. Peripherally associated with plasma membrane.	protein_coding	TEMPERATURE-INDUCED LIPOCALIN (TIL)	TEMPERATURE-INDUCED LIPOCALIN (TIL);TEMPERATURE-INDUCED LIPOCALIN (ATTIL)
AT1G76760	AT1G76760.1	Encodes a y-type thioredoxin (Trx-y1) localized in chloroplast stroma.	protein_coding	THIOREDOXIN Y1 (TY1)	THIOREDOXIN Y1 (TRX-Y1);THIOREDOXIN Y1 (TY1);THIOREDOXIN Y1 (ATY1)
AT5G37770	AT5G37770.1	Encodes a protein with 40% similarity to calmodulin. Binds Ca(2+) and, as a consequence, undergoes conformational changes. CML24 expression occurs in all major organs, and transcript levels are increased from 2- to 15-fold in plants subjected to touch, darkness, heat, cold, hydrogen peroxide, abscisic acid (ABA), and indole-3-acetic acid. However, CML24 protein accumulation changes were not detec…	protein_coding	TOUCH 2 (TCH2)	CALMODULIN-LIKE 24 (CML24); (ATCML24);TOUCH 2 (TCH2)
AT5G57560	AT5G57560.1	Encodes a cell wall-modifying enzyme, rapidly upregulated in response to environmental stimuli.	protein_coding	TOUCH 4 (TCH4)	TOUCH 4 (TCH4); (ATXTH22);XYLOGLUCAN ENDOTRANSGLUCOSYLASE/HYDROLASE 22 (XTH22)
AT4G34131	AT4G34131.1	UDP-glucosyl transferase 73B3;(source:Araport11)	protein_coding	UDP-GLUCOSYL TRANSFERASE 73B3 (UGT73B3)	UDP-GLUCOSYL TRANSFERASE 73B3 (UGT73B3)
AT4G15780	AT4G15780.1	member of VAMP72 Gene Family	protein_coding	VESICLE-ASSOCIATED MEMBRANE PROTEIN 724 (VAMP724)	VESICLE-ASSOCIATED MEMBRANE PROTEIN 724 (VAMP724);VESICLE-ASSOCIATED MEMBRANE PROTEIN 724 (ATVAMP724)
AT1G65310	AT1G65310.1	Encodes a xyloglucan endotransglucosylase/hydrolase with only only the endotransglucosylase (XET; EC 2.4.1.207) activity towards xyloglucan and non-detectable endohydrolytic (XEH; EC 3.2.1.151) activity. Expressed in the mature or basal regions of both the main and lateral roots, but not in the tip of these roots where cell division occurs.	protein_coding	XYLOGLUCAN ENDOTRANSGLUCOSYLASE/HYDROLASE 17 (XTH17)	XYLOGLUCAN ENDOTRANSGLUCOSYLASE/HYDROLASE 17 (XTH17);XYLOGLUCAN ENDOTRANSGLUCOSYLASE/HYDROLASE 17 (ATXTH17)
AT4G30280	AT4G30280.1	Encodes a xyloglucan endotransglucosylase/hydrolase with only only the endotransglucosylase (XET; EC 2.4.1.207) activity towards xyloglucan and non-detectable endohydrolytic (XEH; EC 3.2.1.151) activity. Expressed in the mature or basal regions of both the main and lateral roots, but not in the tip of these roots where cell division occurs.	protein_coding	XYLOGLUCAN ENDOTRANSGLUCOSYLASE/HYDROLASE 18 (XTH18)	XYLOGLUCAN ENDOTRANSGLUCOSYLASE/HYDROLASE 18 (XTH18);XYLOGLUCAN ENDOTRANSGLUCOSYLASE/HYDROLASE 18 (ATXTH18)
AT4G30270	AT4G30270.1	encodes a protein similar to endo xyloglucan transferase in sequence. It is also very similar to BRU1 in soybean, which is involved in brassinosteroid response.	protein_coding	XYLOGLUCAN ENDOTRANSGLUCOSYLASE/HYDROLASE 24 (XTH24)	XYLOGLUCAN ENDOTRANSGLUCOSYLASE/HYDROLASE 24 (XTH24);SENESCENCE 4 (SEN4);MERISTEM-5 (MERI5B);MERISTEM 5 (MERI-5)
AT4G25810	AT4G25810.1	xyloglucan endotransglycosylase-related protein (XTR6)	protein_coding	XYLOGLUCAN ENDOTRANSGLYCOSYLASE 6 (XTR6)	XYLOGLUCAN ENDOTRANSGLUCOSYLASE/HYDROLASE 23 (XTH23);XYLOGLUCAN ENDOTRANSGLYCOSYLASE 6 (XTR6)

## Sheet: DOWN
Table S2. Gene descriptions for different clusters of differentially regulated proteins in Col, Ler and DM plants.
					19	2	23	3	46	5	3
					AT1G11130	AT3G04290	AT1G17620	AT4G25820	AT1G07720	AT1G66280	AT1G05240
					AT1G22200	AT4G12880	AT1G23090	AT5G04530	AT1G10680	AT2G31360	AT3G16370
					AT1G28600		AT1G29980	AT5G49720	AT1G12430	AT4G11650	AT4G28250
					AT1G66270		AT1G45130		AT1G16400	AT4G21960
					AT1G76540		AT1G75680		AT1G16410	AT5G64620
					AT2G04570		AT2G25560		AT1G28440
					AT2G15050		AT2G33790		AT1G54020
					AT2G17790		AT2G34070		AT1G57660
					AT2G19170		AT2G35260		AT1G62330
					AT3G17790		AT2G45970		AT1G68530
					AT3G20560		AT3G10720		AT1G70200
					AT3G61990		AT3G23190		AT1G72480
					AT4G23820		AT3G28830		AT1G73600
					AT4G24670		AT3G44990		AT1G74310
					AT5G11460		AT3G48340		AT2G31410
					AT5G13930		AT3G59400		AT2G36910
					AT5G14920		AT4G02270		AT2G38170
					AT5G24780		AT4G25870		AT3G02350
					AT5G25610		AT4G31290		AT3G03050
							AT5G01340		AT3G08550
							AT5G21100		AT3G09210
							AT5G60950		AT3G14240
							AT5G67400		AT3G18000
									AT3G22980
									AT3G25140
									AT3G28860
									AT3G52380
									AT3G54920
									AT3G58800
									AT3G62700
									AT4G18030
									AT4G24330
									AT4G30600
									AT4G32410
									AT4G38680
									AT4G39350
									AT5G03160
									AT5G05170
									AT5G14950
									AT5G23630
									AT5G40200
									AT5G45250
									AT5G45470
									AT5G51750
									AT5G58100
									AT5G65810

## Sheet: Gene Descriptions for down-reg
Table S2. Gene descriptions for different clusters of differentially regulated proteins in Col, Ler and DM plants.
19
Locus Identifier	Gene Model Name	Gene Model Description	Gene Model Type	Primary Gene Symbol	All Gene Symbols
AT1G28600	AT1G28600.1	GDSL-motif esterase/acyltransferase/lipase. Enzyme group with broad substrate specificity that may catalyze acyltransfer or hydrolase reactions with lipid and non-lipid substrates.	protein_coding
AT1G22200	AT1G22200.1	Endoplasmic reticulum vesicle transporter protein;(source:Araport11)	protein_coding
AT4G23820	AT4G23820.1	Pectin lyase-like superfamily protein;(source:Araport11)	protein_coding
AT1G66270	AT1G66270.1	BGLU21 encodes a beta-glucosidase that has a high level of activity against the naturally occuring secondary metabolite scopolin. Recombinant BGLU21 produced in insect cells shows lower levels of activity using the structurally similar substrates esculin (33%) and 4-MU-glucoside (9%). BGLU21 is glycosylated in planta and has a C-terminal ER retention signal. Transcript analysis as well as protein…	protein_coding	(BGLU21)	(BGLU21)
AT5G14920	AT5G14920.1	Encodes a GASA domain containing protein that regulates increases in plant growth through GA-induced and DELLA-dependent signal transduction and that can increase abiotic stress resistance by reducing ROS accumulation.	protein_coding	A-STIMULATED IN ARABIDOPSIS 14 (GASA14)	A-STIMULATED IN ARABIDOPSIS 14 (GASA14)
AT1G76540	AT1G76540.1	Encodes a cyclin-dependent protein kinase involved in regulation of the G2/M transition of the mitotic cell cycle. Specifically binds to the cyclin CYCD4;1, expressed in shoot meristem, young leaves and vascular tissue during the G2/M phase. Required for proper organization of the shoot apical meristem and for hormone signaling.	protein_coding	CYCLIN-DEPENDENT KINASE B2;1 (CDKB2;1)	CYCLIN-DEPENDENT KINASE B2;1 (CDKB2;1)
AT5G11460	AT5G11460.1	FCS like zinc finger 10 is induced during energy starvation through SnRK1 signaling. Mutants accumulate more SnRK1alpha1 which results in the inhibition of seedling growth under favorable growth conditions. Increased SnRK1 activity in the mutant also results in the downregulation of TOR signaling (DOI:10.1111/tpj.13854).	protein_coding	FCS LIKE ZINC FINGER 10 (FLZ10)	FCS LIKE ZINC FINGER 10 (FLZ10)
AT2G15050	AT2G15050.1	Predicted to encode a PR (pathogenesis-related) protein. Belongs to the lipid transfer protein (PR-14) family with the following members: At2g38540/LTP1, At2g38530/LTP2, At5g59320/LTP3, At5g59310/LTP4, At3g51600/LTP5, At3g08770/LTP6, At2g15050/LTP7, At2g18370/LTP8, At2g15325/LTP9, At5g01870/LTP10, At4g33355/LTP11, At3g51590/LTP12, At5g44265/LTP13, At5g62065/LTP14, At4g08530/LTP15.	protein_coding	LIPID TRANSFER PROTEIN (LTP)	LIPID TRANSFER PROTEIN 7 (LTP7);LIPID TRANSFER PROTEIN (LTP)
AT3G61990	AT3G61990.1	Encodes a protein methyltransferase. Involved in the methylation of plant transmembrane proteins.	protein_coding	O-MTASE FAMILY 3 PROTEIN (OMTF3)	O-MTASE FAMILY 3 PROTEIN (OMTF3)
AT2G04570	AT2G04570.1	GDSL-motif esterase/acyltransferase/lipase. Enzyme group with broad substrate specificity that may catalyze acyltransfer or hydrolase reactions with lipid and non-lipid substrates. The mRNA is cell-to-cell mobile.	protein_coding	OCCLUDED STOMATAL PORES 1 (OSP1)	OCCLUDED STOMATAL PORES 1 (OSP1)
AT3G20560	AT3G20560.1	Encodes a protein disulfide isomerase-like (PDIL) protein, a member of a multigene family within the thioredoxin (TRX) superfamily. Unlike several other PDI family members, transcript levels for this gene are not up-regulated in response to three different chemical inducers of ER stress (dithiothreitol, beta-mercaptoethanol, and tunicamycin).	protein_coding	PDI-LIKE 5-3 (PDIL5-3)	PDI-LIKE 5-3 (PDIL5-3);ARABIDOPSIS THALIANA PROTEIN DISULFIDE ISOMERASE 12 (ATPDI12);PROTEIN DISULFIDE ISOMERASE 12 (PDI12);PDI-LIKE 5-3 (ATPDIL5-3)
AT3G17790	AT3G17790.1	Expression is upregulated in the shoot of cax1/cax3 mutant and is responsive to phosphate (Pi) and not phosphite (Phi) in roots and shoots.	protein_coding	PURPLE ACID PHOSPHATASE 17 (PAP17)	(ATACP5);PURPLE ACID PHOSPHATASE 17 (PAP17); (ATPAP17)
AT5G25610	AT5G25610.1	responsive to dehydration 22 (RD22) mediated by ABA	protein_coding	RESPONSIVE TO DESICCATION 22 (RD22)	(ATRD22);RESPONSIVE TO DESICCATION 22 (RD22)
AT1G11130	AT1G11130.1	Encodes an atypical receptor-like kinase protein with a predicted extracellular domain of six leucine-rich repeats and an intracellular serine-threonine kinase domain expressed throughout the developing root but whose kinase activity is not essential for its function in vivo. Regulates expression of GLABRA2, CAPRICE, WEREWOLF, and ENHANCER OF GLABRA3. Required for floral organ shape, the developm…	protein_coding	STRUBBELIG (SUB)	STRUBBELIG (SUB);STRUBBELIG-RECEPTOR FAMILY 9 (SRF9);SCRAMBLED (SCM)
AT2G19170	AT2G19170.1	Encodes a novel subtilisin-like serine protease.	protein_coding	SUBTILISIN-LIKE SERINE PROTEASE 3 (SLP3)	SUBTILISIN-LIKE SERINE PROTEASE 3 (SLP3)
AT5G13930	AT5G13930.1	Encodes chalcone synthase (CHS), a key enzyme involved in the biosynthesis of flavonoids. Required for the accumulation of purple anthocyanins in leaves and stems. Also involved in the regulation of auxin transport and the modulation of root gravitropism. The mRNA is cell-to-cell mobile.	protein_coding	TRANSPARENT TESTA 4 (TT4)	CHALCONE SYNTHASE (CHS); (ATCHS);TRANSPARENT TESTA 4 (TT4)
AT4G24670	AT4G24670.1	Encodes a protein with similarity to the TAA1 trytophan aminotransferase involved in IAA biosynthesis. Double mutant analyses suggest that this protein is involved in regulating many aspects of plant growth and development from embryogenesis to flower formation and plays a role in ethylene-mediated signaling.TAR2 is required for reprogramming root architecture in response to low nitrogen conditio…	protein_coding	TRYPTOPHAN AMINOTRANSFERASE RELATED 2 (TAR2)	TRYPTOPHAN AMINOTRANSFERASE RELATED 2 (TAR2); (ATTAR2)
AT5G24780	AT5G24780.1	encodes an acid phosphatase similar to soybean vegetative storage proteins. Gene expression is induced by wounding and jasmonic acid.	protein_coding	VEGETATIVE STORAGE PROTEIN 1 (VSP1)	(ATVSP1);VEGETATIVE STORAGE PROTEIN 1 (VSP1)
AT2G17790	AT2G17790.1	Encodes a protein with similarity to yeast VPS35 which encodes a component of the retromer involved in retrograde endosomal transport. Mutants partially suppress the loss of VTI11 function in Arabidopsis and restores gravitropism in the double mutant. The mRNA is cell-to-cell mobile.	protein_coding	VPS35 HOMOLOG A (VPS35A)	ZIG SUPPRESSOR 3 (ZIP3);VPS35 HOMOLOG A (VPS35A)
5
Locus Identifier	Gene Model Name	Gene Model Description	Gene Model Type	Primary Gene Symbol	All Gene Symbols
AT1G66280	AT1G66280.1	Glycosyl hydrolase superfamily protein;(source:Araport11)	protein_coding	(BGLU22)	(BGLU22)
AT4G21960	AT4G21960.1	Encodes AT4g21960 (AT4g21960/T8O5_170). The mRNA is cell-to-cell mobile.	protein_coding	(PRXR1)	(PRXR1)
AT2G31360	AT2G31360.1	Encodes a protein homologous to delta 9 acyl-lipid desaturases of cyanobacteria and acyl-CoA desaturases of yeast and mammals. expression up-regulated by cold temperature. It is involved in the synthesis of the 24:1n-9 and 26:1n-9 components of seed lipids, sphingolipids and the membrane phospholipids phosphatidylserine (PS), and phosphatidylethanolamine (PE).	protein_coding	16:0DELTA9 DESATURASE 2 (ADS2)	16:0DELTA9 DESATURASE 2 (DS2); (ATADS2);16:0DELTA9 DESATURASE 2 (ADS2)
AT5G64620	AT5G64620.1	Plant cell wall (CWI) and vacuolar invertases (VI) play important roles in carbohydrate metabolism, stress responses and sugar signaling.	protein_coding	CELL WALL / VACUOLAR INHIBITOR OF FRUCTOSIDASE 2 (C/VIF2)	CELL WALL / VACUOLAR INHIBITOR OF FRUCTOSIDASE 2 (ATC/VIF2);CELL WALL / VACUOLAR INHIBITOR OF FRUCTOSIDASE 2 (C/VIF2)
AT4G11650	AT4G11650.1	osmotin-like protein	protein_coding	OSMOTIN 34 (OSM34)	OSMOTIN 34 (OSM34);OSMOTIN 34 (ATOSM34)
2
Locus Identifier	Gene Model Name	Gene Model Description	Gene Model Type	Primary Gene Symbol	All Gene Symbols
AT4G12880	AT4G12880.1	early nodulin-like protein 19;(source:Araport11)	protein_coding	EARLY NODULIN-LIKE PROTEIN 19 (ENODL19)	(AtENODL19);EARLY NODULIN-LIKE PROTEIN 19 (ENODL19)
AT3G04290	AT3G04290.1	Li-tolerant lipase 1;(source:Araport11)	protein_coding	LI-TOLERANT LIPASE 1 (LTL1)	LI-TOLERANT LIPASE 1 (LTL1); (ATLTL1)
3
Locus Identifier	Gene Model Name	Gene Model Description	Gene Model Type	Primary Gene Symbol	All Gene Symbols
AT3G16370	AT3G16370.1	GDSL-motif esterase/acyltransferase/lipase. Enzyme group with broad substrate specificity that may catalyze acyltransfer or hydrolase reactions with lipid and non-lipid substrates. The mRNA is cell-to-cell mobile.	protein_coding
AT4G28250	AT4G28250.1	putative beta-expansin/allergen protein. Naming convention from the Expansin Working Group (Kende et al, 2004. Plant Mol Bio). Involved in the formation of nematode-induced syncytia in roots of Arabidopsis thaliana.	protein_coding	EXPANSIN B3 (EXPB3)	EXPANSIN B3 (ATEXPB3); (ATHEXP BETA 1.6);EXPANSIN B3 (EXPB3)
AT1G05240	AT1G05240.1	Peroxidase superfamily protein;(source:Araport11)	protein_coding	PATHOGENESIS RELATED 9 (PR9)	PATHOGENESIS RELATED 9 (PR9)
23
Locus Identifier	Gene Model Name	Gene Model Description	Gene Model Type	Primary Gene Symbol	All Gene Symbols
AT3G10720	AT3G10720.2	Plant invertase/pectin methylesterase inhibitor superfamily;(source:Araport11)	protein_coding
AT3G23190	AT3G23190.1	HR-like lesion-inducing protein-like protein;(source:Araport11)	protein_coding
AT2G25560	AT2G25560.1	DNAJ heat shock N-terminal domain-containing protein;(source:Araport11)	protein_coding
AT3G28830	AT3G28830.1	mucin-like protein, putative (DUF1216);(source:Araport11)	protein_coding
AT4G25870	AT4G25870.1	Core-2/I-branching beta-1,6-N-acetylglucosaminyltransferase family protein;(source:Araport11)	protein_coding
AT1G29980	AT1G29980.1	choice-of-anchor C domain protein, putative (Protein of unknown function, DUF642);(source:Araport11)	protein_coding
AT1G17620	AT1G17620.1	Late embryogenesis abundant (LEA) hydroxyproline-rich glycoprotein family;(source:Araport11)	protein_coding
AT5G21100	AT5G21100.1	Plant L-ascorbate oxidase;(source:Araport11)	protein_coding
AT1G23090	AT1G23090.1	Encodes AST91 mRNA for sulfate transporter.	protein_coding	(SULTR3;3)	(SULTR3;3);SULFATE TRANSPORTER 91 (AST91)
AT2G45970	AT2G45970.1	Encodes a member of the CYP86A subfamily of cytochrome p450 genes. Expressed at moderate levels in flowers, leaves, roots and stems.Mutant seeds have reduced seed longevity, higher tetrazolium salt uptake and reduction, and reduced lipid polyester barriers (PMID:32519347).	protein_coding	CYTOCHROME P450, FAMILY 86, SUBFAMILY A, POLYPEPTIDE 8 (CYP86A8)	CYTOCHROME P450, FAMILY 86, SUBFAMILY A, POLYPEPTIDE 8 (CYP86A8);LACERATA (LCR)
AT2G33790	AT2G33790.1	pollen Ole e 1 allergen protein containing 14.6% proline residues, similar to arabinogalactan protein (Daucus carota) GI:11322245, SP:Q03211 Pistil-specific extensin-like protein precursor (PELP) {Nicotiana tabacum}; contains Pfam profile PF01190: Pollen proteins Ole e I family	protein_coding	ARABINOGALACTAN PROTEIN 30 (AGP30)	(ATAGP30);ARABINOGALACTAN PROTEIN 30 (AGP30)
AT2G35260	AT2G35260.1	CAAX protease self-immunity protein;(source:Araport11)	protein_coding	BALANCE OF CHLOROPHYLL METABOLISM 1 (BCM1)	BALANCE OF CHLOROPHYLL METABOLISM 1 (BCM1)
AT1G45130	AT1G45130.1	beta-galactosidase 5;(source:Araport11)	protein_coding	BETA-GALACTOSIDASE 5 (BGAL5)	(ATBGAL5);BETA-GALACTOSIDASE 5 (BGAL5)
AT5G60950	AT5G60950.1	COBRA-like protein 5 precursor;(source:Araport11)	protein_coding	COBRA-LIKE PROTEIN 5 PRECURSOR (COBL5)	COBRA-LIKE PROTEIN 5 PRECURSOR (COBL5)
AT3G48340	AT3G48340.1	KDEL-tailed cysteine endopeptidase. Mutants generated via RNAi show decreased lateral root growth.	protein_coding	CYSTEINE ENDOPEPTIDASE 2 (CEP2)	CYSTEINE ENDOPEPTIDASE 2 (CEP2)
AT4G31290	AT4G31290.1	ChaC-like family protein;(source:Araport11)	protein_coding	GAMMA-GLUTAMYL CYCLOTRANSFERASE 2;2 (GGCT2;2)	(ATGGCT2;2);GAMMA-GLUTAMYL CYCLOTRANSFERASE 2;2 (GGCT2;2)
AT3G59400	AT3G59400.1	GUN, genomes uncoupled, is necessary for coupling the expression of some nuclear genes to the functional state of the chloroplast. Binds to the magnesium chelatase complex and promotes formation of the substrate,a tetrapyrrole signaling molecule. Porphyrin-binding protein that enhances the activity of Mg-chelatase. Although required for chlorophyll accumulation under normal growth conditions, GUN…	protein_coding	GENOMES UNCOUPLED 4 (GUN4)	GENOMES UNCOUPLED 4 (GUN4)
AT1G75680	AT1G75680.1	glycosyl hydrolase 9B7;(source:Araport11)	protein_coding	GLYCOSYL HYDROLASE 9B7 (GH9B7)	GLYCOSYL HYDROLASE 9B7 (GH9B7);GLYCOSYL HYDROLASE 9B7 (AtGH9B7)
AT5G01340	AT5G01340.1	Transports citrate, isocitrate and aconitate, succinate and fumarate. Catalyzes a fast counter-exchange transport as well as a low uniport of substrates, exhibits a higher transport affinity for tricarboxylates than dicarboxylates. Might be involved in storage oil mobilization 78 at early stages of seedling growth and in nitrogen assimilation in root tissue by 79 catalyzing citrate/isocitrate or …	protein_coding	MITOCHONDRIAL SUCCINATE-FUMARATE CARRIER 1 (mSFC1)	MITOCHONDRIAL SUCCINATE-FUMARATE CARRIER 1 (mSFC1); (AtmSFC1);SUCCINATE/FUMARATE CARRIER 1 (SFC1)
AT4G02270	AT4G02270.1	root hair specific 13;(source:Araport11)	protein_coding	ROOT HAIR SPECIFIC 13 (RHS13)	SEED AND ROOT HAIR PROTECTIVE PROTEIN (SRPP);ROOT HAIR SPECIFIC 13 (RHS13)
AT5G67400	AT5G67400.1	root hair specific 19;(source:Araport11)	protein_coding	ROOT HAIR SPECIFIC 19 (RHS19)	ROOT HAIR SPECIFIC 19 (RHS19)
AT2G34070	AT2G34070.1	Encodes a member of the TBL (TRICHOME BIREFRINGENCE-LIKE) gene family containing a plant-specific DUF231 (domain of unknown function) domain. TBL gene family has 46 members, two of which (TBR/AT5G06700 and TBL3/AT5G01360) have been shown to be involved in the synthesis and deposition of secondary wall cellulose, presumably by influencing the esterification state of pectic polymers. A nomenclature…	protein_coding	TRICHOME BIREFRINGENCE-LIKE 37 (TBL37)	TRICHOME BIREFRINGENCE-LIKE 37 (TBL37)
AT3G44990	AT3G44990.1	Encodes a xyloglucan endotransglycosylase/hydrolase. Protein sequence and phylogenetic analysis indicates that this enzyme resides in Group III-A of the XTH family, with high similarity to Tropaeolum majus (nasturtium) xyloglucanase 1 (TmNXG1).Enzyme kinetic analysis indicates predominant xyloglucan endo-hydrolase activity (EC 3.2.1.151) with only limited potential to act as a xyloglucan endo-tra…	protein_coding	XYLOGLUCAN ENDOTRANSGLUCOSYLASE/HYDROLASE 31 (XTH31)	XYLOGLUCAN ENDO-TRANSGLYCOSYLASE-RELATED 8 (XTR8); (ATXTH31);XYLOGLUCAN ENDOTRANSGLUCOSYLASE/HYDROLASE 31 (XTH31); (ATXTR8)
3
Locus Identifier	Gene Model Name	Gene Model Description	Gene Model Type	Primary Gene Symbol	All Gene Symbols
AT3G16370	AT3G16370.1	GDSL-motif esterase/acyltransferase/lipase. Enzyme group with broad substrate specificity that may catalyze acyltransfer or hydrolase reactions with lipid and non-lipid substrates. The mRNA is cell-to-cell mobile.	protein_coding
AT4G28250	AT4G28250.1	putative beta-expansin/allergen protein. Naming convention from the Expansin Working Group (Kende et al, 2004. Plant Mol Bio). Involved in the formation of nematode-induced syncytia in roots of Arabidopsis thaliana.	protein_coding	EXPANSIN B3 (EXPB3)	EXPANSIN B3 (ATEXPB3); (ATHEXP BETA 1.6);EXPANSIN B3 (EXPB3)
AT1G05240	AT1G05240.1	Peroxidase superfamily protein;(source:Araport11)	protein_coding	PATHOGENESIS RELATED 9 (PR9)	PATHOGENESIS RELATED 9 (PR9)
Locus Identifier	Gene Model Name	Gene Model Description	Gene Model Type	Primary Gene Symbol	All Gene Symbols
AT1G62330	AT1G62330.1	O-fucosyltransferase family protein;(source:Araport11)	protein_coding
AT3G14240	AT3G14240.1	Subtilase family protein;(source:Araport11)	protein_coding
AT1G54020	AT1G54020.2	GDSL-motif esterase/acyltransferase/lipase. Enzyme group with broad substrate specificity that may catalyze acyltransfer or hydrolase reactions with lipid and non-lipid substrates.	protein_coding
AT4G30600	AT4G30600.1	signal recognition particle receptor alpha subunit family protein;(source:Araport11)	protein_coding
AT3G58800	AT3G58800.1	secretion-regulating guanine nucleotide exchange factor;(source:Araport11)	protein_coding
AT3G22980	AT3G22980.1	Ribosomal protein S5/Elongation factor G/III/V family protein;(source:Araport11)	protein_coding
AT1G72480	AT1G72480.1	Lung seven transmembrane receptor family protein;(source:Araport11)	protein_coding
AT4G18030	AT4G18030.1	S-adenosyl-L-methionine-dependent methyltransferases superfamily protein;(source:Araport11)	protein_coding
AT5G45470	AT5G45470.1	transmembrane protein, putative (DUF594);(source:Araport11)	protein_coding
AT4G24330	AT4G24330.1	hypothetical protein (DUF1682);(source:Araport11)	protein_coding
AT2G31410	AT2G31410.1	coiled-coil protein;(source:Araport11)	protein_coding
AT1G57660	AT1G57660.1	Translation protein SH3-like family protein;(source:Araport11)	protein_coding
AT5G58100	AT5G58100.1	transmembrane protein;(source:Araport11)	protein_coding
AT1G73600	AT1G73600.2	Encodes a S-adenosyl-L-methionine-dependent phosphoethanolamine N-methyltransferase whose expression is responsive to both phosphate (Pi) and phosphite (Phi) in roots. It catalyzes the three sequential P-base methylation of phosphoethanolamine to phosphocholine. Homologous biochemical function to NMT1 (At3g18000). Double mutants of NMT1 and NMT3 are defective in leaf, root, flower, seed, and poll…	protein_coding	(NMT3)	(NMT); (DEG26);PHOSPHOETHANOLAMINE METHYLTRANSFERASE3 (ATPMT3); (NMT3)
AT1G70200	AT1G70200.1	Encodes a RNA-Binding Protein RBD1. Promotes chilling tolerance through 23S rRNA processing.	protein_coding	(RBD1)	HIGH PHOTOSYNTHETIC EFFICIENCY 1 (HPE1); (RBD1)
AT1G16400	AT1G16400.1	Encodes cytochrome P450 CYP79F2.	protein_coding	CYTOCHROME P450, FAMILY 79, SUBFAMILY F, POLYPEPTIDE 2 (CYP79F2)	CYTOCHROME P450, FAMILY 79, SUBFAMILY F, POLYPEPTIDE 2 (CYP79F2)
AT1G07720	AT1G07720.1	Encodes KCS3, a member of the 3-ketoacyl-CoA synthase family involved in the biosynthesis of VLCFA (very long chain fatty acids).	protein_coding	3-KETOACYL-COA SYNTHASE 3 (KCS3)	3-KETOACYL-COA SYNTHASE 3 (KCS3)
AT1G68530	AT1G68530.1	Encodes KCS6, a member of the 3-ketoacyl-CoA synthase family involved in the biosynthesis of VLCFA (very long chain fatty acids).	protein_coding	3-KETOACYL-COA SYNTHASE 6 (KCS6)	CUTICULAR 1 (CUT1);POLLEN-PISTIL INCOMPATIBILITY 1 (POP1);ECERIFERUM 6 (CER6); (ATCER6);3-KETOACYL-COA SYNTHASE 6 (KCS6); (ATCUT1); (G2)
AT1G12430	AT1G12430.2	Encodes the kinesin-like protein PAK has an Armadillo motif tail and is involved in guard cell development in Arabidopsis (from Genbank record AF159052).However, no defect in stomatal complexes has been observed in loss of function mutations. It accumulates at the preprophase band (PPB) in a cell-cycle and microtubule-dependent manner and is most highly expressed in cells where the placement of t…	protein_coding	ARMADILLO REPEAT KINESIN 3 (ARK3)	ARMADILLO REPEAT KINESIN 3 (ARK3);ARABIDOPSIS THALIANA KINESIN UNGROUPED CLADE, GENE A (AtKINUa)
AT2G36910	AT2G36910.1	Belongs to the family of ATP-binding cassette (ABC) transporters. Also known as AtMDR1.Possibly regulates auxin-dependent responses by influencing basipetal auxin transport in the root. Exerts nonredundant, partially overlapping functions with the ABC transporter encoded by AT3G28860. PGP1 mediates cellular efflux of IAA and interacts with PIN genes that may confer an accelerated vectoral compone…	protein_coding	ATP-BINDING CASSETTE B1 (ABCB1)	ARABIDOPSIS THALIANA P GLYCOPROTEIN1 (ATPGP1);ATP-BINDING CASSETTE B1 (ABCB1);P-GLYCOPROTEIN 1 (PGP1)
AT3G28860	AT3G28860.1	Encodes a member of the ATP-binding cassette (ABC) transporter family that is involved in auxin transport and is involved in postembryonic organ separation. Also known as AtMDR11 and PGP19. Possibly regulates auxin-dependent responses by influencing basipetal auxin transport in the root. Acts upstream of phyA in regulating hypocotyl elongation and gravitropic response. Exerts nonredundant, partia…	protein_coding	ATP-BINDING CASSETTE B19 (ABCB19)	(ATMDR1);MULTIDRUG RESISTANCE PROTEIN 11 (ATMDR11);P-GLYCOPROTEIN 19 (PGP19);ARABIDOPSIS THALIANA ATP-BINDING CASSETTE B19 (ATABCB19); (MDR1); (ATPGP19);ATP-BINDING CASSETTE B19 (ABCB19); (MDR11)
AT3G62700	AT3G62700.1	member of MRP subfamily	protein_coding	ATP-BINDING CASSETTE C14 (ABCC14)	MULTIDRUG RESISTANCE-ASSOCIATED PROTEIN 10 (ATMRP10);ATP-BINDING CASSETTE C14 (ABCC14);MULTIDRUG RESISTANCE-ASSOCIATED PROTEIN 10 (MRP10)
AT2G38170	AT2G38170.3	Encodes a high affinity vacuolar calcium antiporter. The residue His 338 is critical to Ca2+ transport activity. Disruption of CAX1 reduces manganese and zinc of shoot tissue and results in a decrease in the activity of vacuolar V-type proton ATPase.	protein_coding	CATION EXCHANGER 1 (CAX1)	CATION EXCHANGER 1 (CAX1);RARE COLD INDUCIBLE 4 (RCI4); (ATCAX1)
AT4G32410	AT4G32410.1	Encodes a cellulose synthase isomer. CESA1 mutants have cellulose defect in the primary cell wall. Multiple lines of evidence suggest that CESA1, along with CESA3 and CESA6 are present in the same plasma membrane complex for cellulose biosynthesis. lasma membrane complex for cellulose biosynthesis. As inferred from the null role of secondary wall-type CesAs, included in a set of five primary wall…	protein_coding	CELLULOSE SYNTHASE 1 (CESA1)	ANISOTROPY1 (ANY1);CELLULOSE SYNTHASE 1 (AtCESA1);RADIALLY SWOLLEN 1 (RSW1);CELLULOSE SYNTHASE 1 (CESA1)
AT4G39350	AT4G39350.1	Encodes a cellulose synthase isomer, related to CESA6. As inferred from the null role of secondary wall-type CesAs, included in a set of five primary wall-type CesAs that may support trichome cell wall thickening. The mRNA is cell-to-cell mobile.	protein_coding	CELLULOSE SYNTHASE A2 (CESA2)	CELLULOSE SYNTHASE A2 (CESA2); (ATCESA2); (ATH-A)
AT3G03050	AT3G03050.1	encodes a cellulose synthase like protein. mutations initiate root hairs that rupture at their tip soon after initiation. is required for the synthesis of a noncellulosic wall polysaccharide.	protein_coding	CELLULOSE SYNTHASE-LIKE D3 (CSLD3)	CELLULOSE SYNTHASE LIKE D3 (ATCSLD3);ROOT HAIR DEFECTIVE 7 (RHD7);CELLULOSE SYNTHASE-LIKE D3 (CSLD3);KOJAK (KJK)
AT3G52380	AT3G52380.1	Encodes a chloroplast RNA-binding protein that stabilizes chloroplast RNAs as evidenced by analyses of transcript accumulation in null mutants. Essential for seedling development (albino, strongly retarded growth even on sucrose-containing medium).	protein_coding	CHLOROPLAST RNA-BINDING PROTEIN 33 (CP33)	PIGMENT DEFECTIVE 322 (PDE322);CHLOROPLAST RNA-BINDING PROTEIN 33 (CP33)
AT5G05170	AT5G05170.1	Encodes a cellulose synthase isomer. CESA3 mutants have cellulose defect in the primary cell wall. Multiple lines of evidence suggest that CESA3, along with CESA1 and CESA6 are present in the same plasma membrane complex for cellulose biosynthesis. As inferred from the null role of secondary wall-type CesAs, included in a set of five primary wall-type CesAs that may support trichome cell wall thi…	protein_coding	CONSTITUTIVE EXPRESSION OF VSP 1 (CEV1)	CONSTITUTIVE EXPRESSION OF VSP 1 (CEV1); (ATH-B); (ATCESA3);ISOXABEN RESISTANT 1 (IXR1);MULTIPLE RESPONSE EXPANSION 1 (MRE1);CELLULOSE SYNTHASE 3 (CESA3);ECTOPIC LIGNIFICATION 1 (ELI1)
AT5G65810	AT5G65810.1	Encodes CGR3 (cotton Golgi-related 3). CGR3 and a close homologue CGR2 have overlapping roles in pectin methylesterification and plant growth.	protein_coding	COTTON GOLGI-RELATED 3 (CGR3)	COTTON GOLGI-RELATED 3 (CGR3)
AT1G16410	AT1G16410.1	member of CYP79F The mRNA is cell-to-cell mobile.	protein_coding	CYTOCHROME P450 79F1 (CYP79F1)	CYTOCHROME P450 79F1 (CYP79F1);SUPERSHOOT 1 (SPS1);BUSHY 1 (BUS1)
AT5G40200	AT5G40200.1	Encodes a putative DegP protease. The mRNA is cell-to-cell mobile.	protein_coding	DEGRADATION OF PERIPLASMIC PROTEINS 9 (DEG9)	DEGRADATION OF PERIPLASMIC PROTEINS 9 (DEG9);DEGP PROTEASE 9 (DegP9)
AT3G02350	AT3G02350.1	Encodes a protein with putative galacturonosyltransferase activity. The mRNA is cell-to-cell mobile.	protein_coding	GALACTURONOSYLTRANSFERASE 9 (GAUT9)	GALACTURONOSYLTRANSFERASE 9 (GAUT9)
AT4G38680	AT4G38680.1	Encodes a glycine-rich protein that binds nucleic acids and promotes DNA melting. Its transcript and protein levels are up-regulated in response to cold treatment with protein levels peaking earlier in shoots (~10-14 days) than in roots (~21 days). It is normally expressed in meristematic regions and developing tissues where cell division occurs. RNAi and antisense lines with lower levels of CSP2…	protein_coding	GLYCINE RICH PROTEIN 2 (GRP2)	GLYCINE RICH PROTEIN 2 (GRP2);COLD SHOCK DOMAIN PROTEIN 2 (CSDP2);COLD SHOCK PROTEIN 2 (CSP2);ARABIDOPSIS THALIANA COLD SHOCK PROTEIN 2 (ATCSP2)
AT5G14950	AT5G14950.1	Encodes a golgi alpha-mannosidase, an enzyme responsible for the formation of major complex-type N-glycans.	protein_coding	GOLGI ALPHA-MANNOSIDASE II (GMII)	(ATGMII);GOLGI ALPHA-MANNOSIDASE II (GMII)
AT1G28440	AT1G28440.1	HAESA-like 1;(source:Araport11)	protein_coding	HAESA-LIKE 1 (HSL1)	HAESA-LIKE 1 (HSL1)
AT1G74310	AT1G74310.1	Encodes ClpB1, which belongs to the Casein lytic proteinase/heat shock protein 100 (Clp/Hsp100) family. Involved in refolding of proteins which form aggregates under heat stress. Also known as AtHsp101. AtHsp101 is a cytosolic heat shock protein required for acclimation to high temperature.	protein_coding	HEAT SHOCK PROTEIN 101 (HSP101)	HEAT SHOCK PROTEIN 101 (ATHSP101); (HOT1);HEAT SHOCK PROTEIN 101 (HSP101)
AT5G03160	AT5G03160.1	J domain protein localized in ER lumen. Can partially compensate for the growth defect in jem1 scj1 mutant yeast.	protein_coding	HOMOLOG OF MAMALLIAN P58IPK (P58IPK)	HOMOLOG OF MAMALLIAN P58IPK (P58IPK);HOMOLOG OF MAMALLIAN P58IPK (ATP58IPK)
AT3G08550	AT3G08550.1	mutant is Dwarfed and shows defects in cell elongation; Cellulose deficient; Plasma Membrane Protein	protein_coding	KOBITO (KOB1)	ELONGATION DEFECTIVE 1 (ELD1);KOBITO (KOB1);ABA INSENSITIVE 8 (ABI8)
AT1G10680	AT1G10680.1	P-glycoprotein 10;(source:Araport11)	protein_coding	P-GLYCOPROTEIN 10 (PGP10)	ATP-BINDING CASSETTE B10 (ABCB10);P-GLYCOPROTEIN 10 (PGP10)
AT5G23630	AT5G23630.1	A member of the eukaryotic type V subfamily (P5) of P-type ATPase cation pumps; MIA is most similar to the human P5 ATPase ATY2(44% identity) and to Spf1p from S. cerevisiae (41% identity). Highly abundant in the endoplasmic reticulum and small vesicles of developing pollen grains and tapetum cells. T-DNA insertional mutants of MIA suffer from imbalances in cation homeostasis and exhibit a severe…	protein_coding	PHOSPHATE DEFICIENCY RESPONSE 2 (PDR2)	PHOSPHATE DEFICIENCY RESPONSE 2 (PDR2); (PDR2);MALE GAMETOGENESIS IMPAIRED ANTHERS (MIA)
AT3G09210	AT3G09210.1	plastid transcriptionally active 13;(source:Araport11)	protein_coding	PLASTID TRANSCRIPTIONALLY ACTIVE 13 (PTAC13)	PLASTID TRANSCRIPTIONALLY ACTIVE 13 (PTAC13)
AT3G54920	AT3G54920.1	Powdery mildew resistant mutant encodes a pectate lyase-like protein The mRNA is cell-to-cell mobile.	protein_coding	POWDERY MILDEW RESISTANT 6 (PMR6)	POWDERY MILDEW RESISTANT 6 (PMR6)
AT3G25140	AT3G25140.1	Quasimodo1, encodes a glycosyltransferase, involved in homogalacturonan biosynthesis; mutant shows cell adhesion defect and lower wall uronic acid content. The mRNA is cell-to-cell mobile.	protein_coding	QUASIMODO 1 (QUA1)	QUASIMODO 1 (QUA1);GALACTURONOSYLTRANSFERASE 8 (GAUT8)
AT5G45250	AT5G45250.1	RPS4 belongs to the Toll/interleukin-1 receptor (TIR)-nucleotide binding site (NBS)-Leu-rich repeat (LRR) class of disease resistance (R ) genes. Confers specific resistance to Pseudomonas syringae pv. tomato carrying the avirulence gene AvrRPS4. Produces alternative transcripts with truncated open reading frames.	protein_coding	RESISTANT TO P. SYRINGAE 4 (RPS4)	RESISTANT TO P. SYRINGAE 4 (RPS4)
AT5G51750	AT5G51750.1	subtilase 1.3;(source:Araport11)	protein_coding	SUBTILASE 1.3 (SBT1.3)	SUBTILASE 1.3 (SBT1.3);SUBTILASE 1.3 (ATSBT1.3)
AT3G18000	AT3G18000.1	Encodes a N-methyltransferase-like protein. Double mutants of NMT1 and NMT3 are defective in leaf, root, flower, seed, and pollen development.	protein_coding	XIPOTL 1 (XPL1)	N-METHYLTRANSFERASE 1 (NMT1);XIPOTL 1 (XPL1); (PEAMT); (DPR2); (PEAMT1);PHOSPHOETHANOLAMINE METHYLTRANSFERASE1 (ATPMT1)
