# Supplementary material for: Quantitative Proteomic Analysis of ER Stress Response Reveals both Common and Specific Features in Two Contrasting Ecotypes of Arabidopsis thaliana
Source: Int J Mol Sci. 2020 Dec 21;21(24):9741. doi: 10.3390/ijms21249741 (PMC7766468; doi:10.3390/ijms21249741)
Supplement: Supplementary file 1 [file ijms-21-09741-s001.zip › Table S3.xlsx]

## Sheet: Sheet1
Table S3. Primers used in this study.
Locus	Name	Purpose	Primer sequences(5'-3')
AT1G27330	qRAMP4F	qRT-PCR	AGACCACCACCAAGAAGGGTAAG
AT1G27330	qRAMP4R	qRT-PCR	TCCACTAGTTGCGGTCCTGATG
AT1G56340	qCRT1F	qRT-PCR	AGACCTTAGTCTTCCAATTCTC
AT1G56340	qCRT1R	qRT-PCR	CCATTGTAAGTAAGGATAGCATG
AT1G65720	qAt1g65720F	qRT-PCR	TCCGTCGTCTAAATCCTCACCAC
AT1G65720	qAt1g65720R	qRT-PCR	TTGGATCTGTGGCTTCTCGTGAC
AT1G72280	qERO1F	qRT-PCR	CAACAGCATACTTGGAGCA
AT1G72280	qERO1R	qRT-PCR	CTTCATCAAACGGAACAGGACA
AT2G02810	qUTr1F	qRT-PCR	TGGTCCGCCTACATCTACCAAG
AT2G02810	qUTr1R	qRT-PCR	TGGACCAAATCTCTTCGTGGACAG
AT2G24980	qEXT6F	qRT-PCR	CTCCCAGCTATGAACACAAAGGC
AT2G24980	qEXT6F	qRT-PCR	TAGTTTACCTTTGGCGATGGAGTG
AT2G29740	qUGT71C2F	qRT-PCR	TGTGCCGAGGAGGAAACTGAAG
AT2G29740	qUGT71C2R	qRT-PCR	ACGAAGATCCACCGTCCATCAC
AT3G12250	qTGA6F	qRT-PCR	CGCTCATCCGAACTTCTCAAGC
AT3G12250	qTGA6R	qRT-PCR	GTCTGCTGCAAGCTATTGATGCC
AT3G16990	qTenA2F	qRT-PCR	ACATTGCCGAACGTTGTCTGGAG
AT3G16990	qTenA2R	qRT-PCR	ACATCTTCAGCTTCACCGAGCAC
AT3G18780	qACTINF	qRT-PCR	GGTAACATTGTGCTCAGTGGTGG
AT3G18780	qACTINR	qRT-PCR	AACGACCTTAATCTTCATGCTGC
AT3G20920	qSEC62F	qRT-PCR	GCCGAGAAGAAGAGGGTTAAACG
AT3G20920	qSEC62R	qRT-PCR	TCCTTCTTCACAGCTTGCTTCC
AT3G51000	qAt3g51000F	qRT-PCR	TCTACCGAGCCACGAGTCTTACAC
AT3G51000	qAt3g51000R	qRT-PCR	AAAGCCTGAGTAGTGCCGTAGTG
AT4G29960	qEBS7F	qRT-PCR	CTCAGGATCCAGCGTCTTCTTCTG
AT4G29960	qEBS7R	qRT-PCR	CAAATGAACCGTGGAGCTGGGA
AT5G19250	qAt5g19250F	qRT-PCR	TCTCCAAGCTCCATCTACTCTTCC
AT5G19250	qAt5g19250R	qRT-PCR	CATCTTCTTCATCGGCGGTGTC
AT5G24590	qANAC091F	qRT-PCR	CCAGCGAATGTCGTAGTGGATAC
AT5G24590	qANAC091R	qRT-PCR	AGCCAATCGATATCGTCAAGCC
AT5G25250	qFLOT1F	qRT-PCR	TGCGATGGCGGTTAGAGACTTG
AT5G25250	qFLOT1R	qRT-PCR	ATTCCCACTACCACCACCCTGTTC
AT5G35080	qOS9F	qRT-PCR	AAGCGACGAGTGGATGGACTTC
AT5G35080	qOS9R	qRT-PCR	TAAGACCACCAACCCTCTTGCC
AT5G44120	qCRA1F	qRT-PCR	GTGTCATTAGGCCGCCTTTG
AT5G44120	qCRA1R	qRT-PCR	GTCAGCACGAGACGGGTCAT
AT5G55730	qFLA1F	qRT-PCR	AGATGATGCTGGTGCGGTTAGG
AT5G55730	qFLA1R	qRT-PCR	ACAAGCAGAGCAAGCTCACCAC
AT5G61790	qCNX1F	qRT-PCR	ATGAGACAACGGCAACTATTTTCC
AT5G61790	qCNX1R	qRT-PCR	CCATAATCCTCATGTCCTTCACT
AT5G64400	q12CYS-1F	qRT-PCR	GTTCAACCATTGCTCAGGGTATGG
AT5G64400	q12CYS-1R	qRT-PCR	AGCCTCATGCTGAATGGTTCGTG
AT1G21750	qPDI5F	qRT-PCR	CTCGTGAAGCTGAGGGTATTG
AT1G21750	qPDI5R	qRT-PCR	TGTGCGAAATCTAACTCAGAG
